# Supplementary material
Source: PubMed Central journal article supplement (PMC6304055)
Supplement: rspb20182181supp4.pdf [file rspb20182181supp4.pdf]

Gamma estimated from Jønsson et al. (2016)

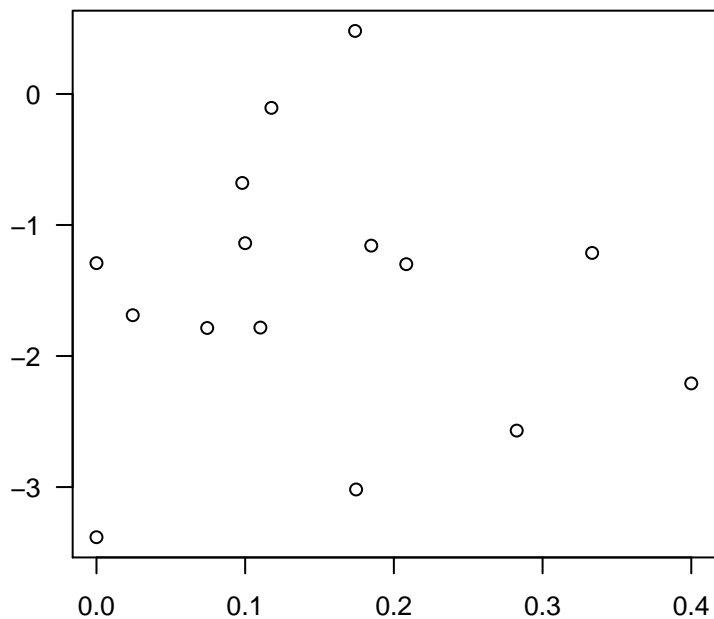

Proportion of missing species per family in Jønsson et al. (2016)

Gamma estimated from Kennedy et al. (2017)

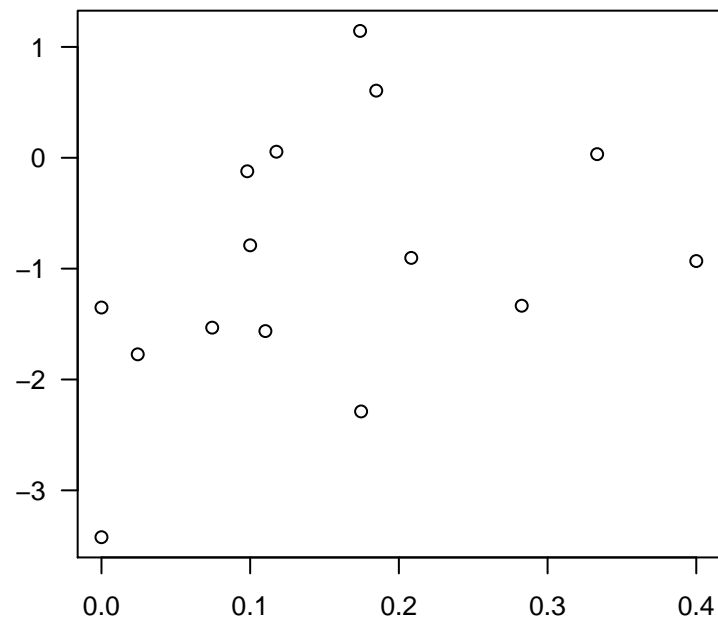

Proportion of missing species per family in Jønsson et al. (2016)

Gamma estimated from Jønsson et al. (2016)

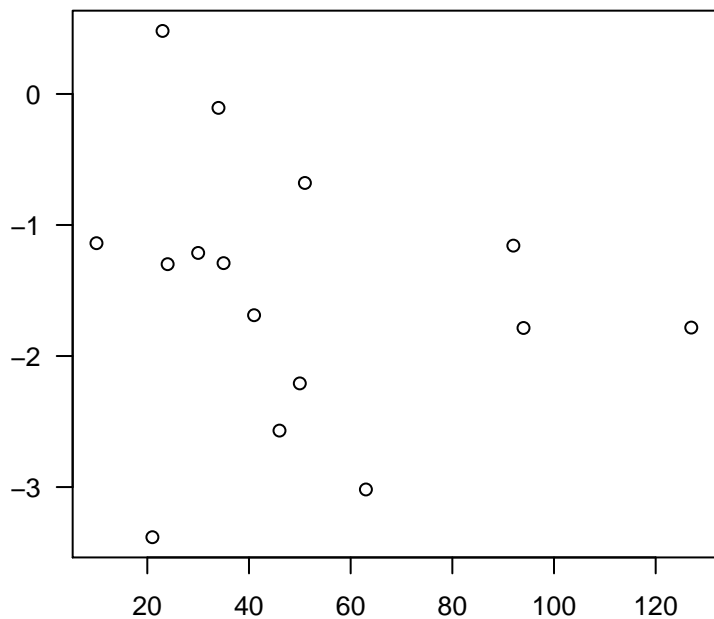

Family species richness

Gamma estimated from Kennedy et al. (2017)

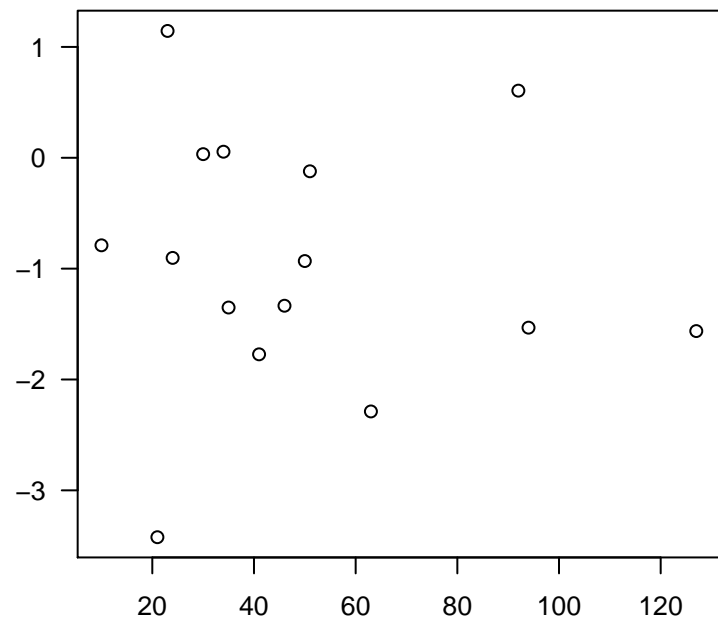

Family species richness
