# Supplementary material
Source: PubMed Central journal article supplement (PMC6304055)

### c) Cinclosomatidae - 10 species

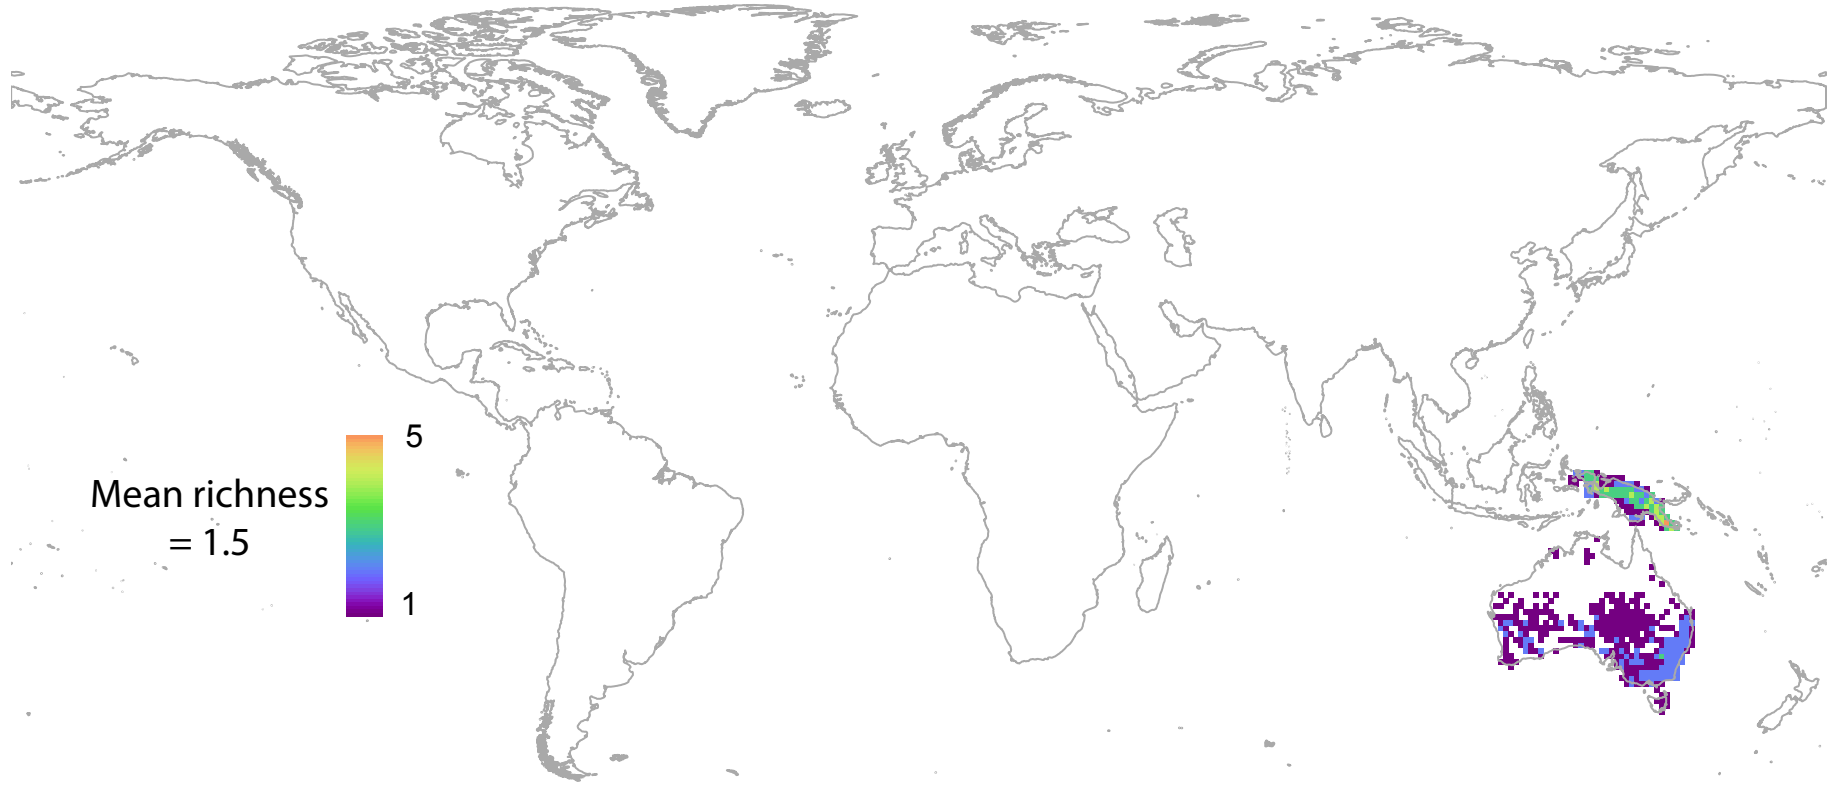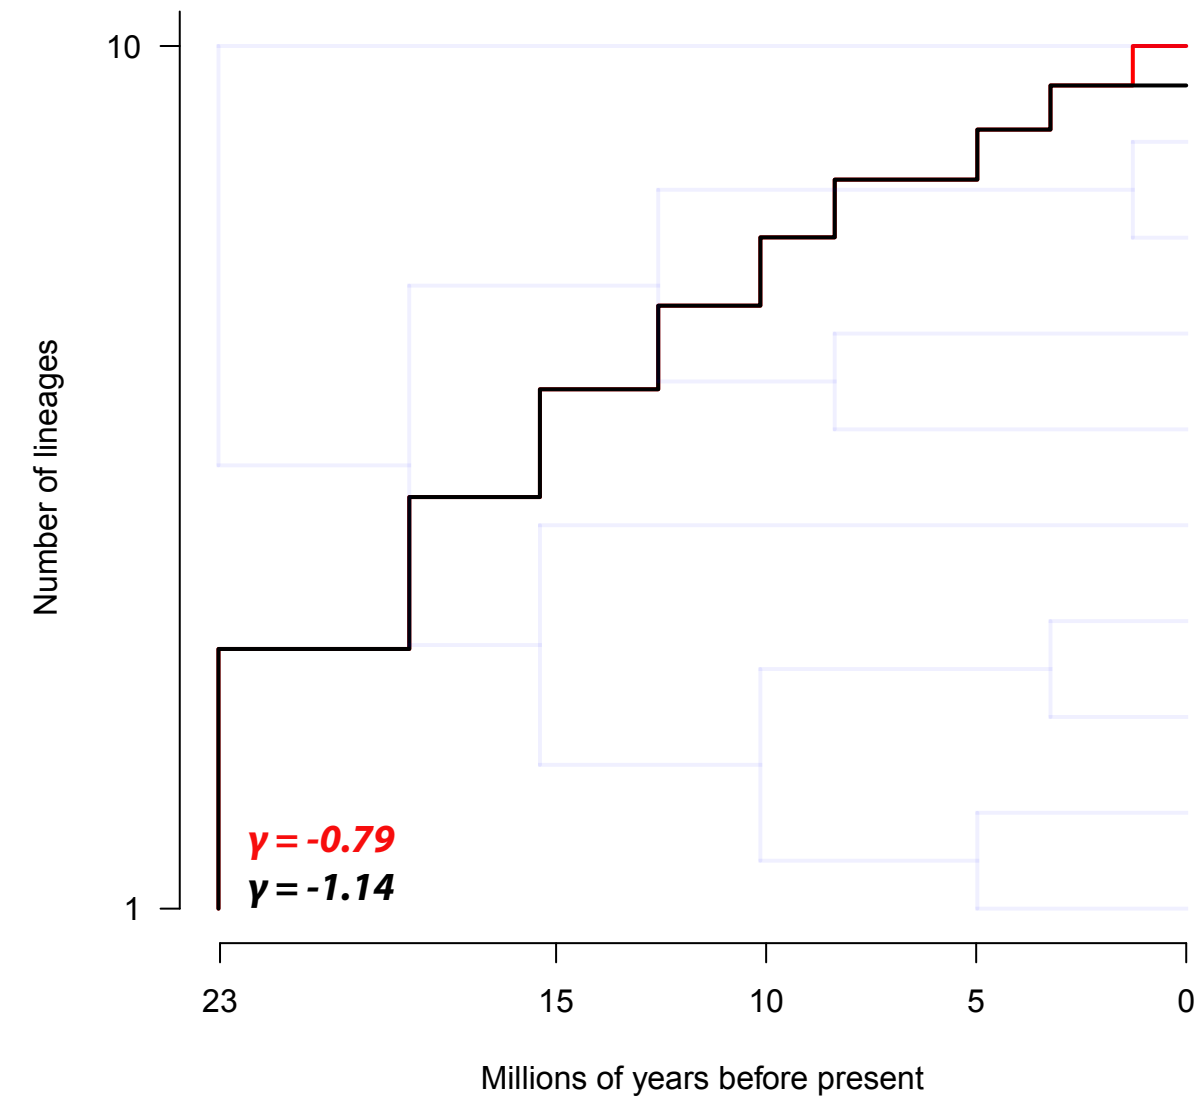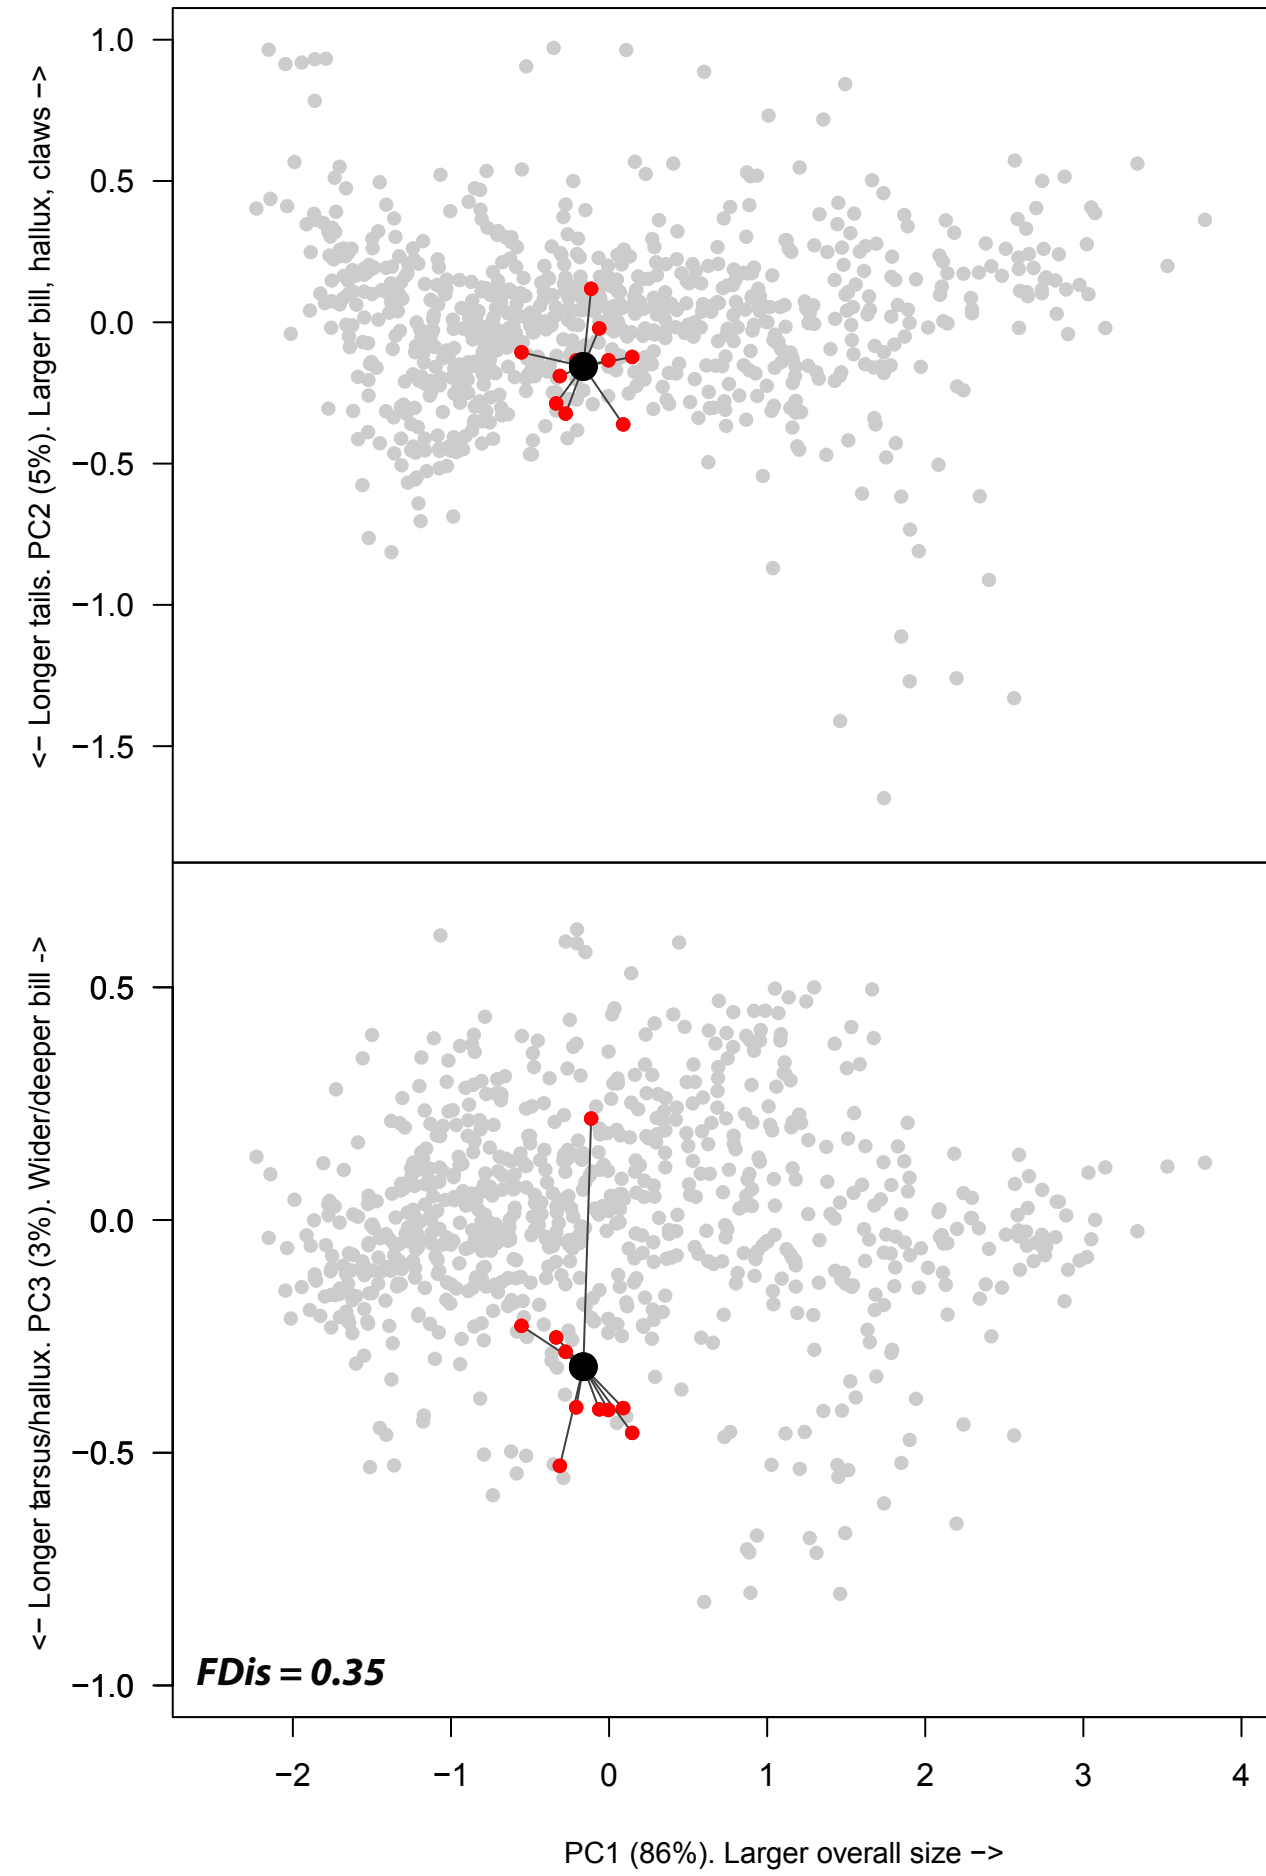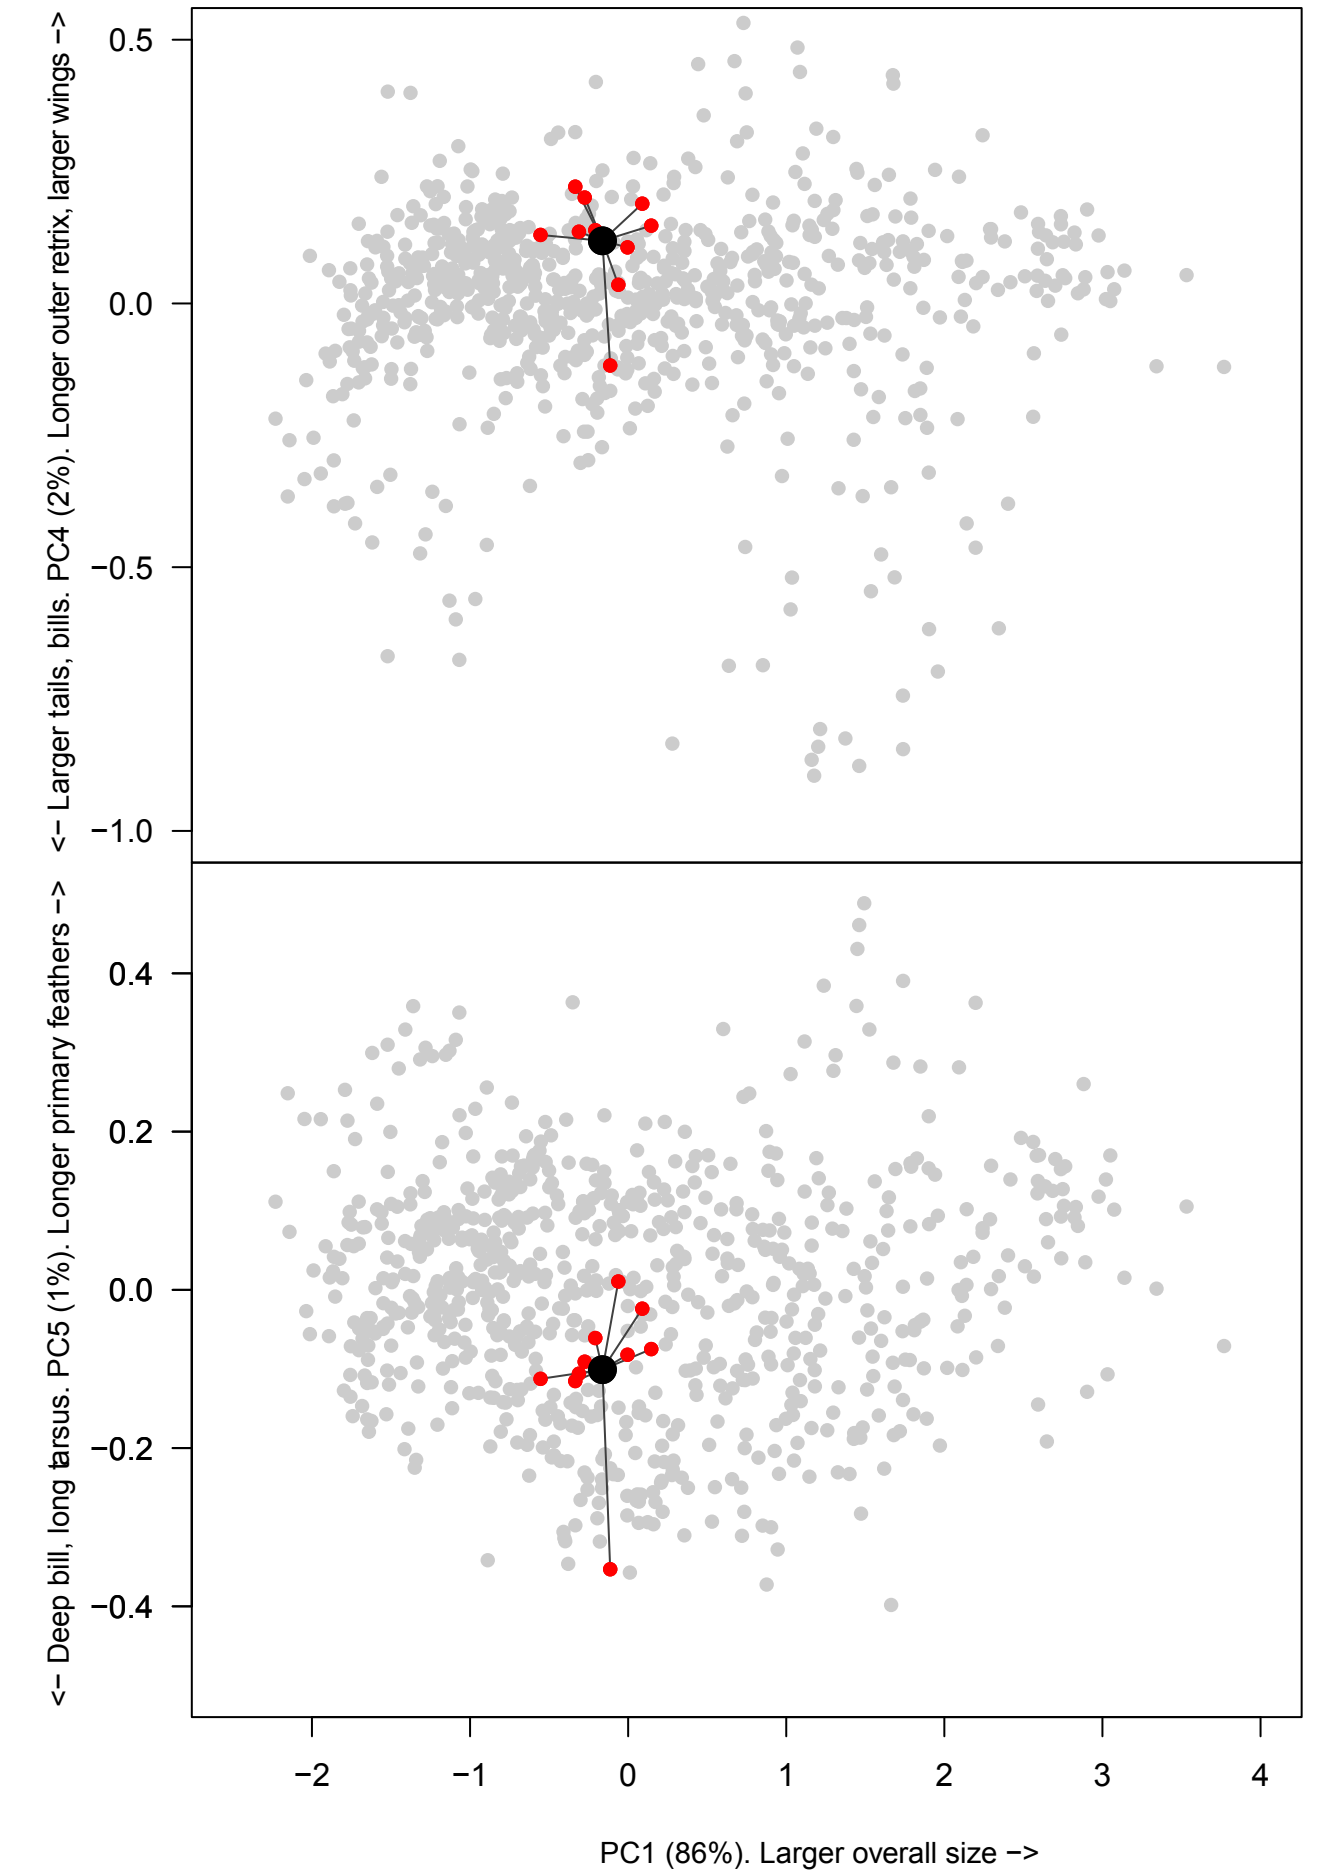

Supplement: rspb20182181supp10.pdf [file rspb20182181supp10.pdf]

# d) Corvidae - 127 species

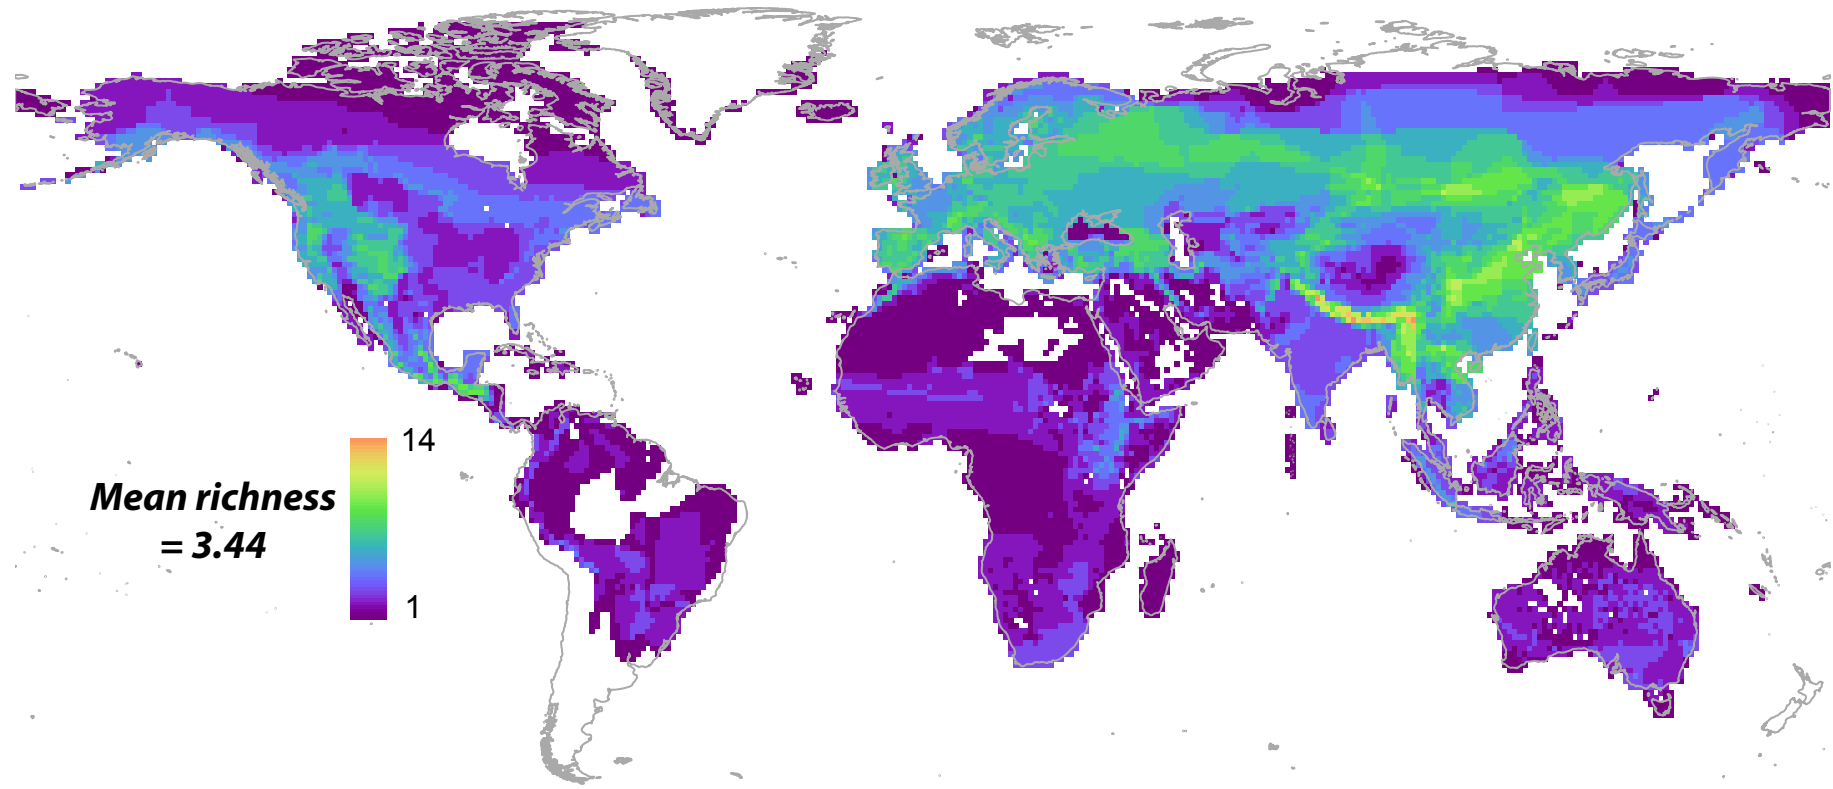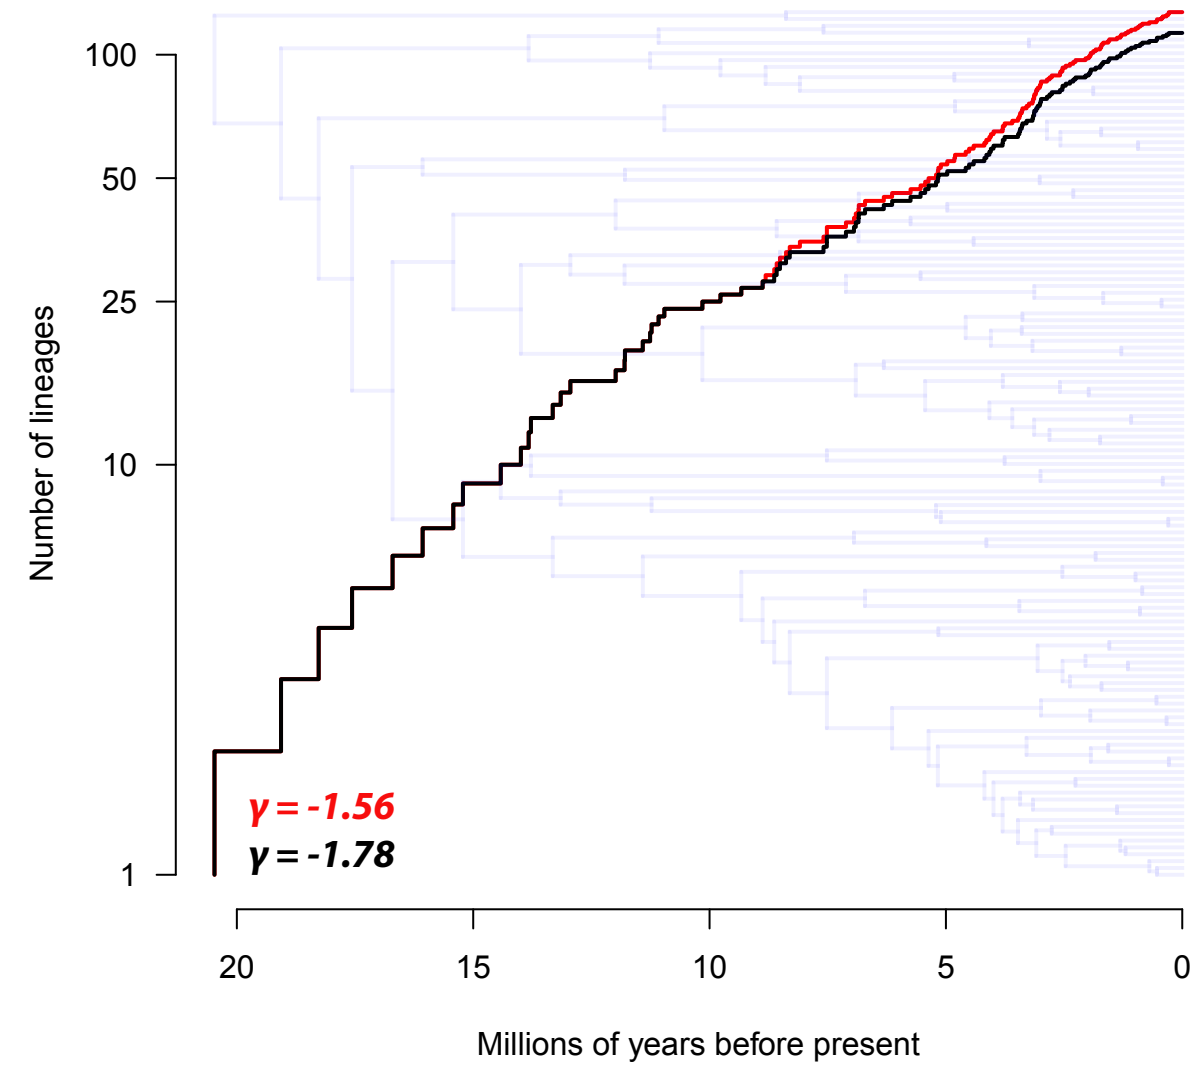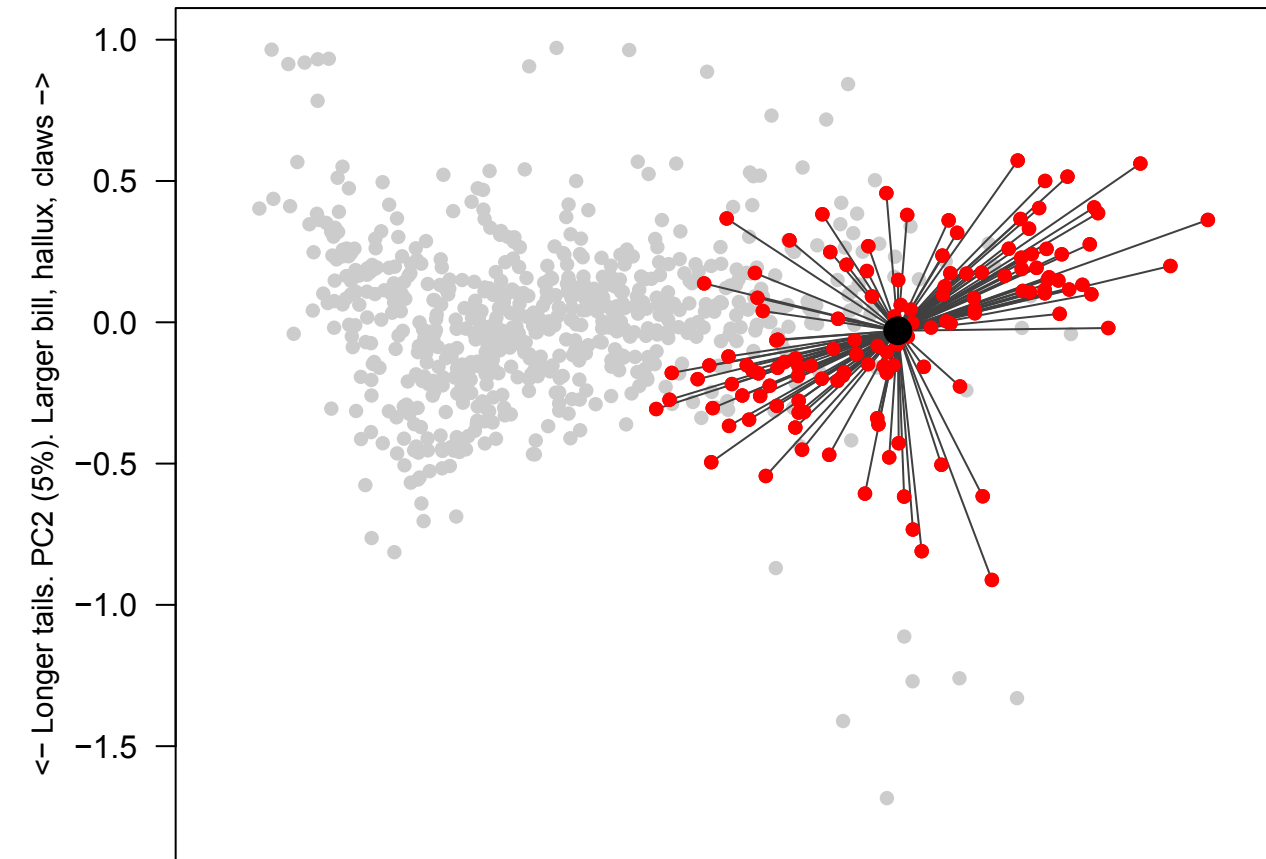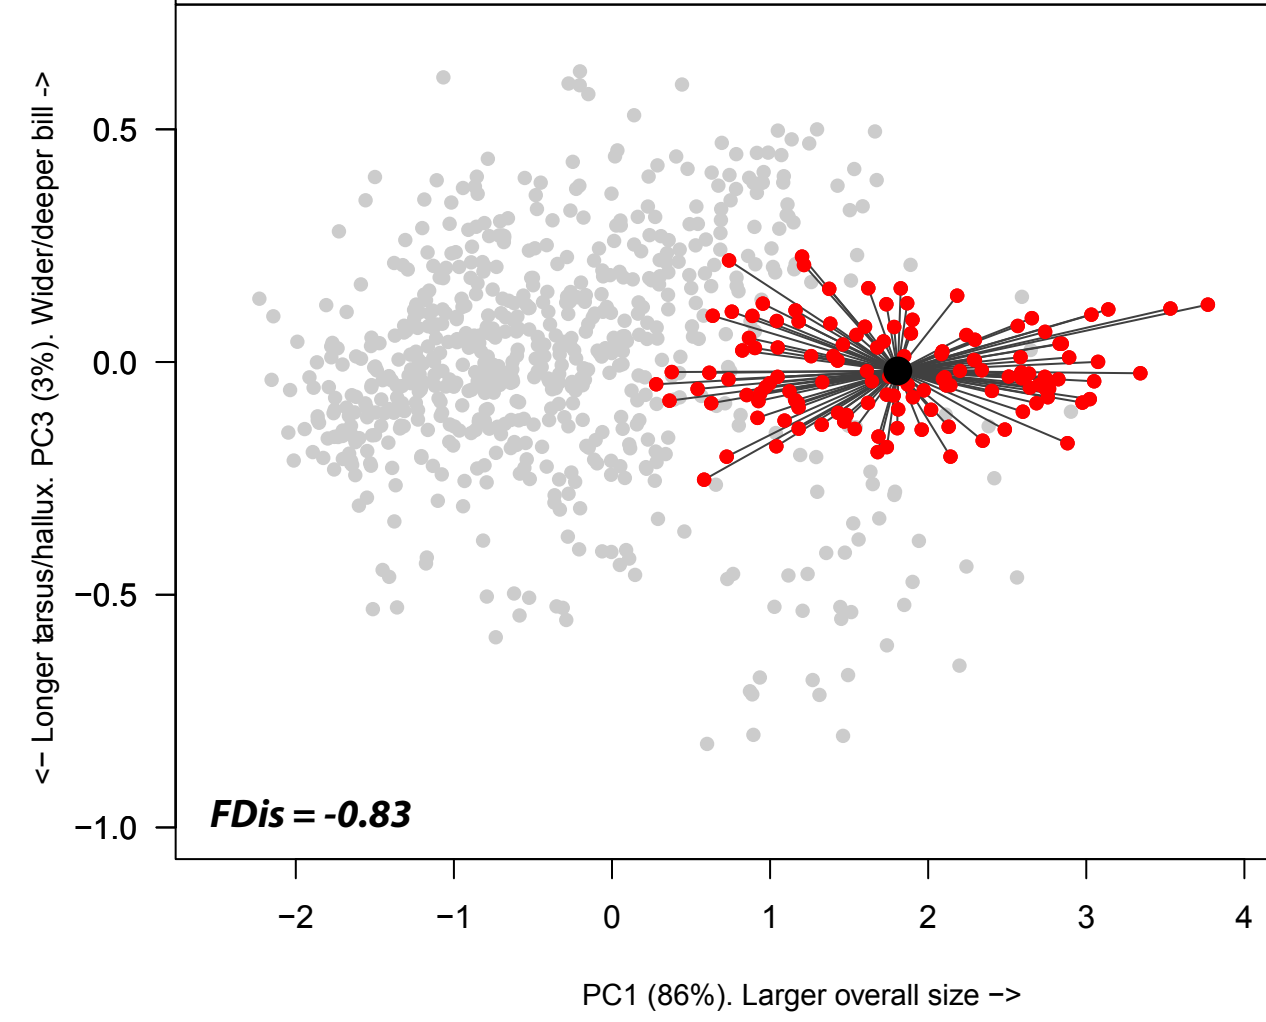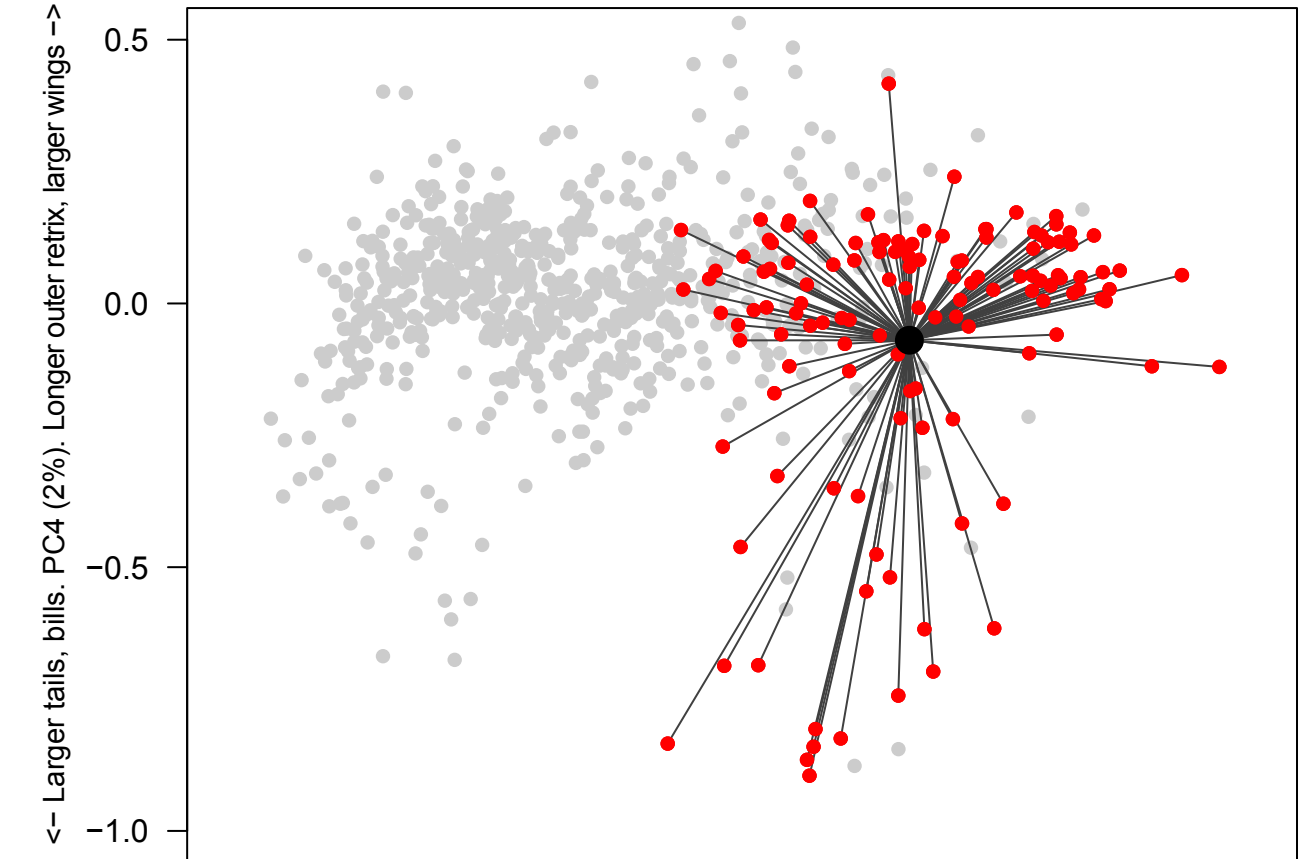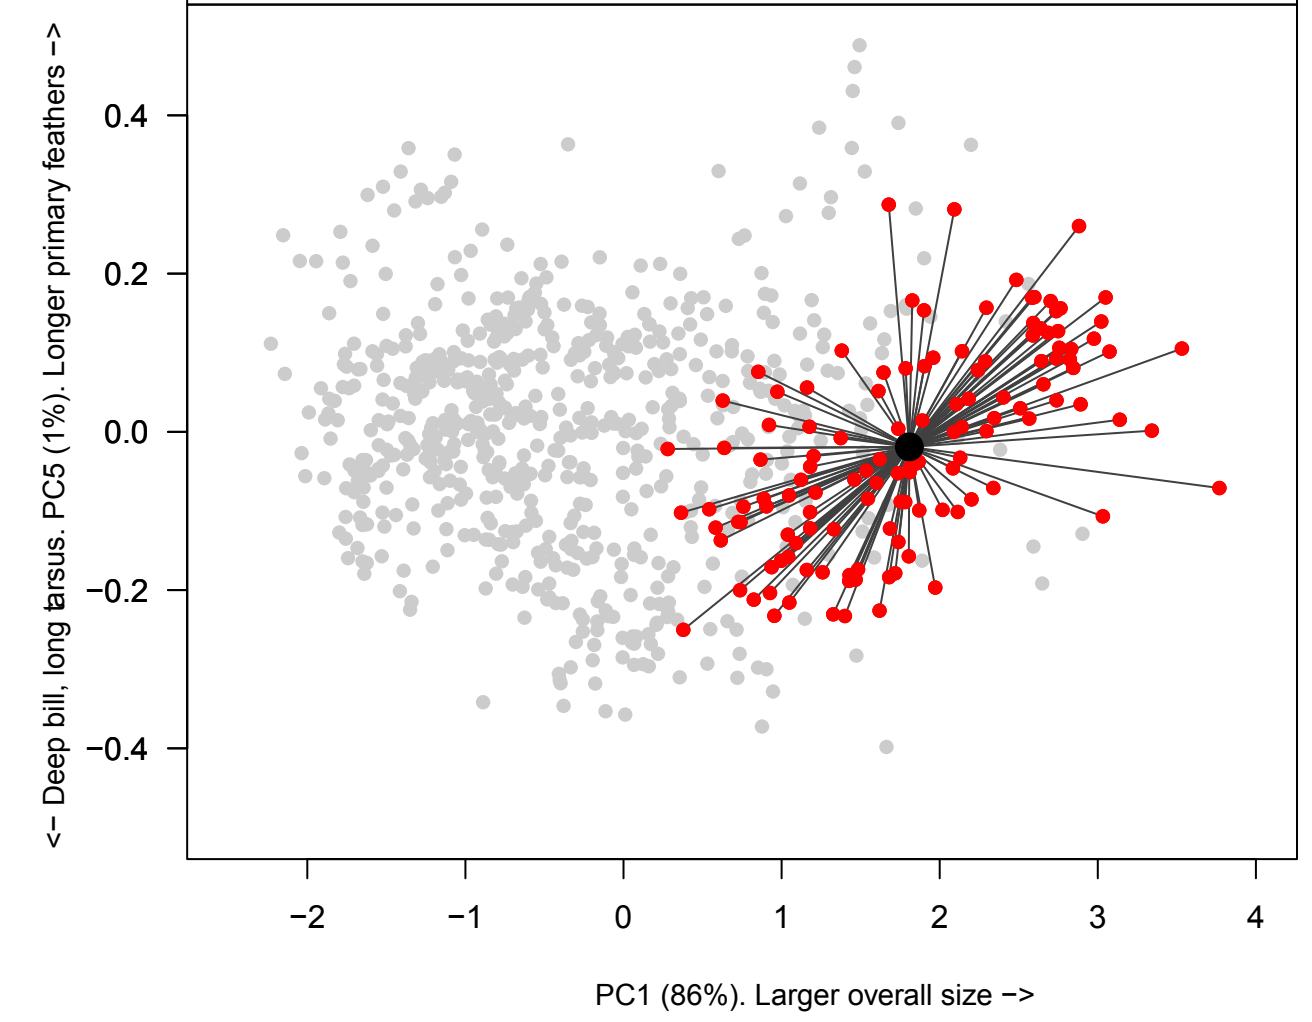

Supplement: rspb20182181supp11.pdf [file rspb20182181supp11.pdf]

e) Dicruridae - 24 species

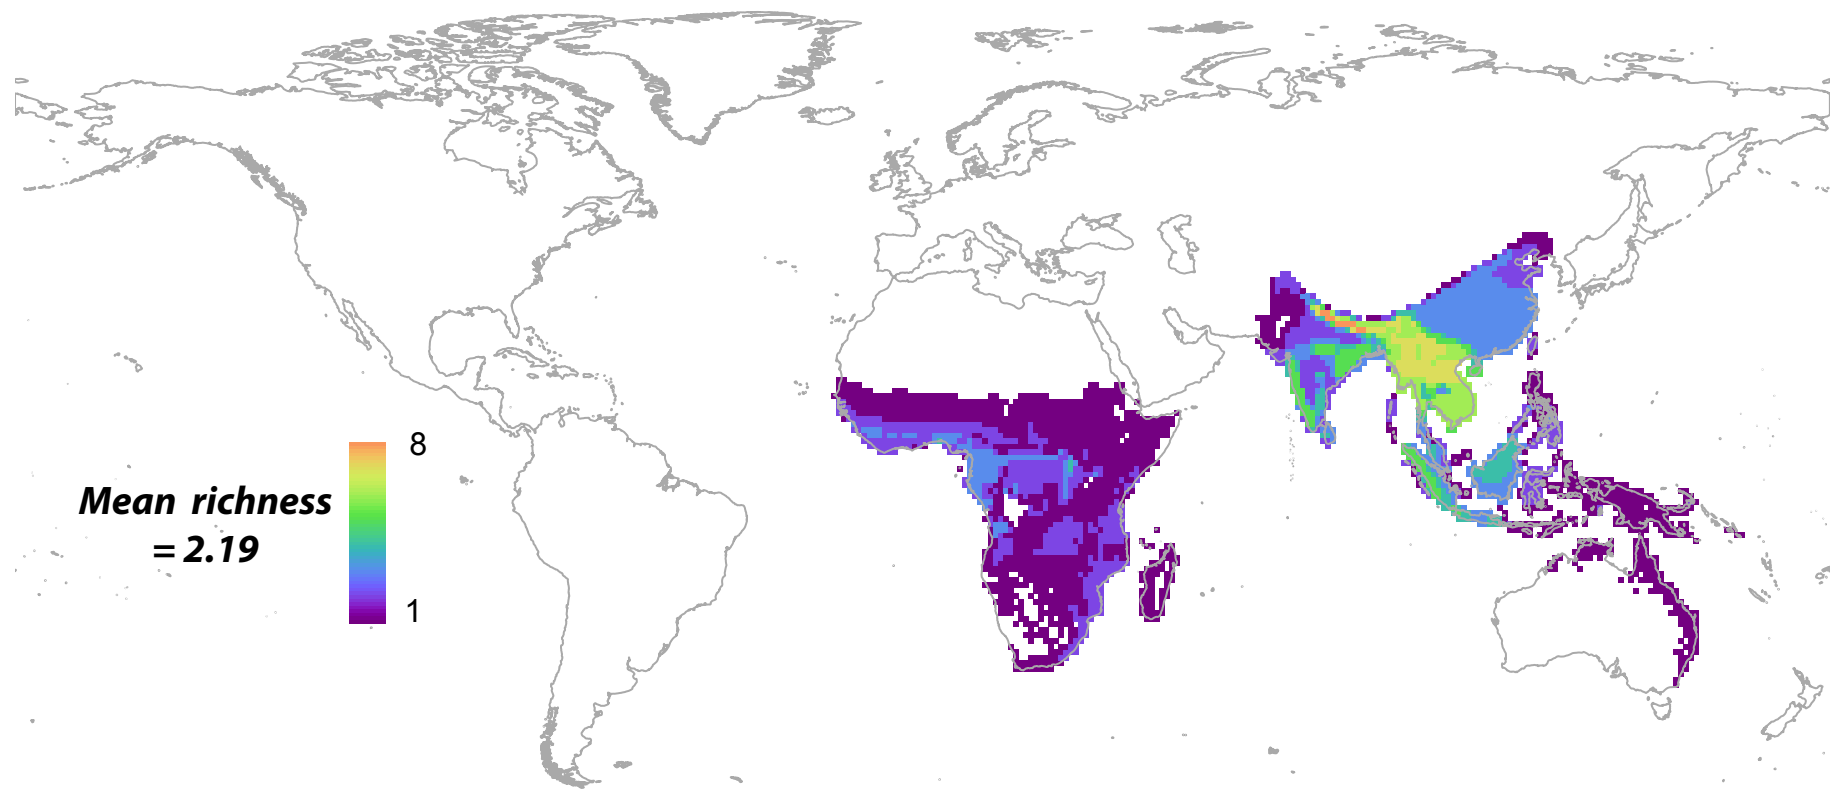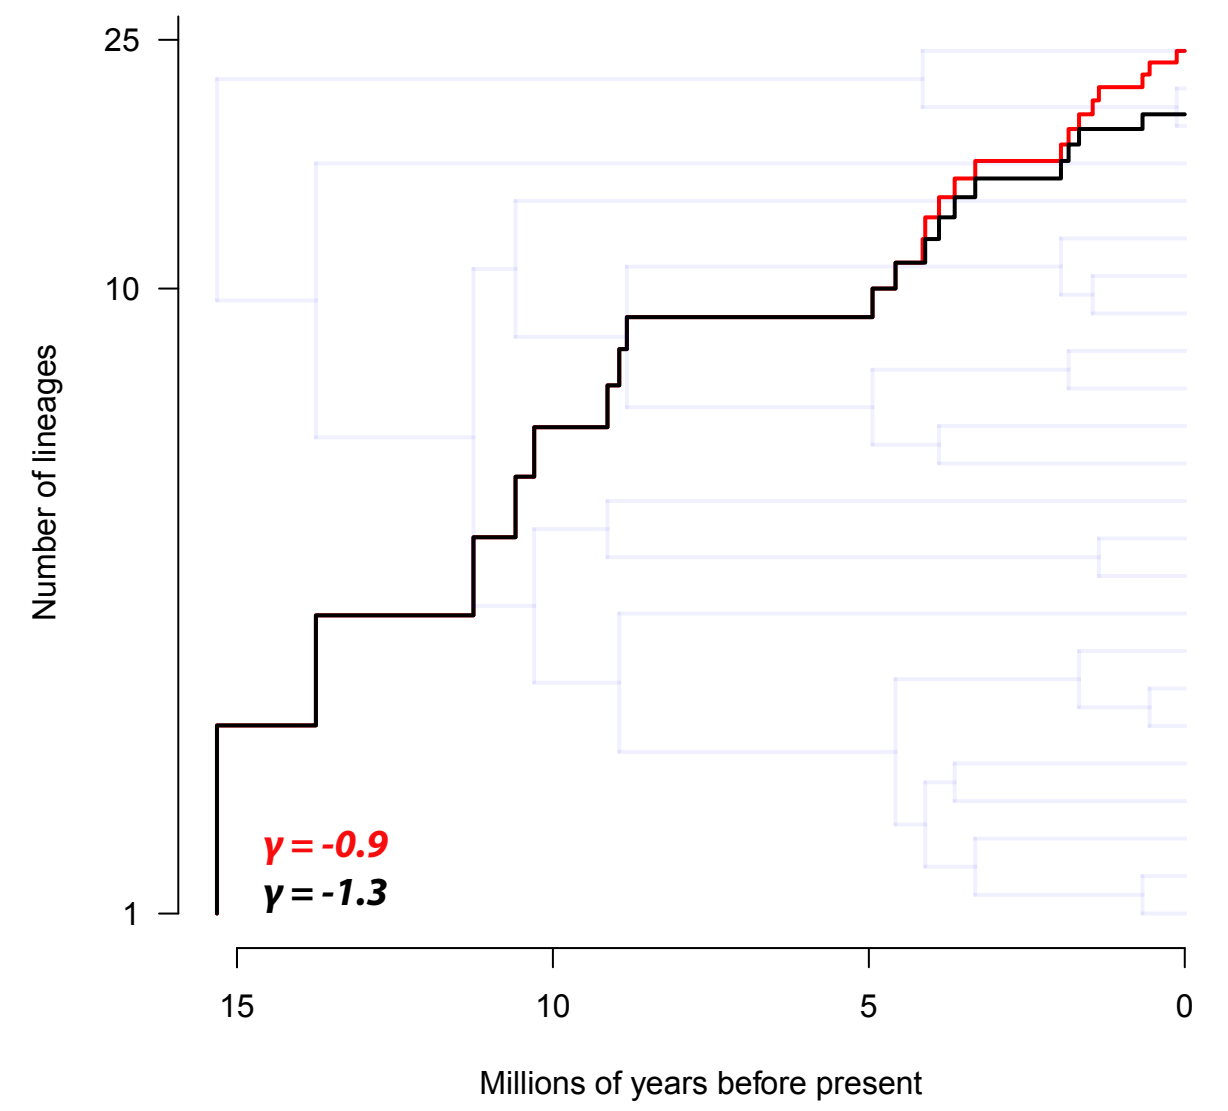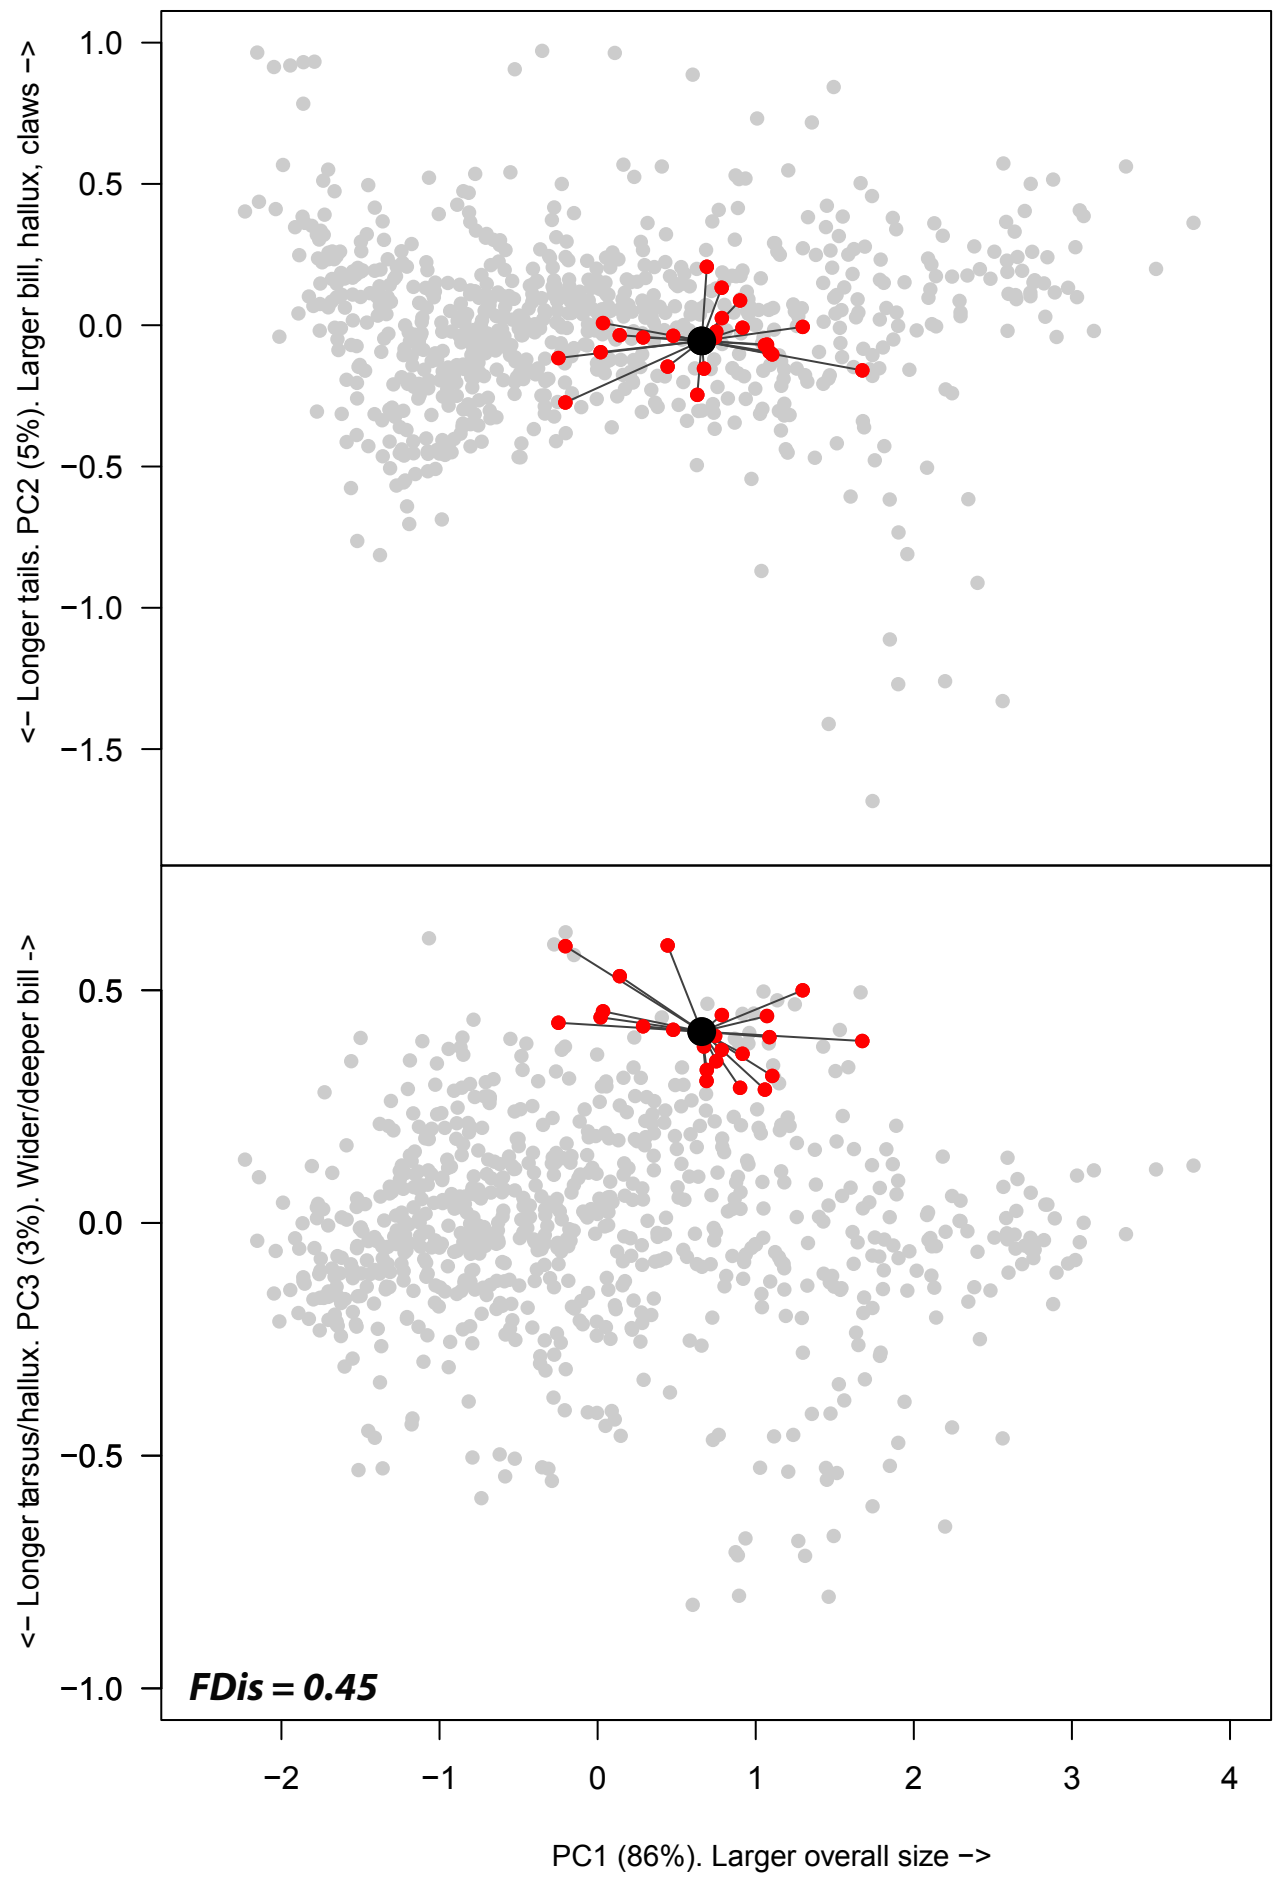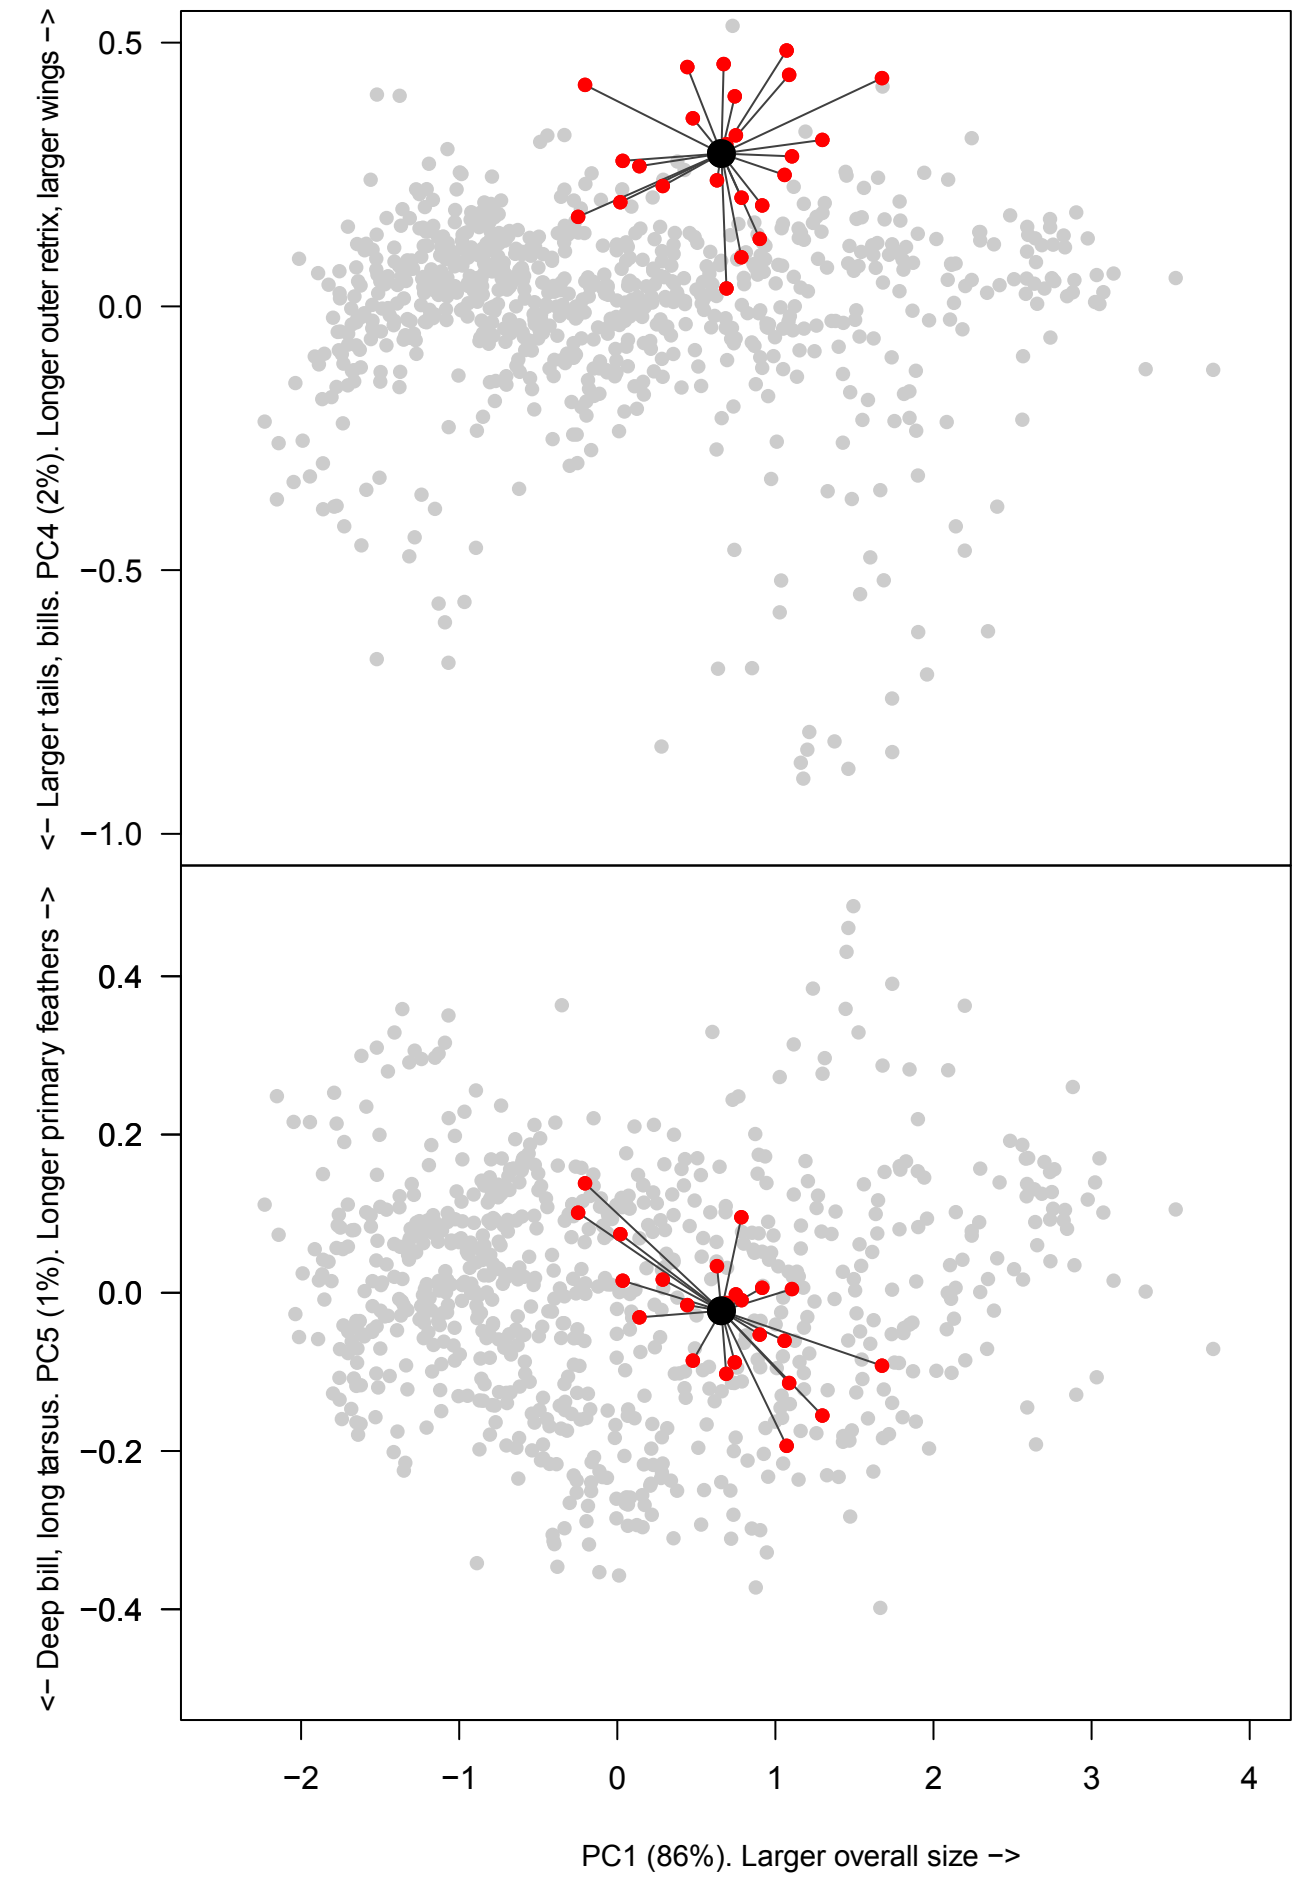

Supplement: rspb20182181supp12.pdf [file rspb20182181supp12.pdf]

# f) Laniidae - 34 species

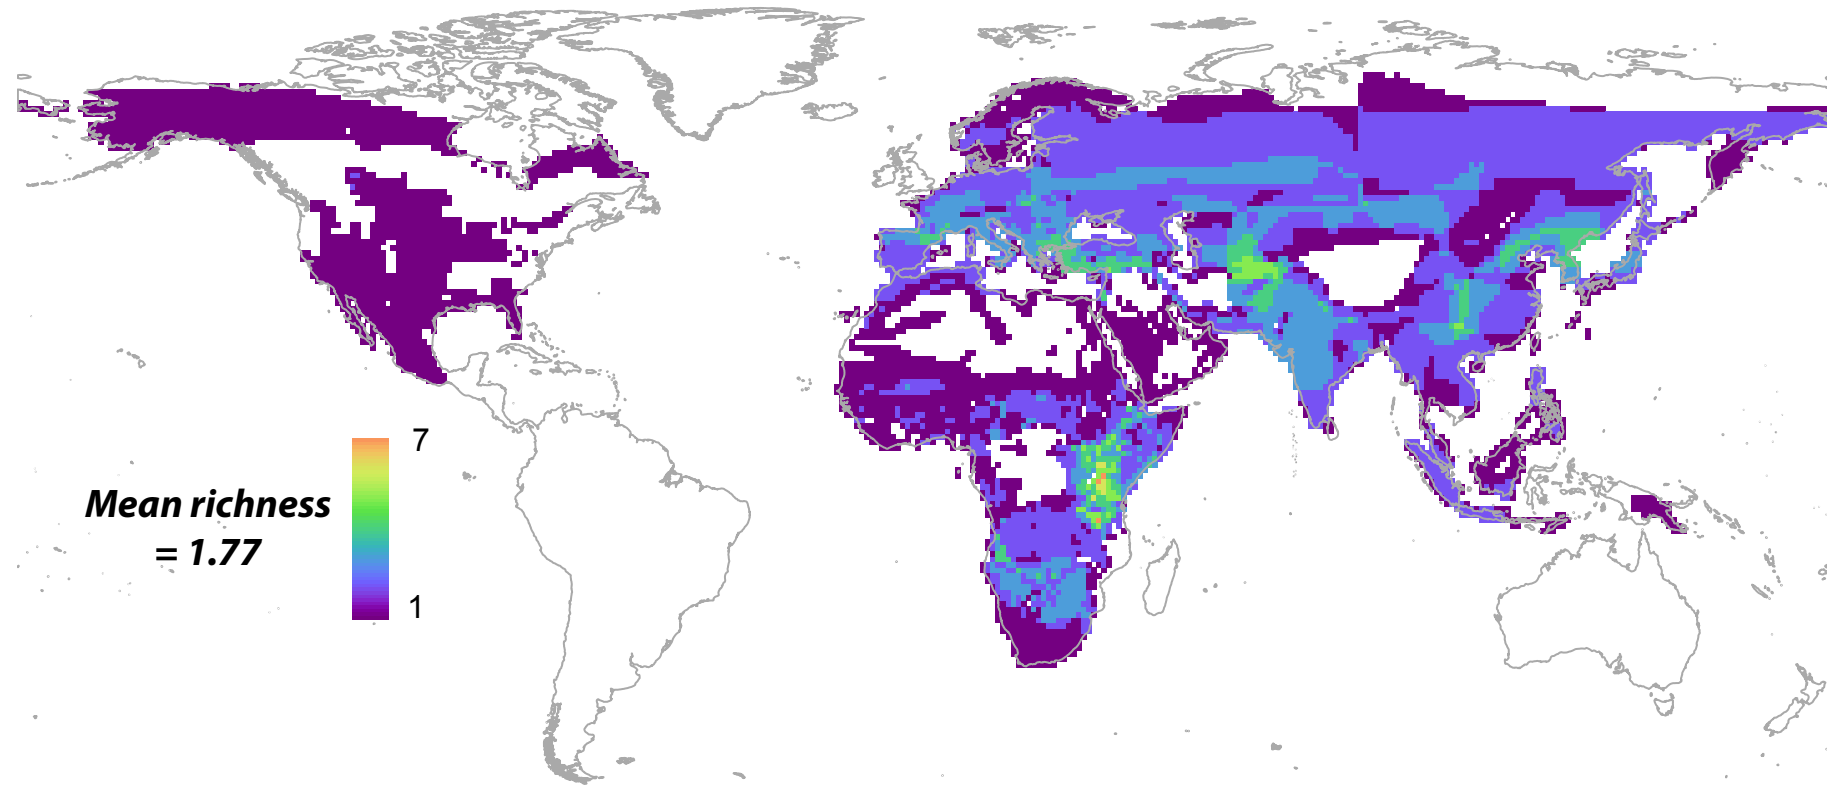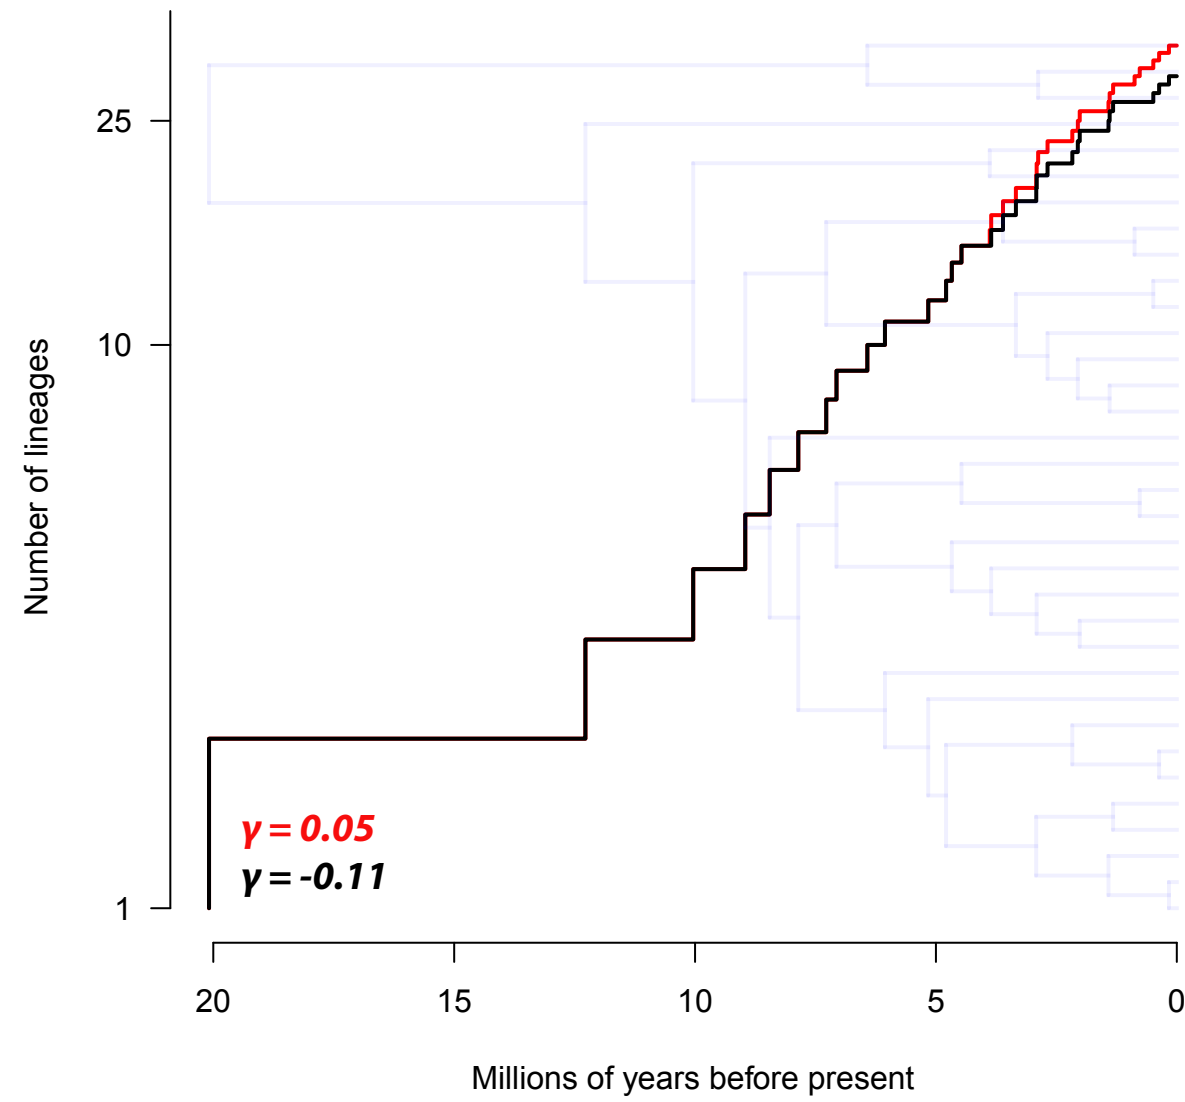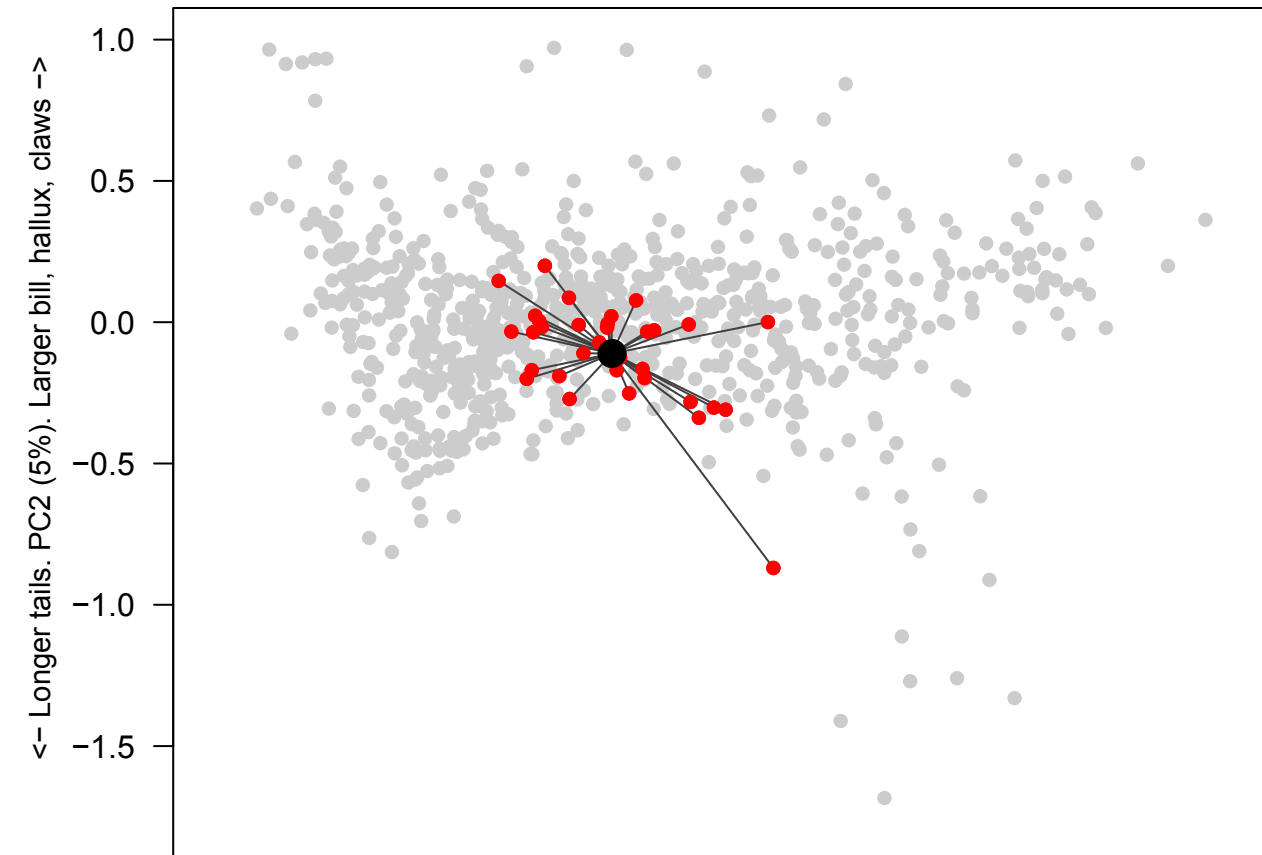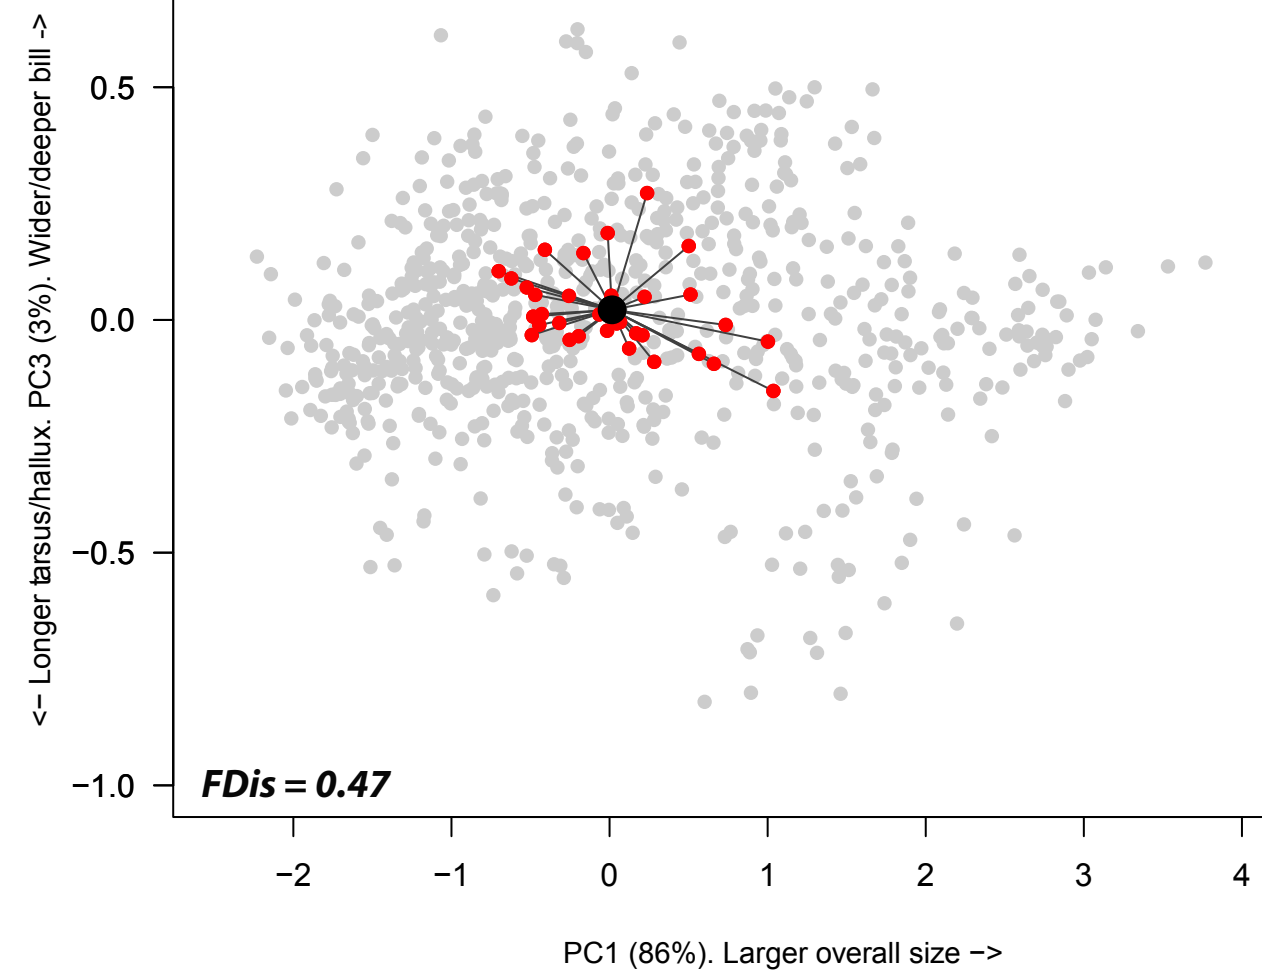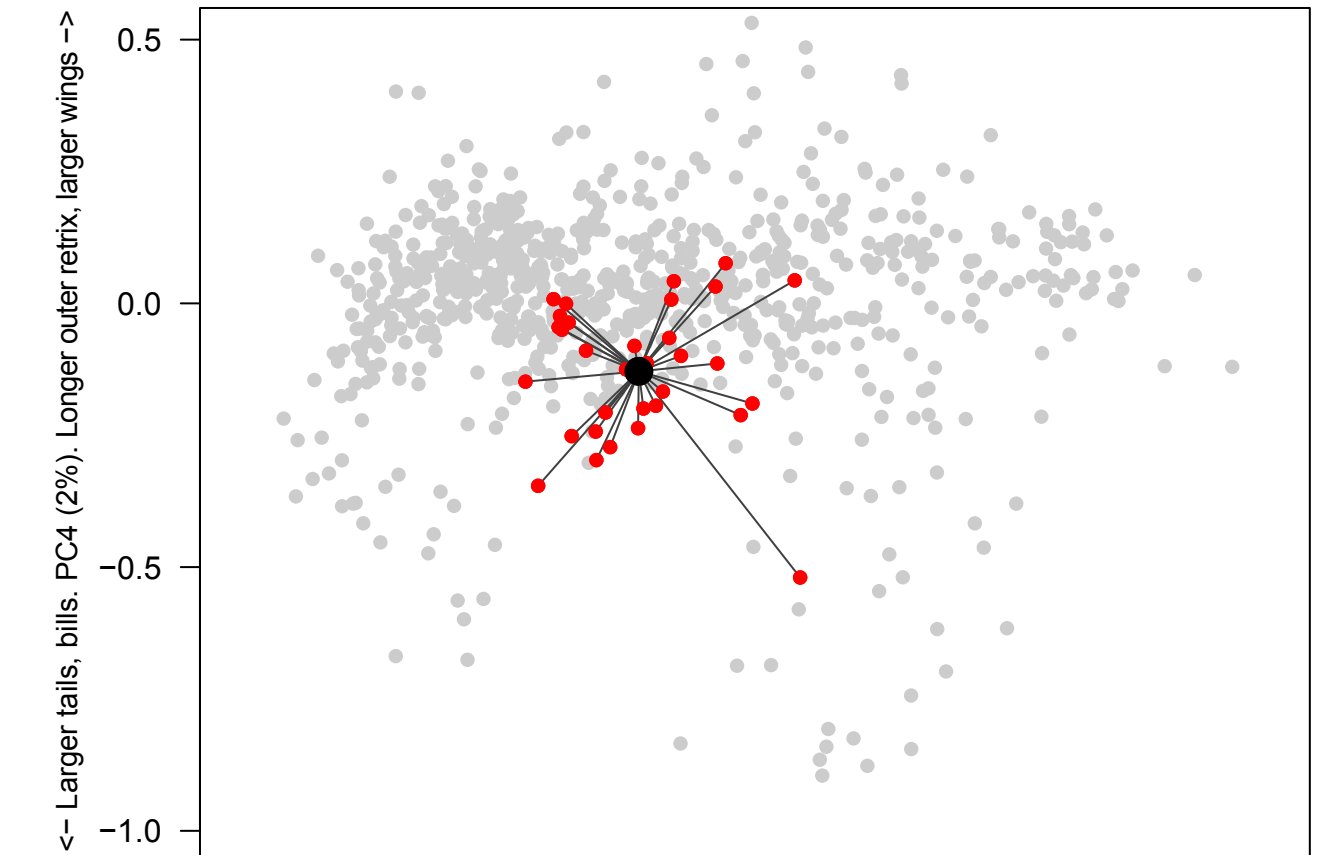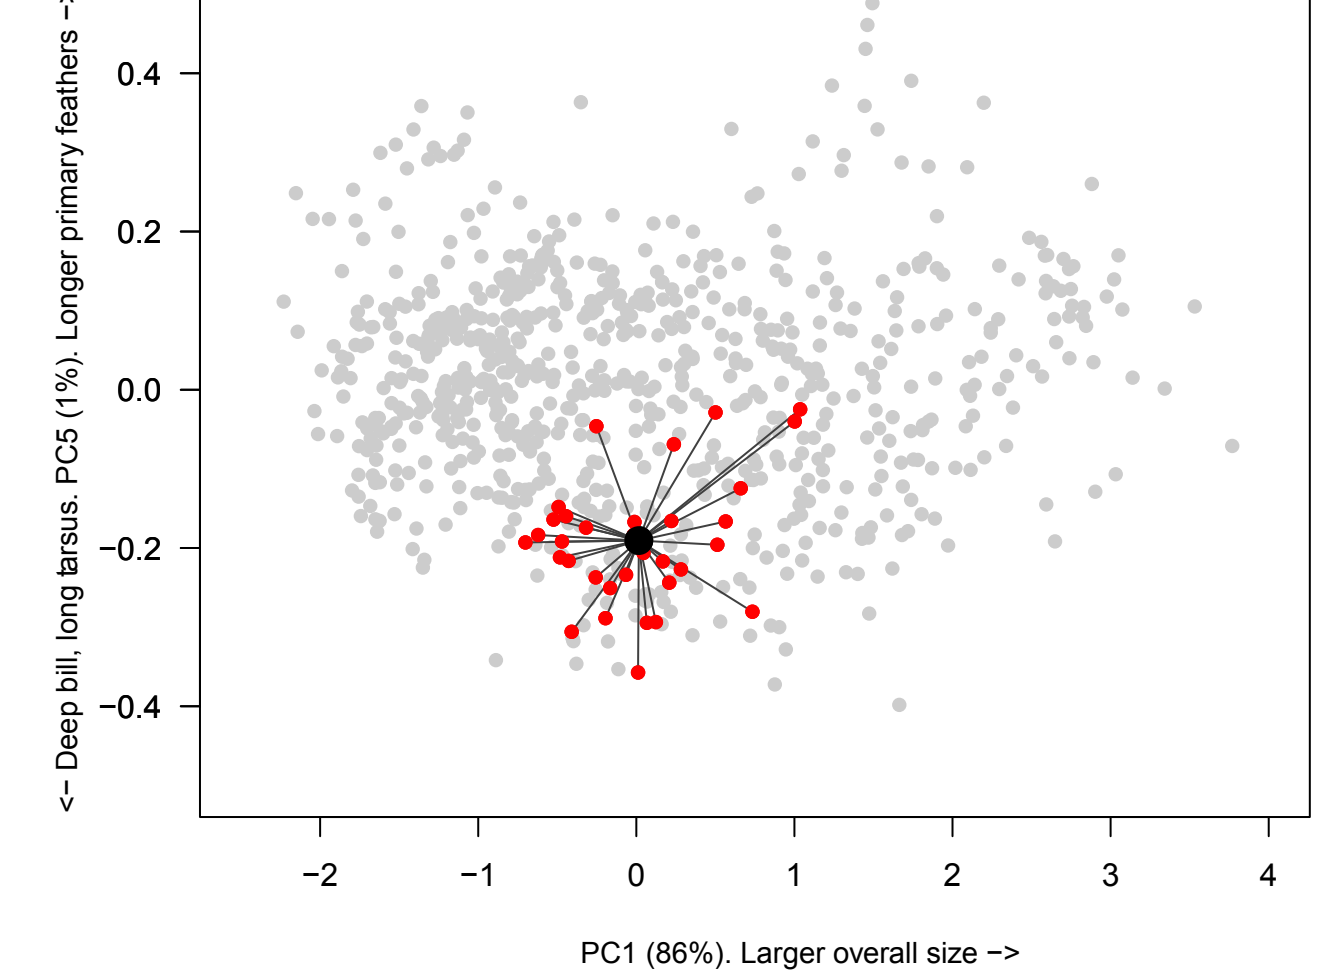

Supplement: rspb20182181supp13.pdf [file rspb20182181supp13.pdf]

g) Malaconotidae - 50 species

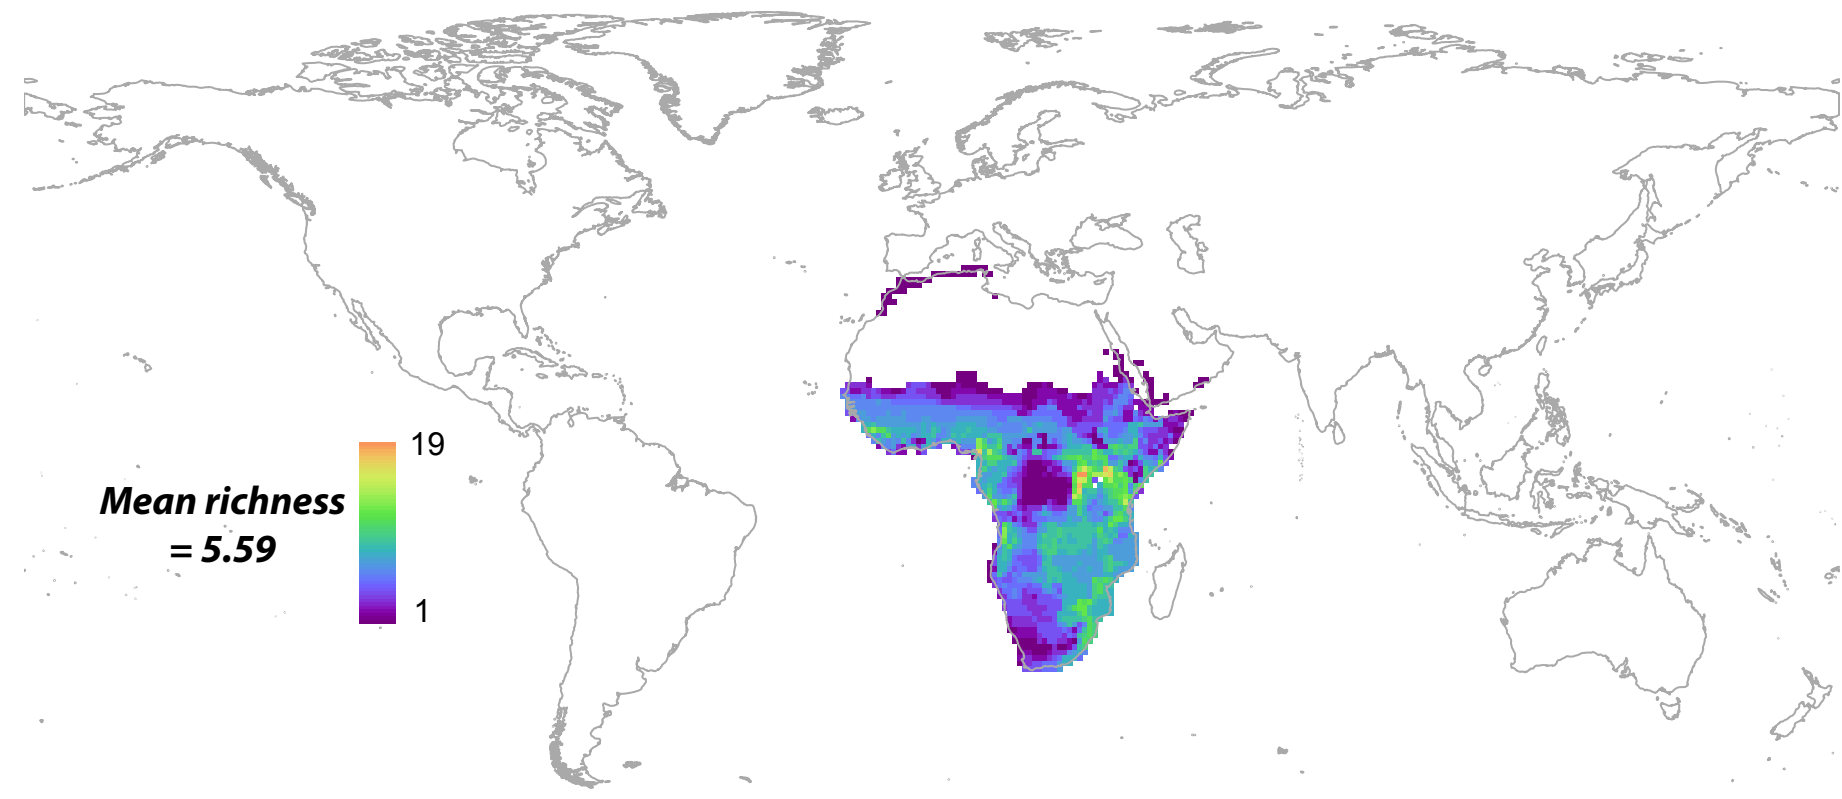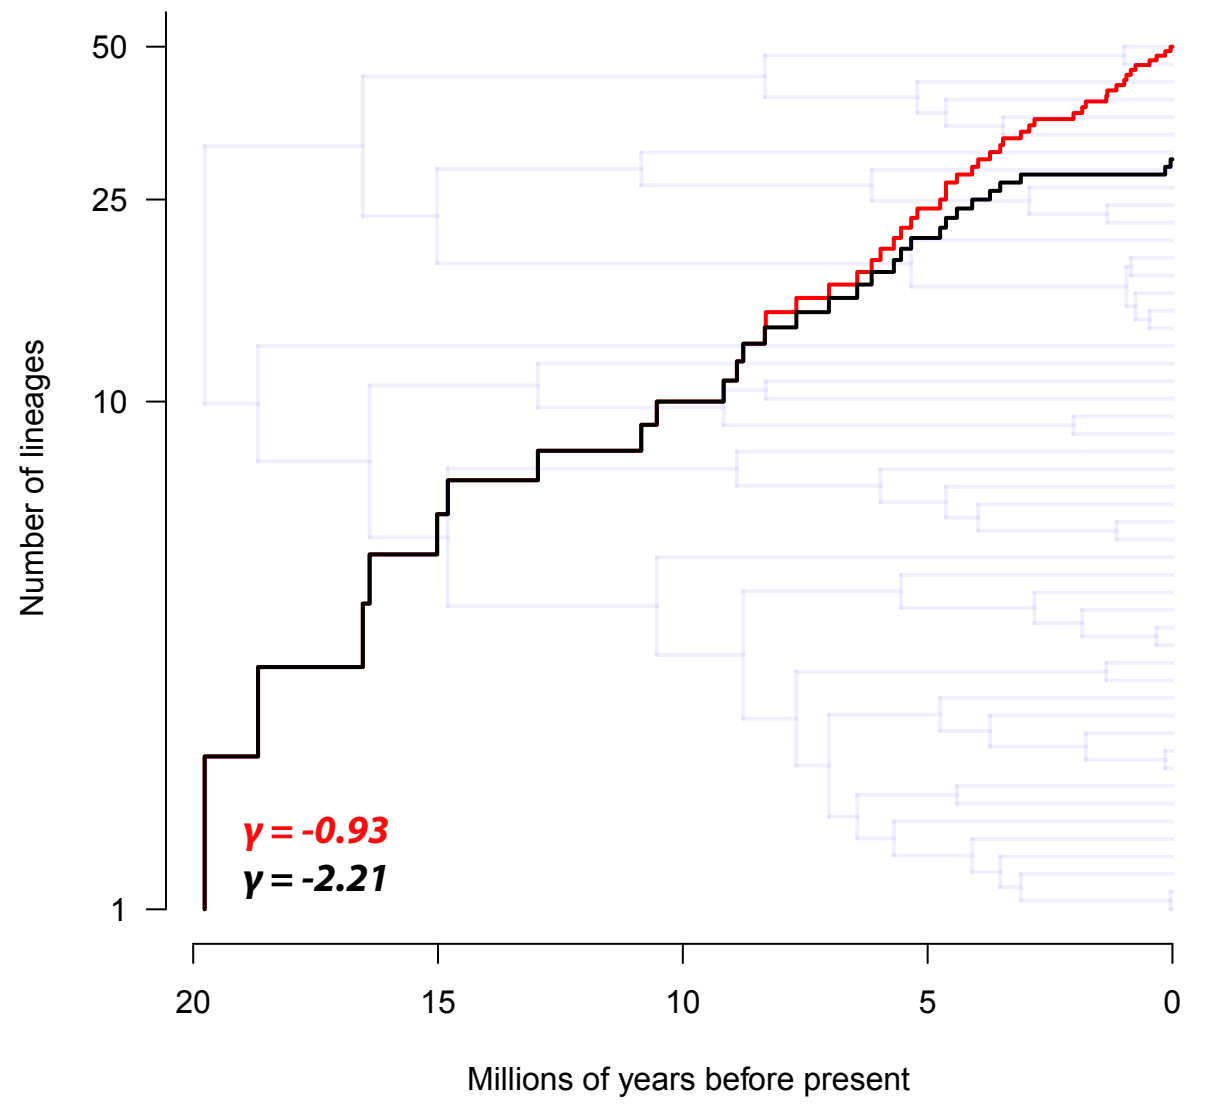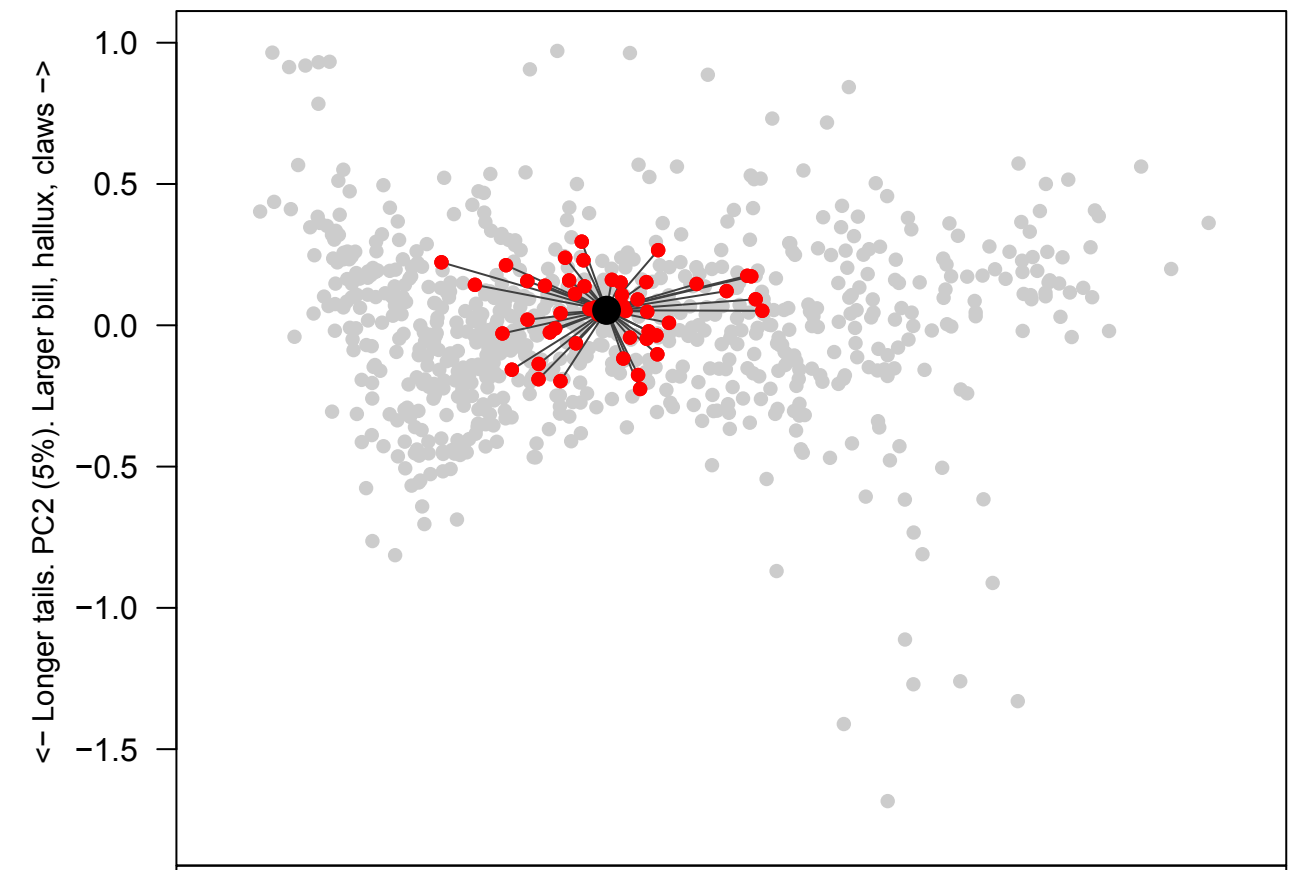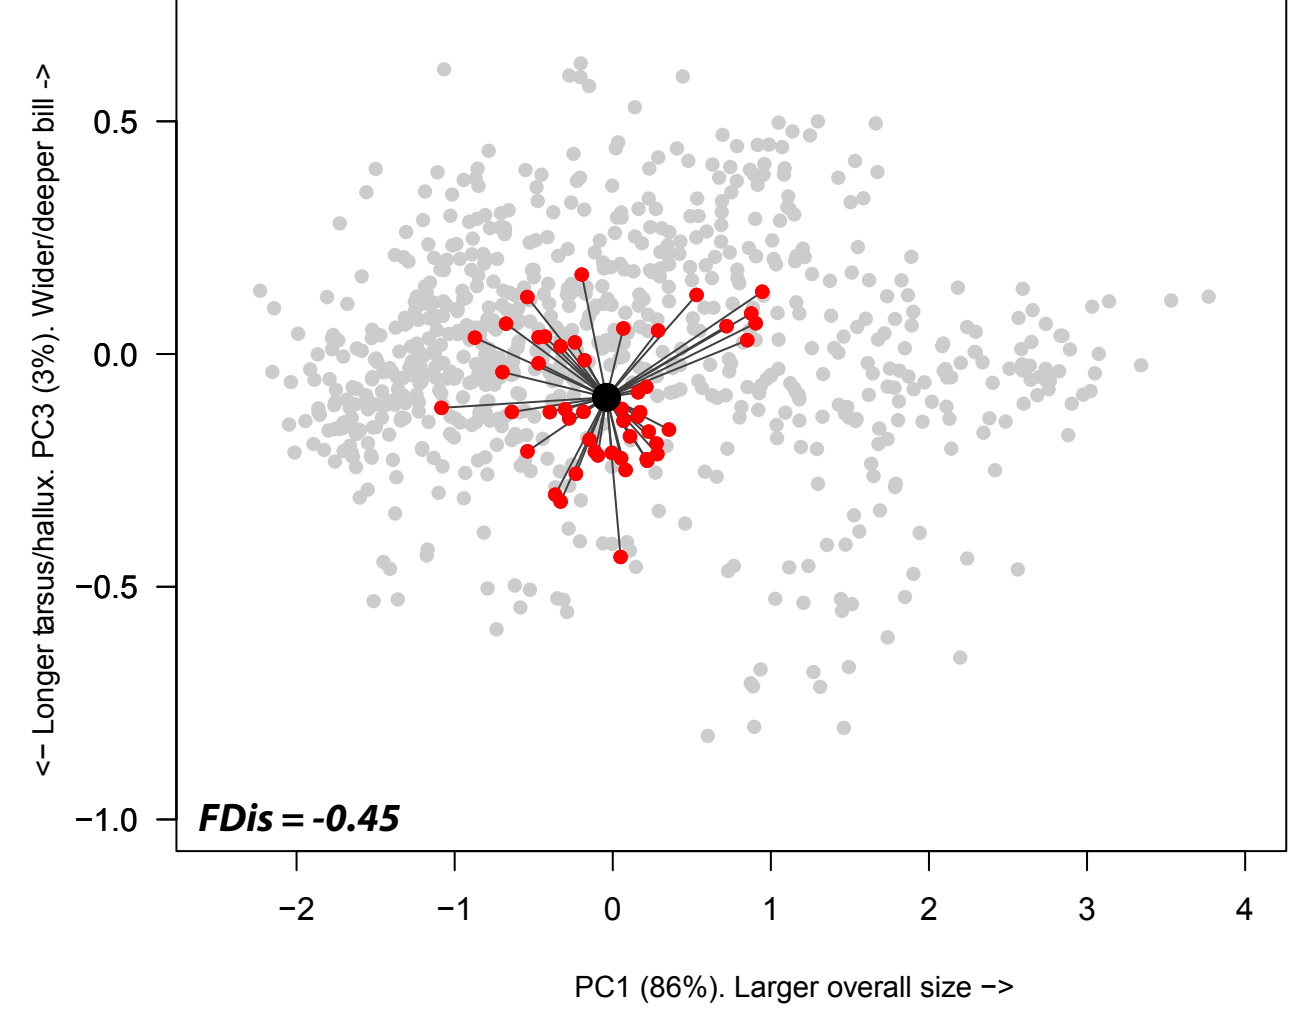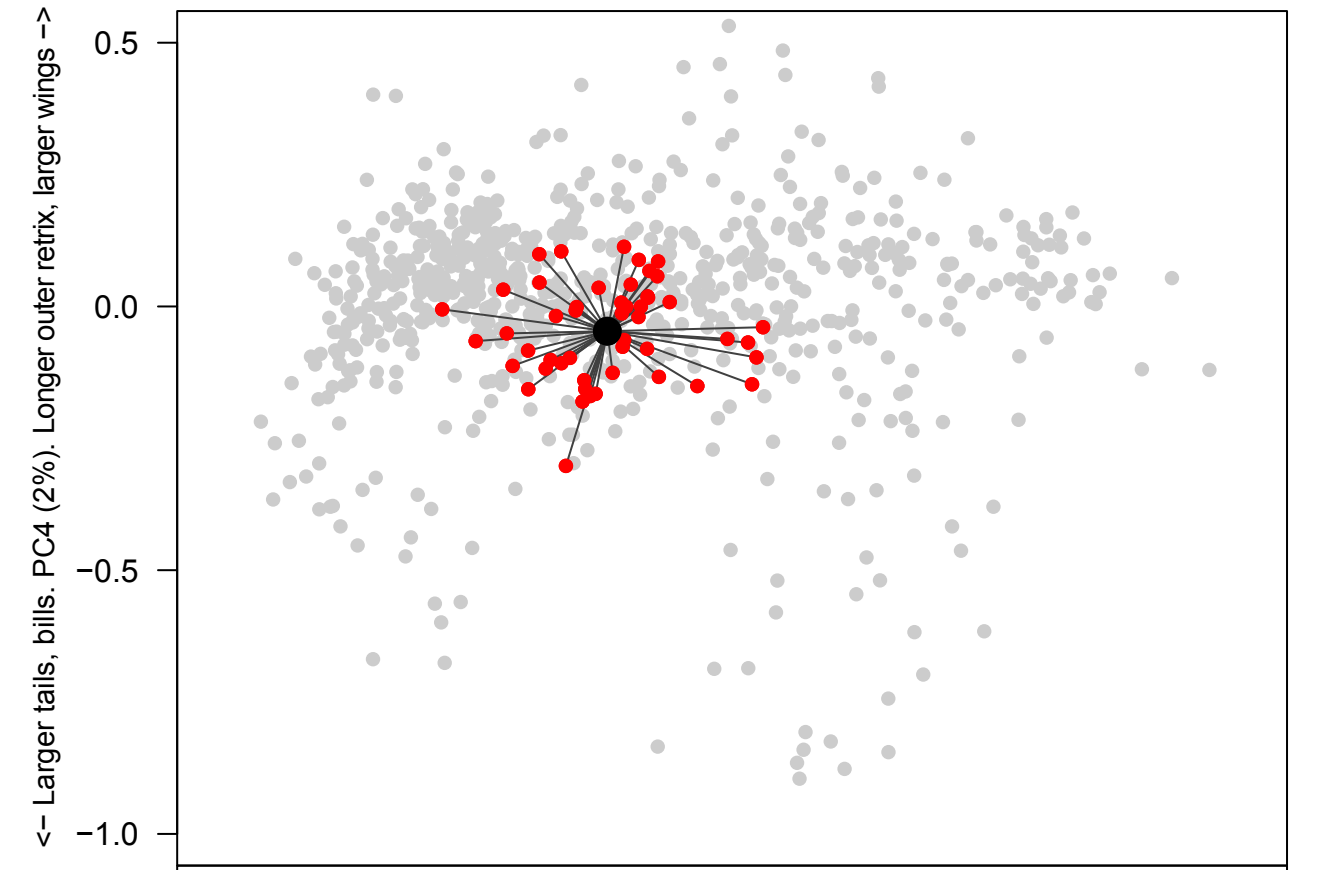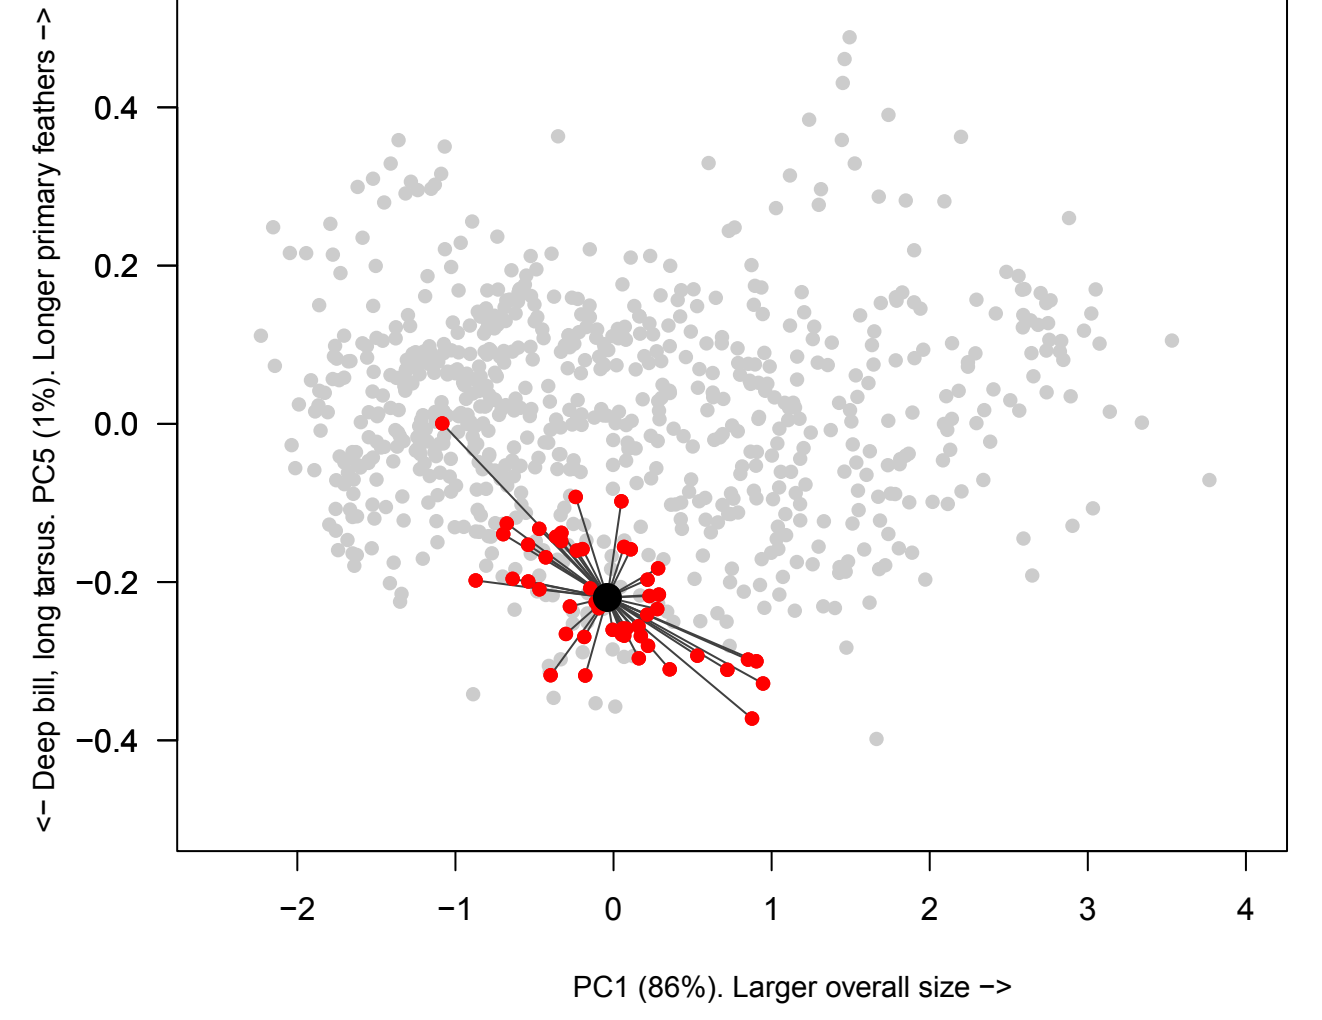

Supplement: rspb20182181supp14.pdf [file rspb20182181supp14.pdf]

# h) Monarchidae - 94 species

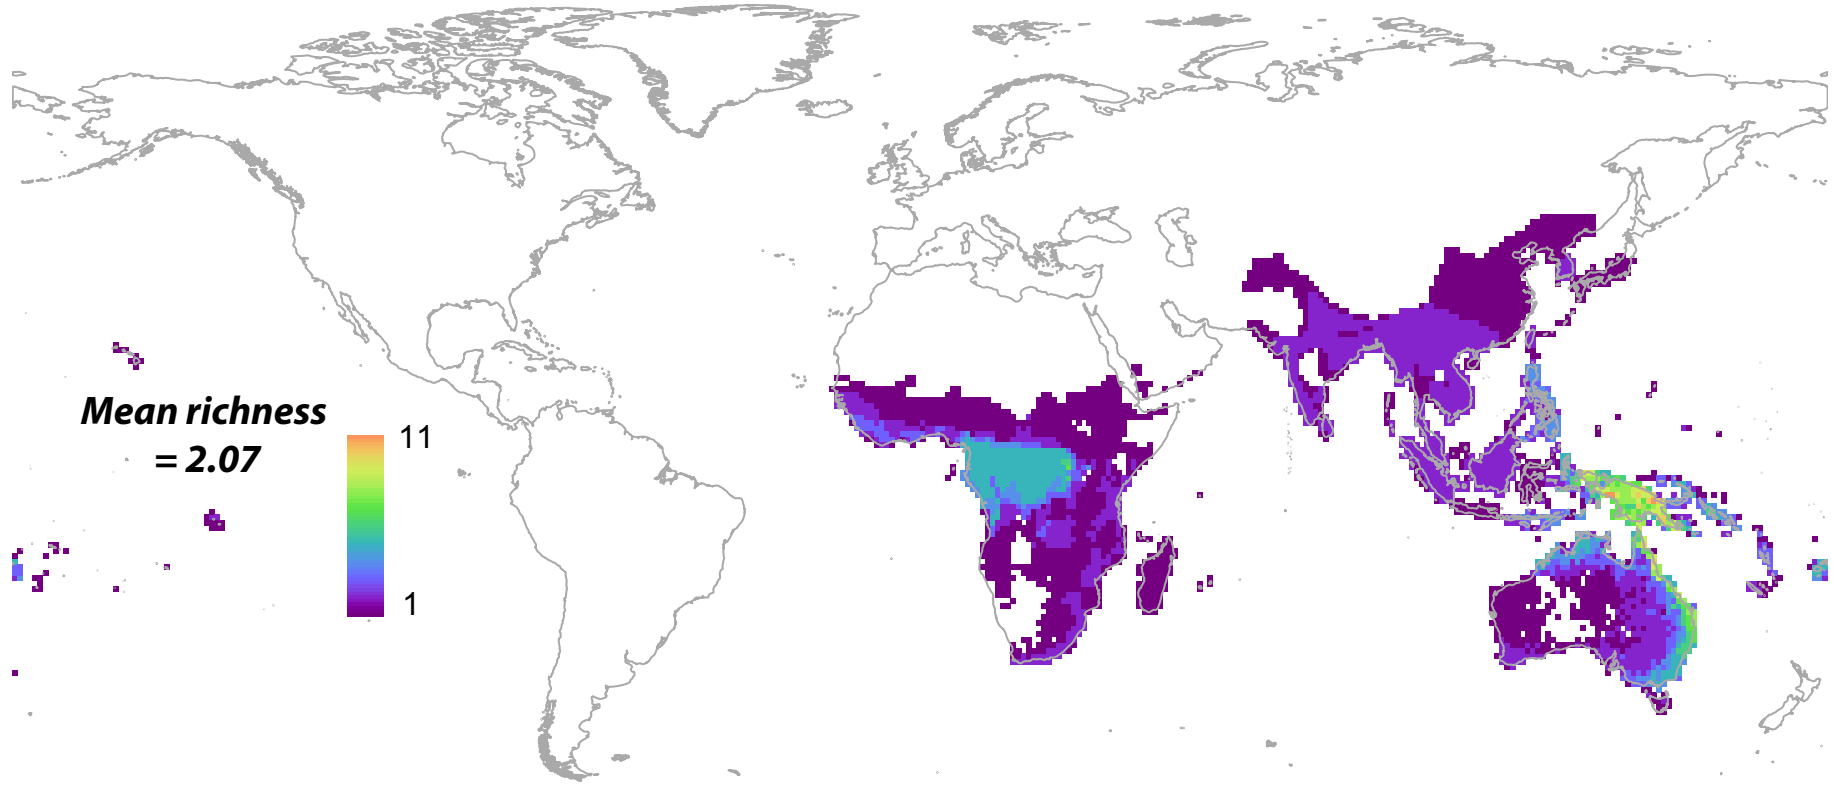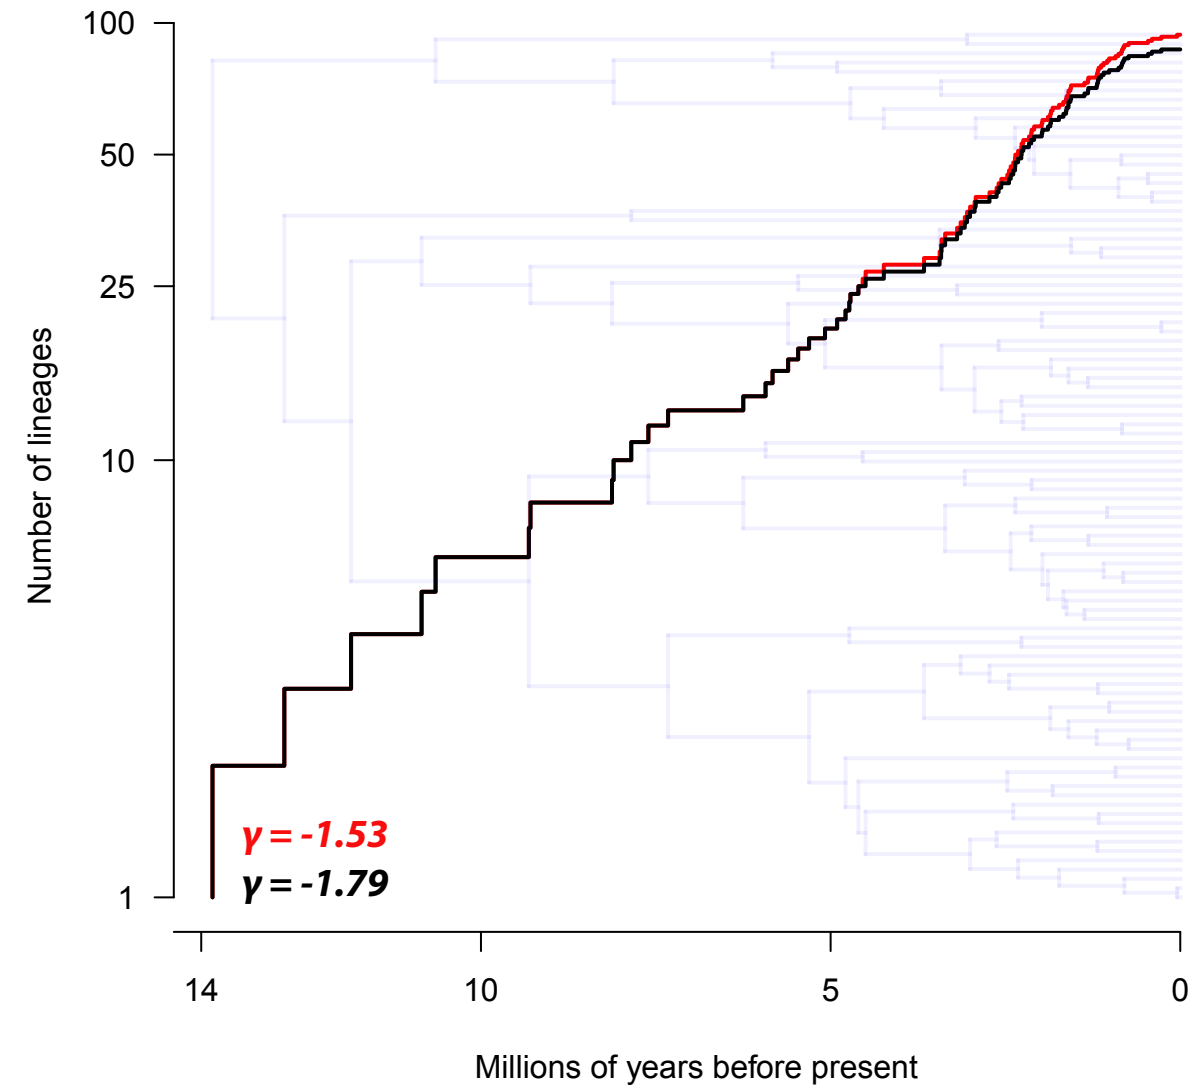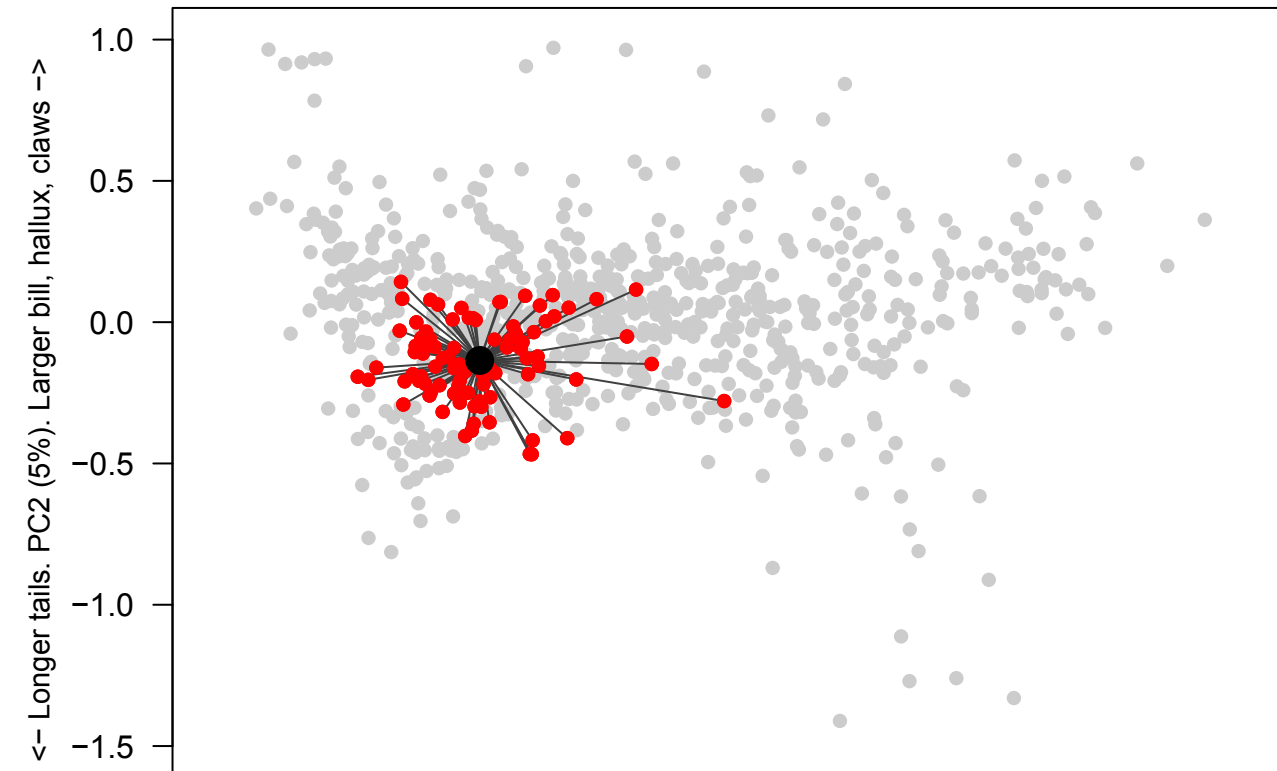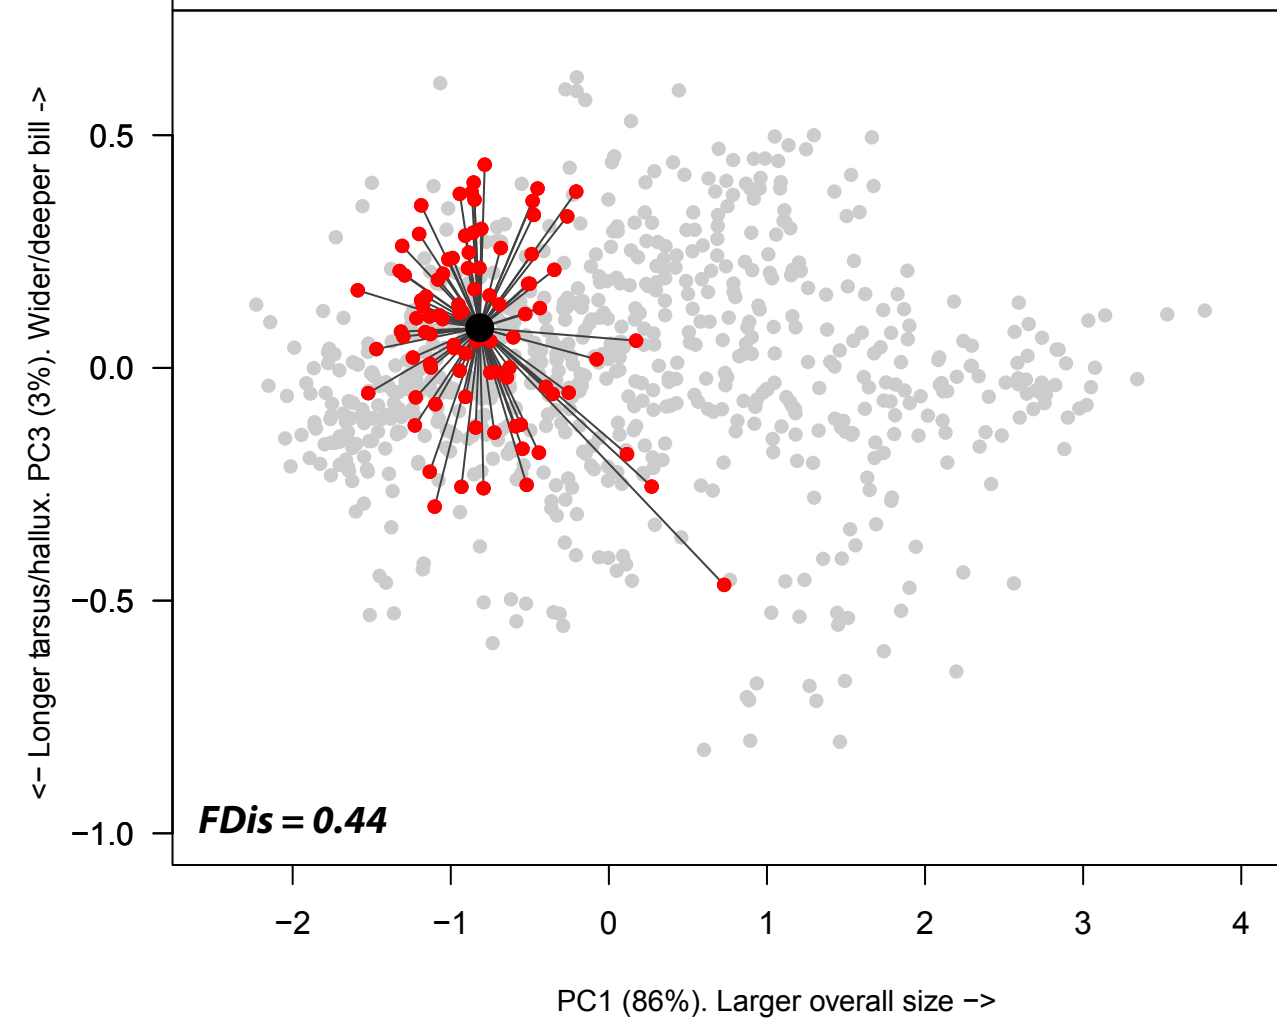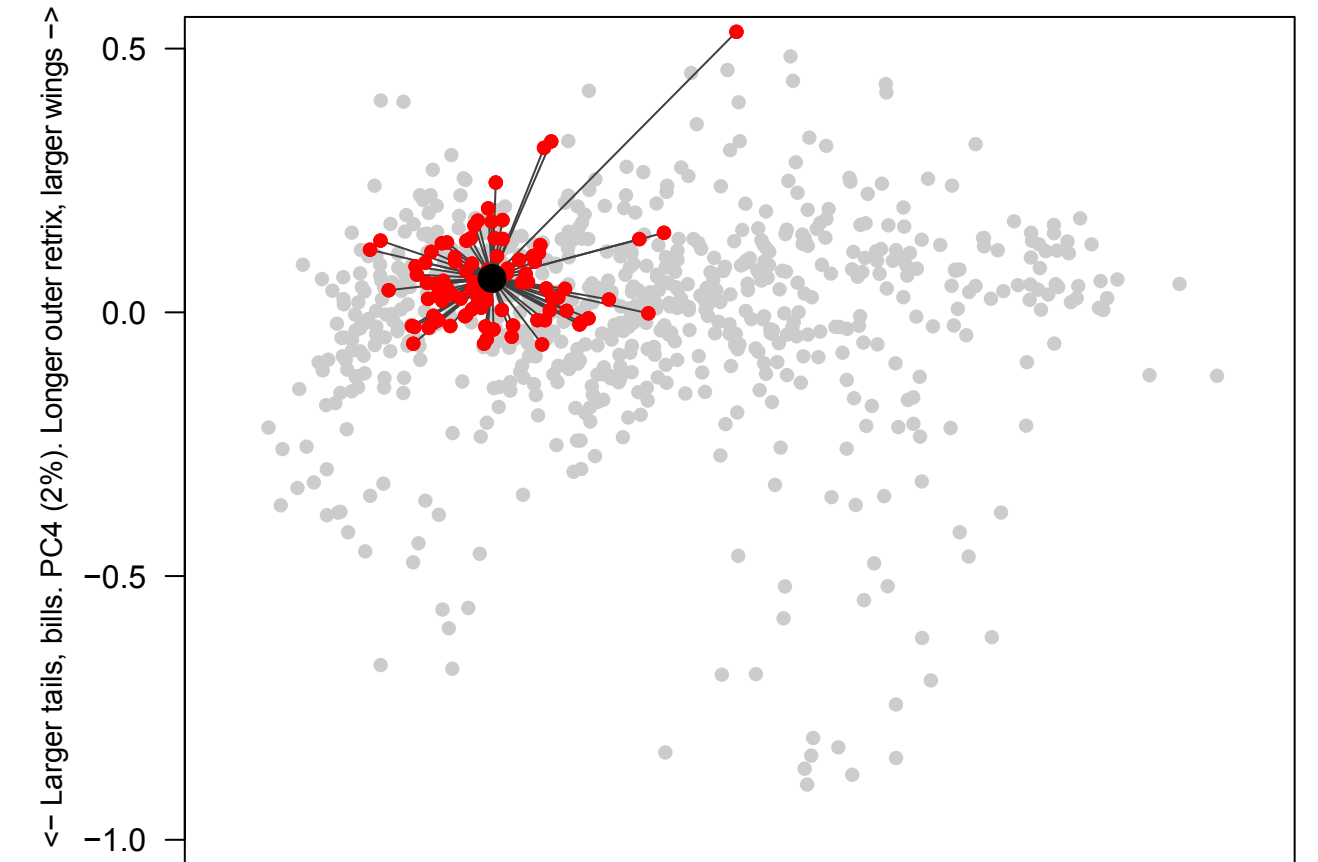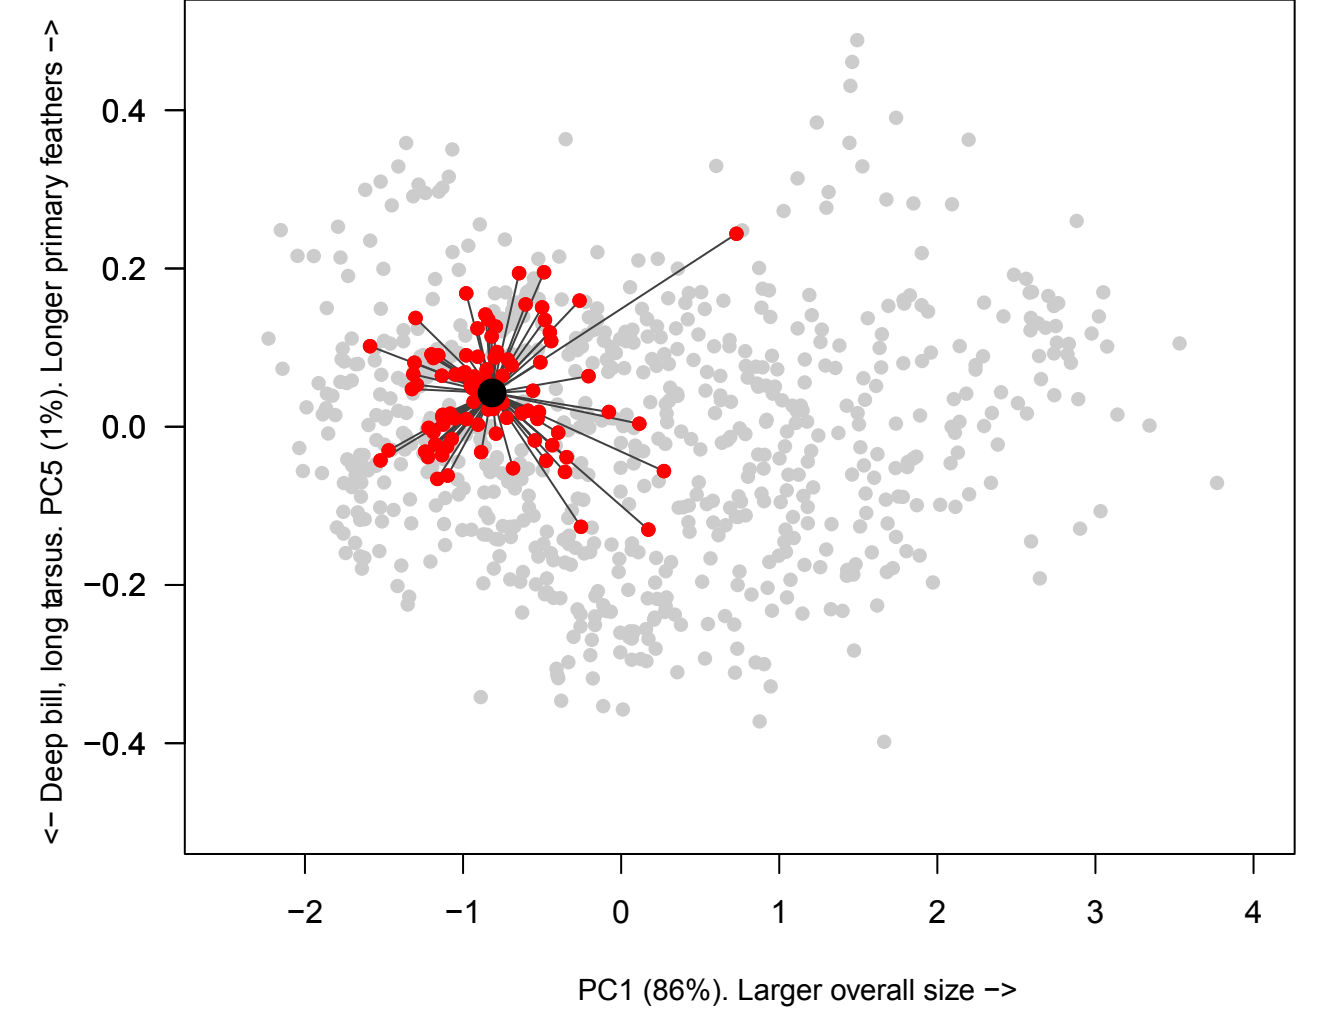

Supplement: rspb20182181supp15.pdf [file rspb20182181supp15.pdf]

# i) Oriolidae - 35 species

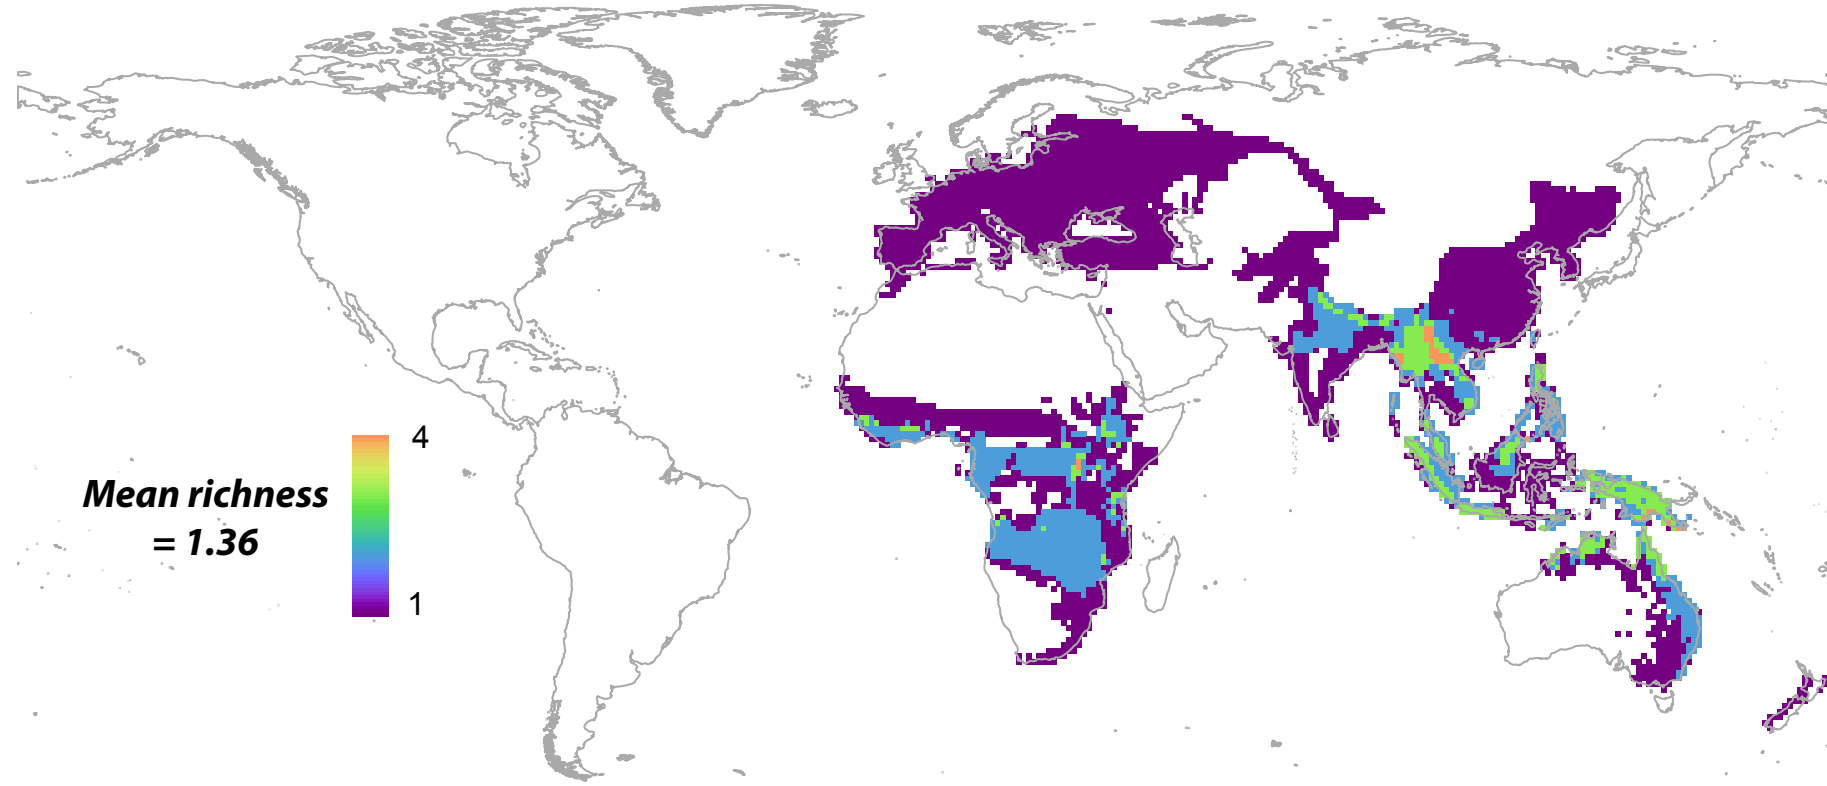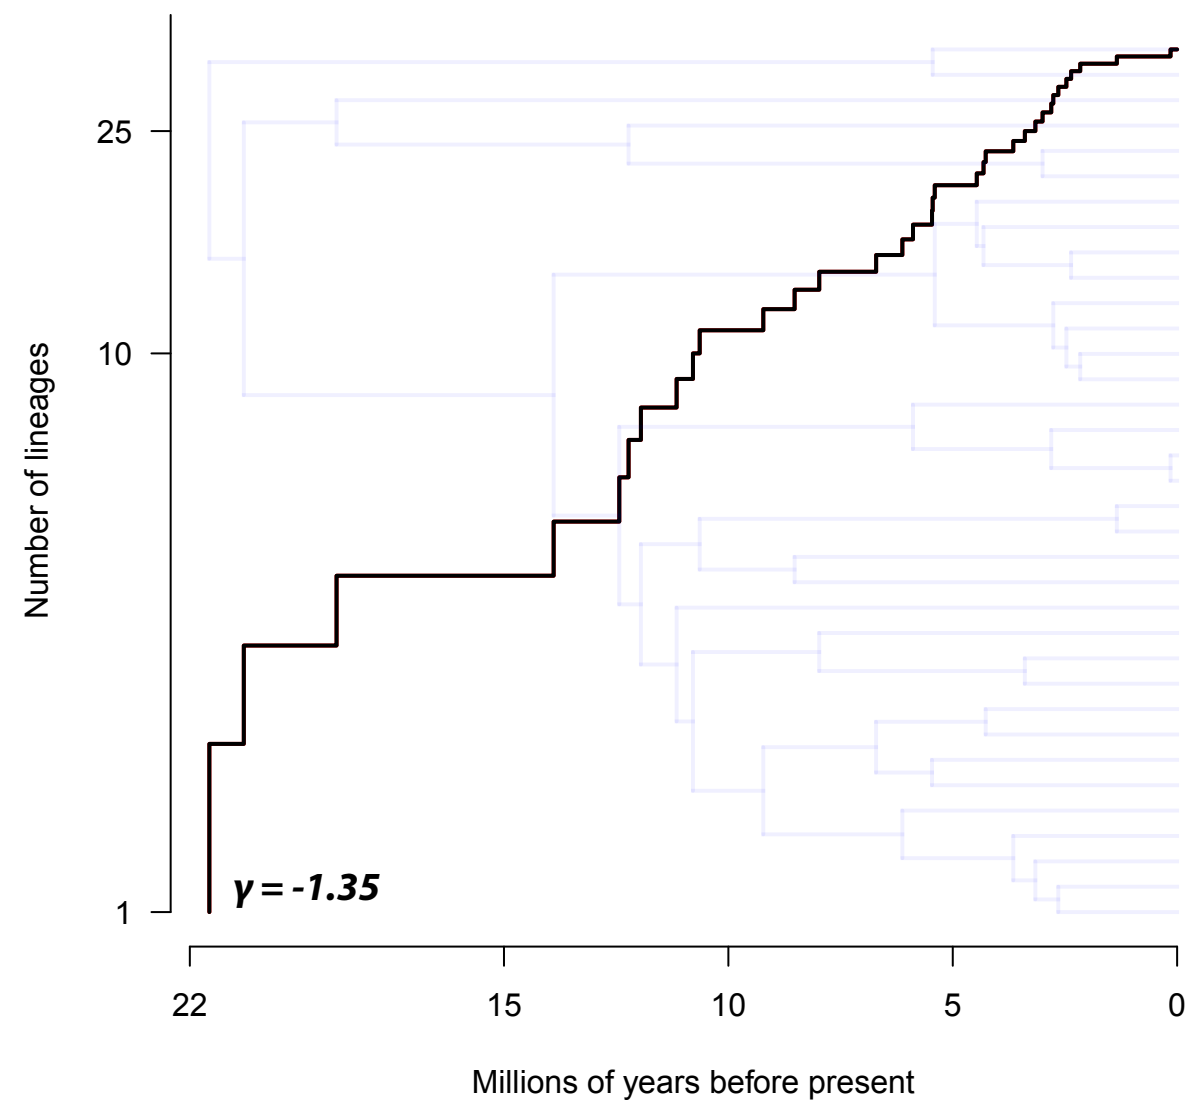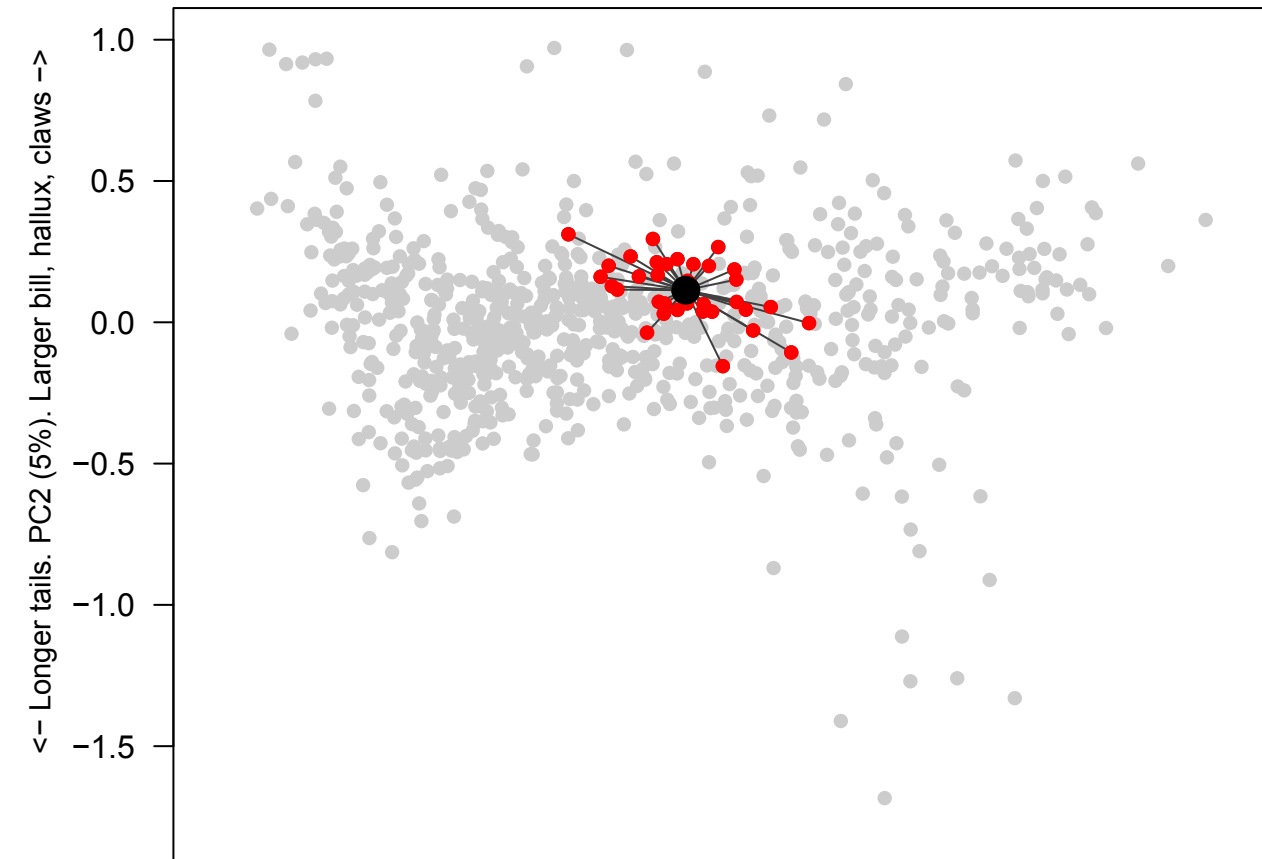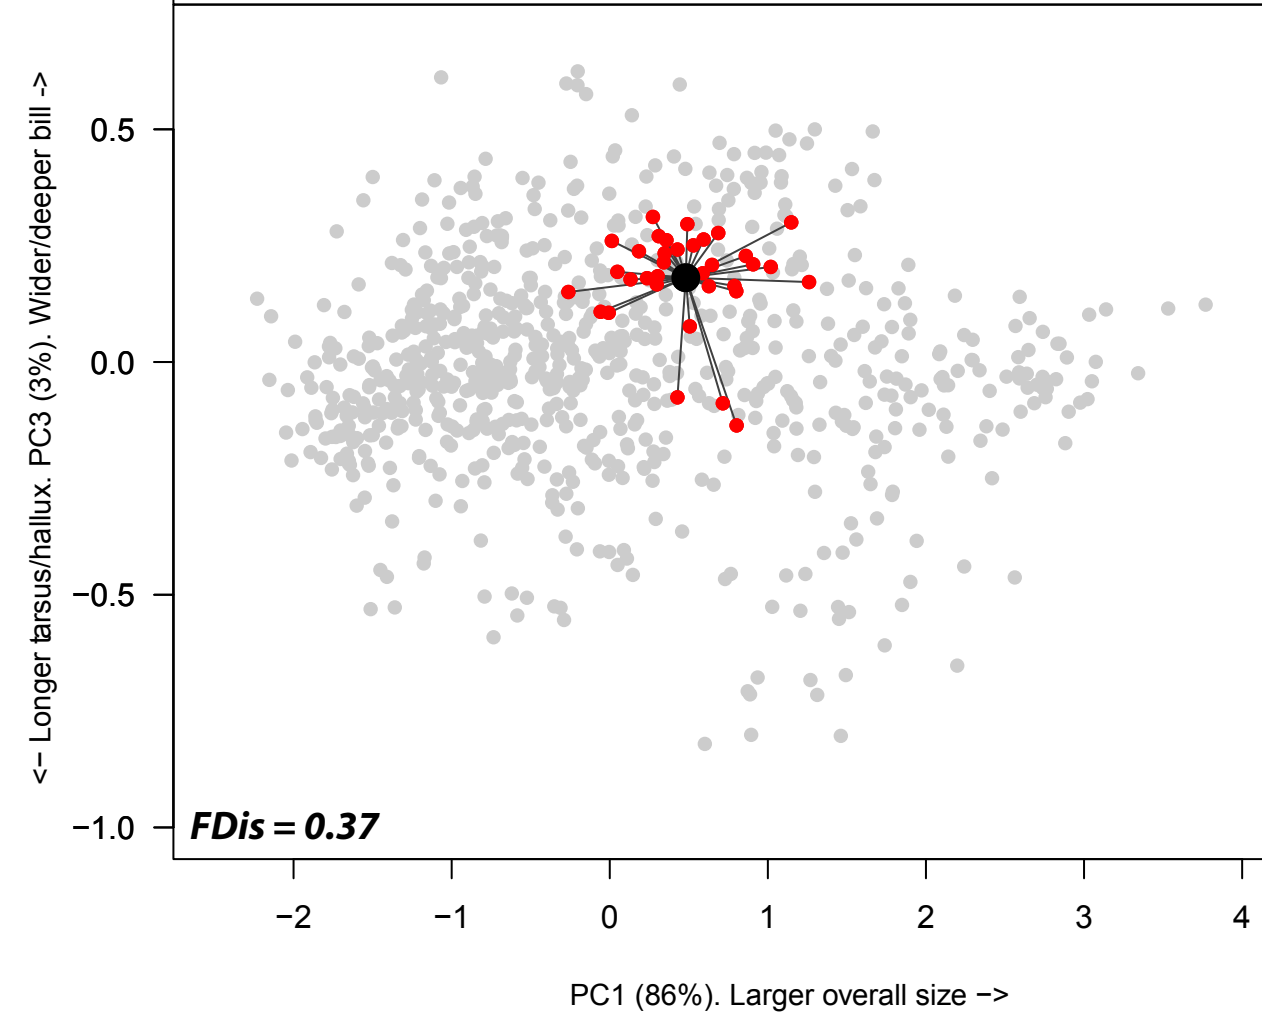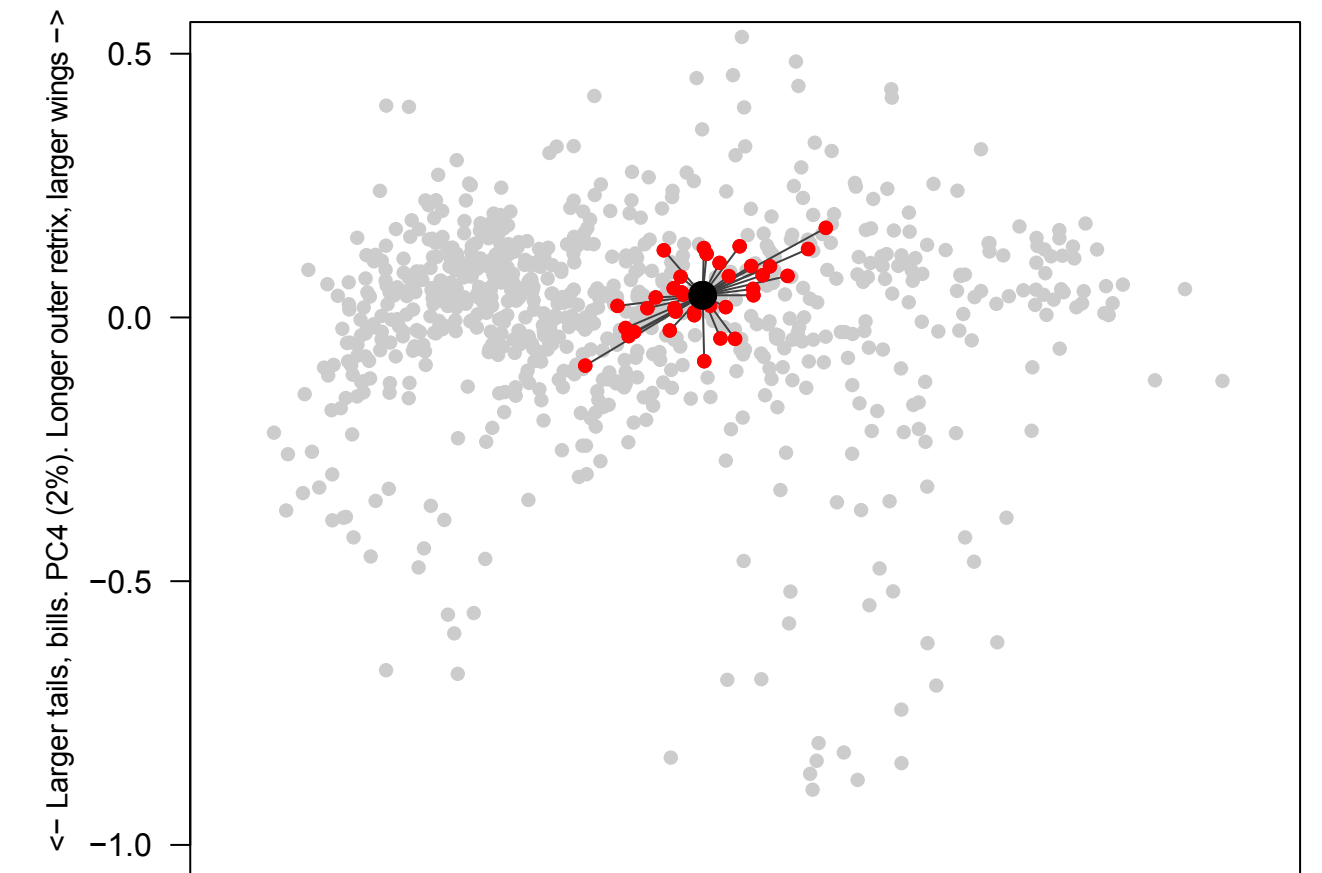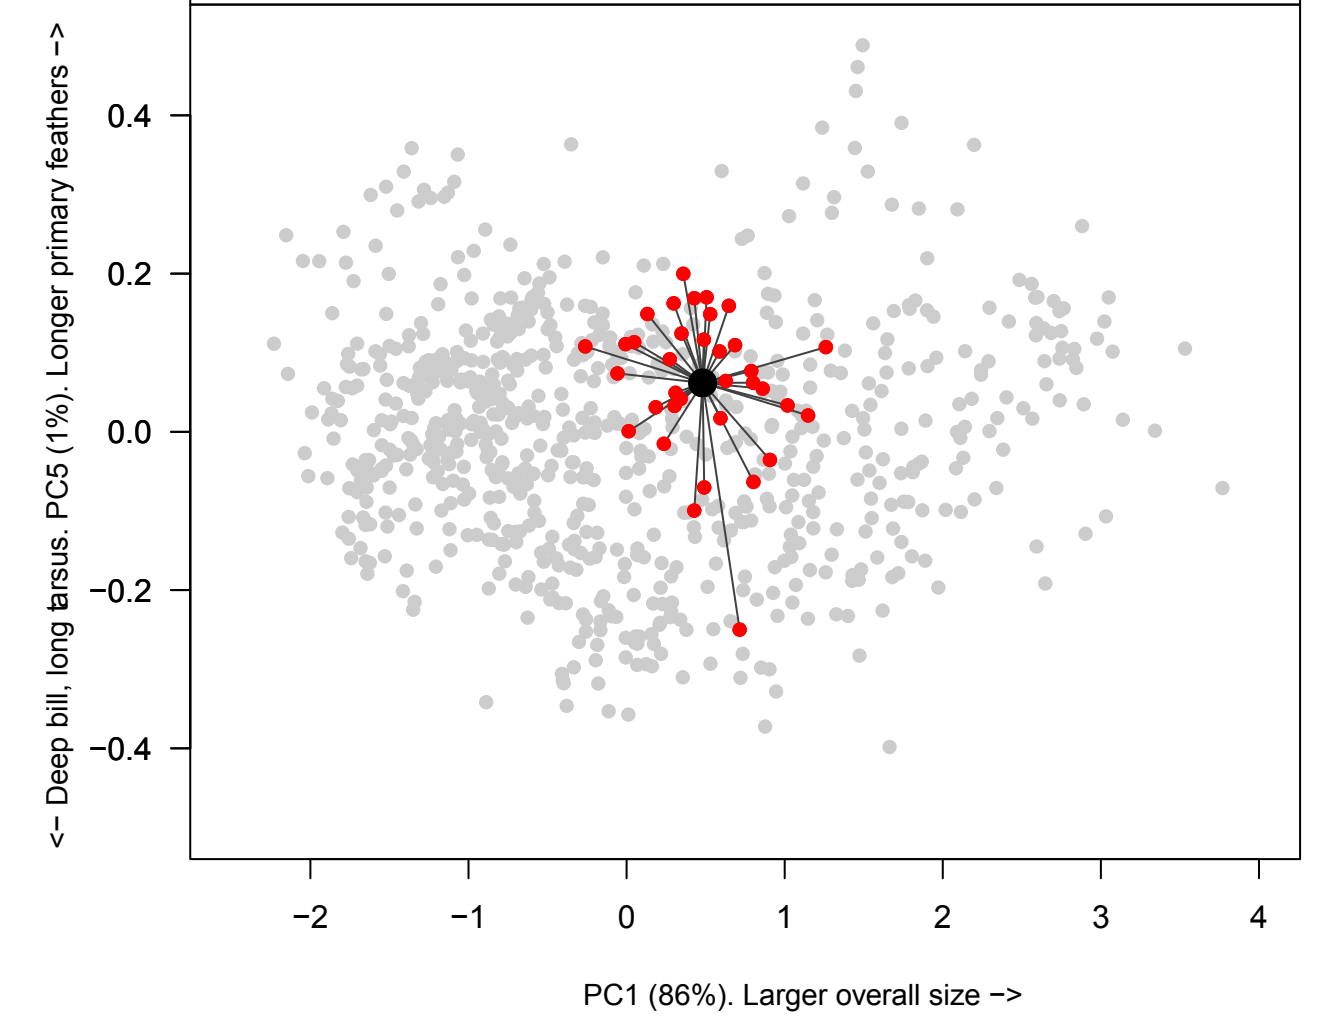

Supplement: rspb20182181supp16.pdf [file rspb20182181supp16.pdf]

# j) Pachycephalidae - 51 species

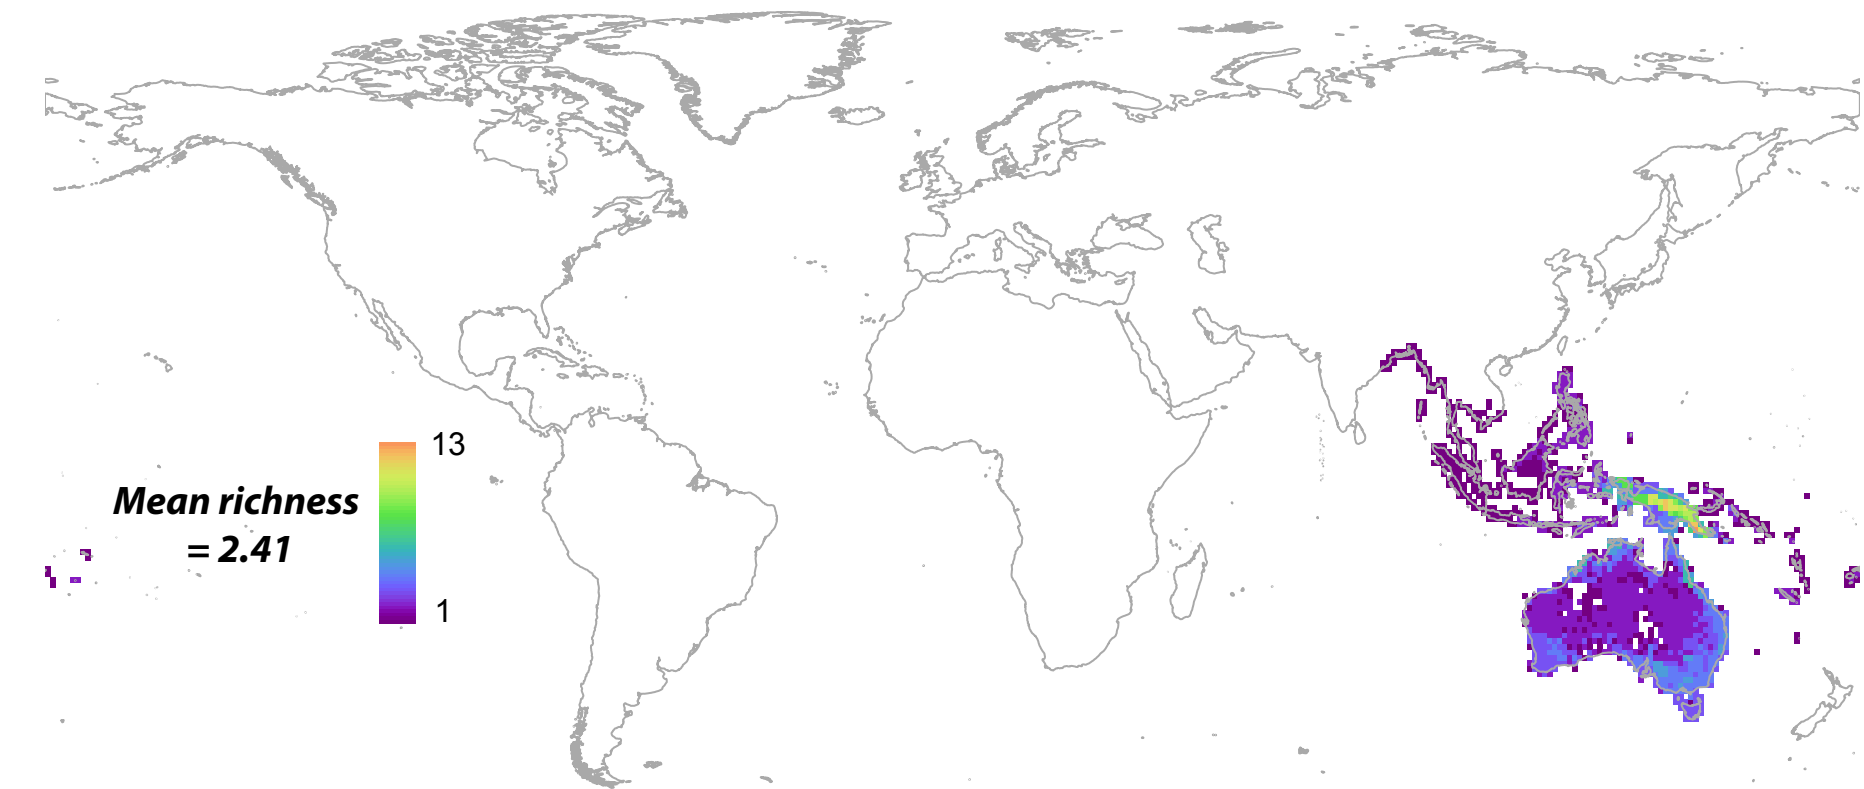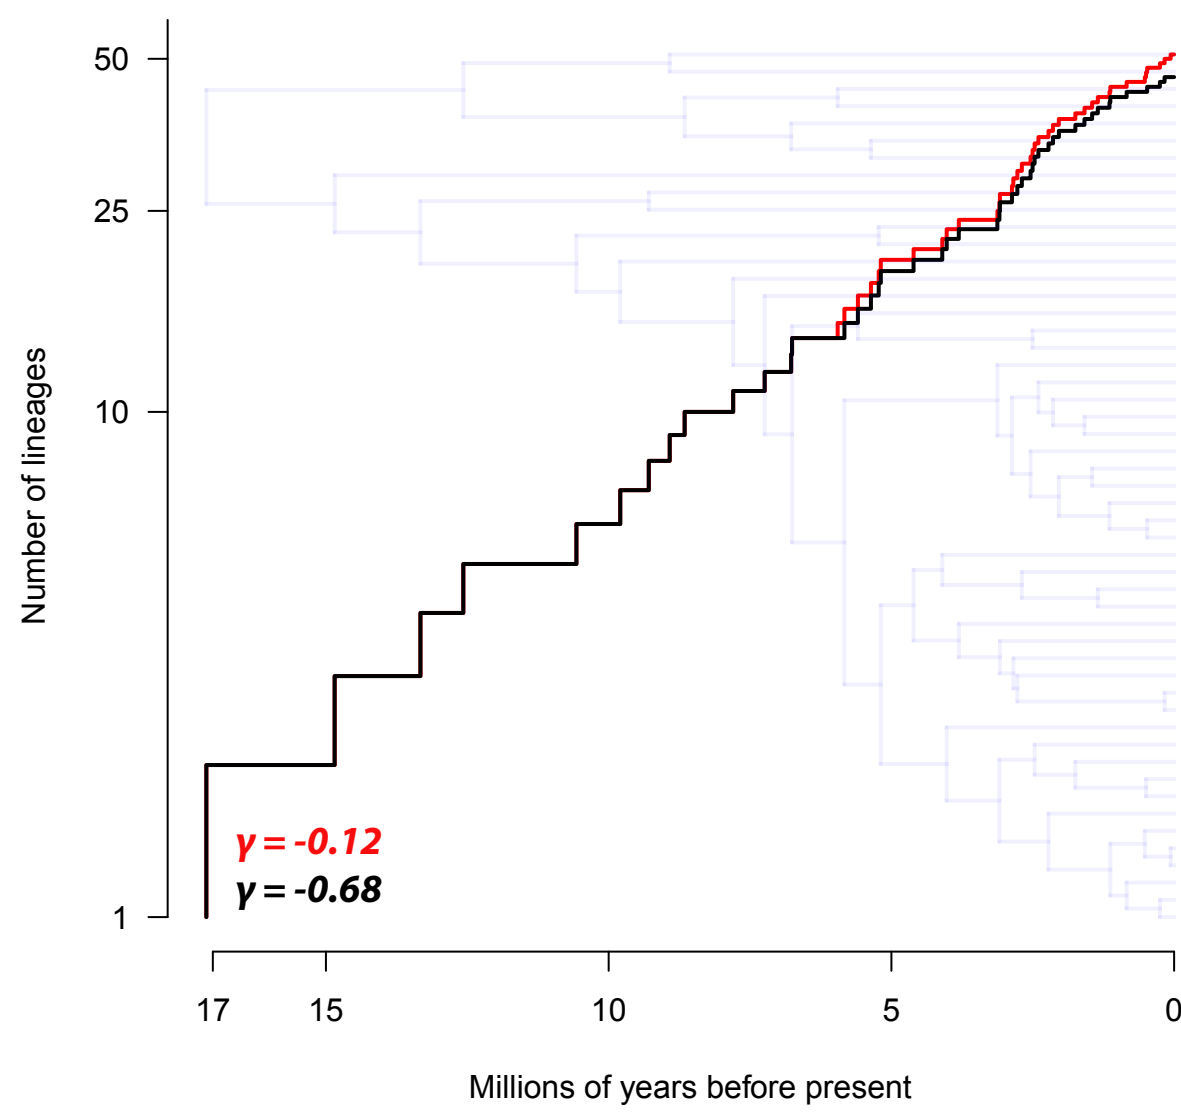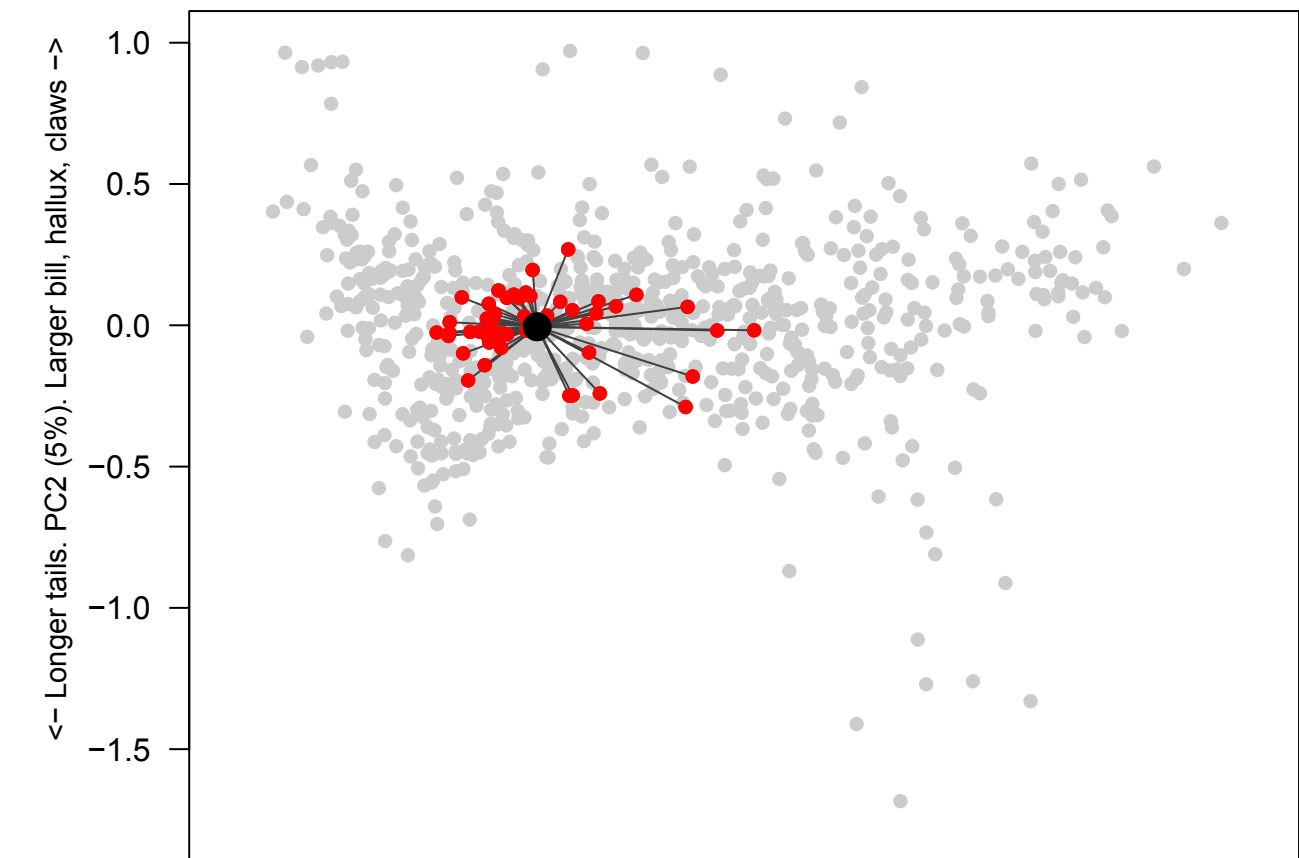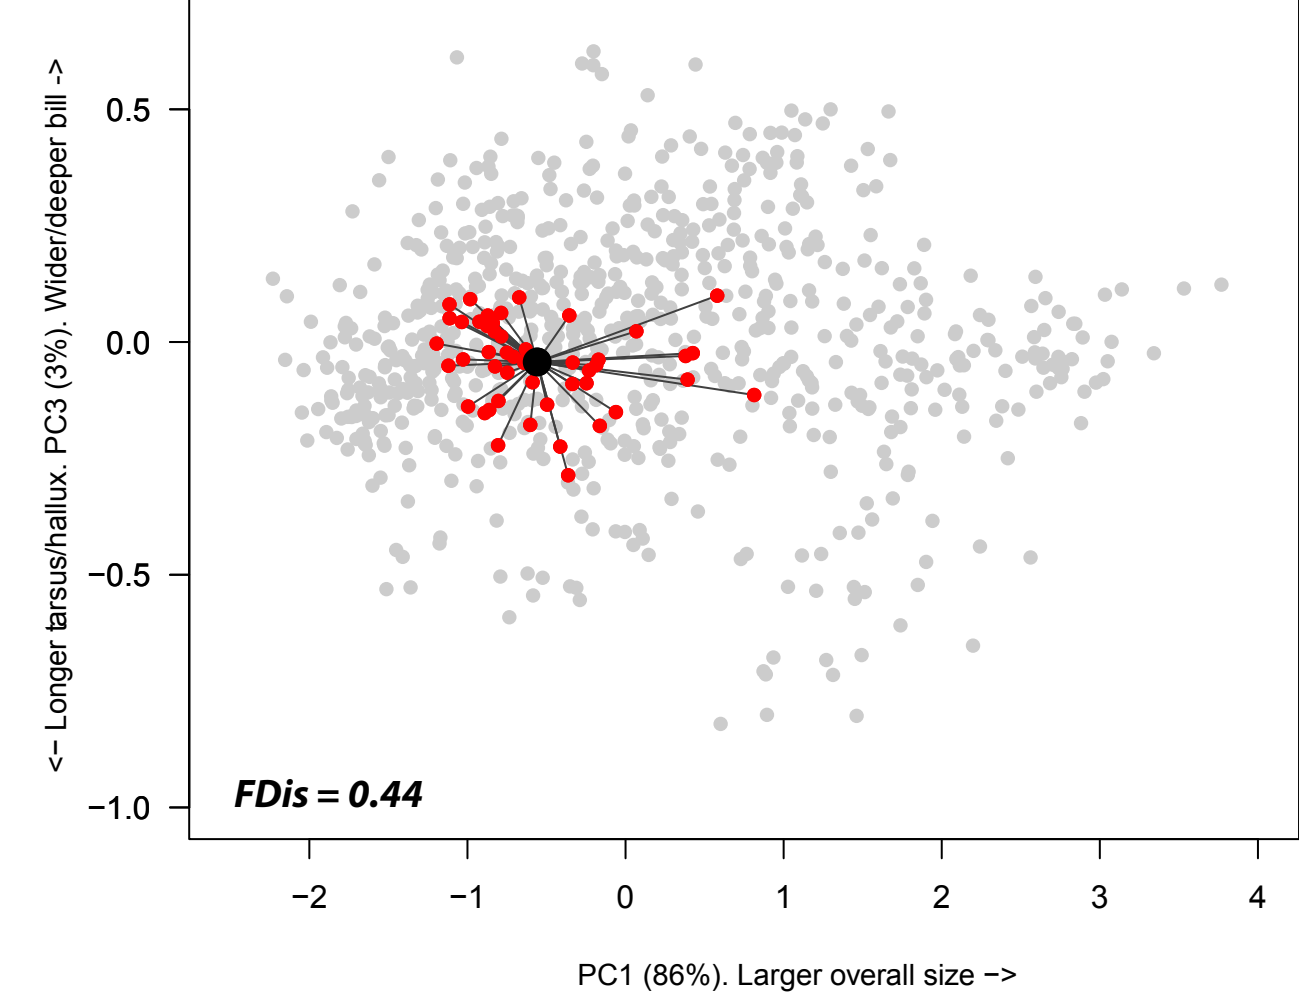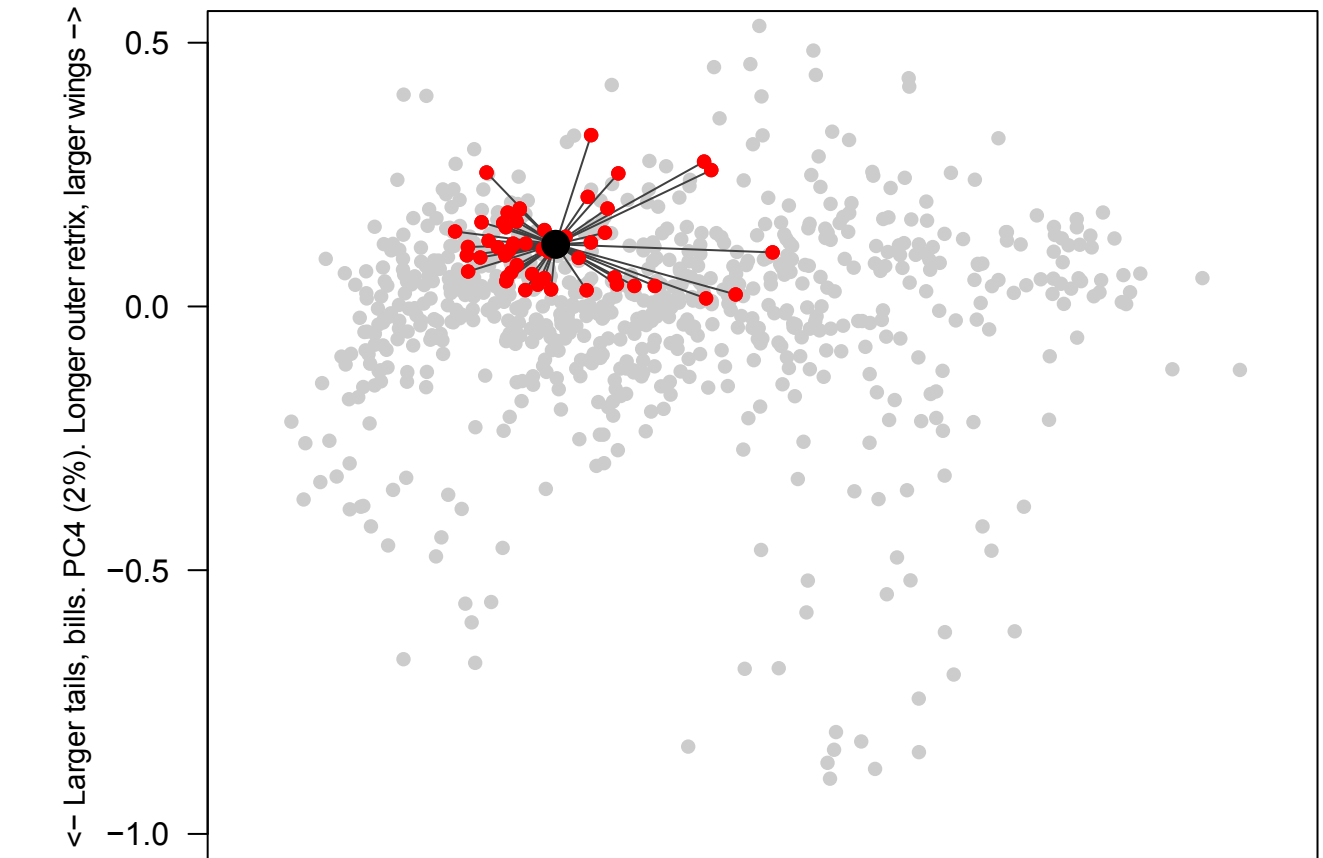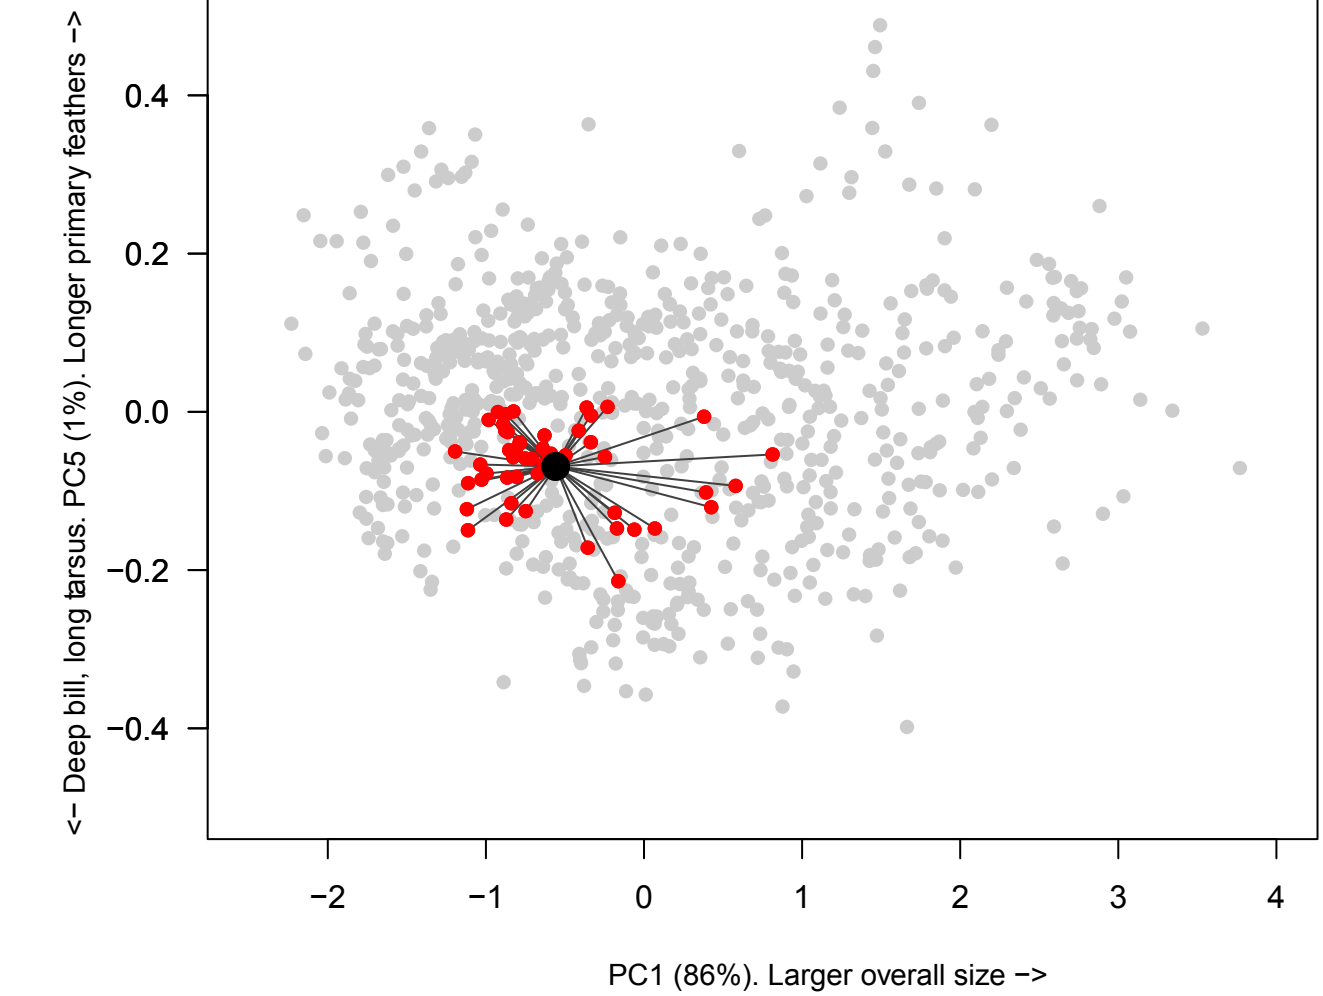

Supplement: rspb20182181supp17.pdf [file rspb20182181supp17.pdf]

# k) Paradisaeidae - 41 species

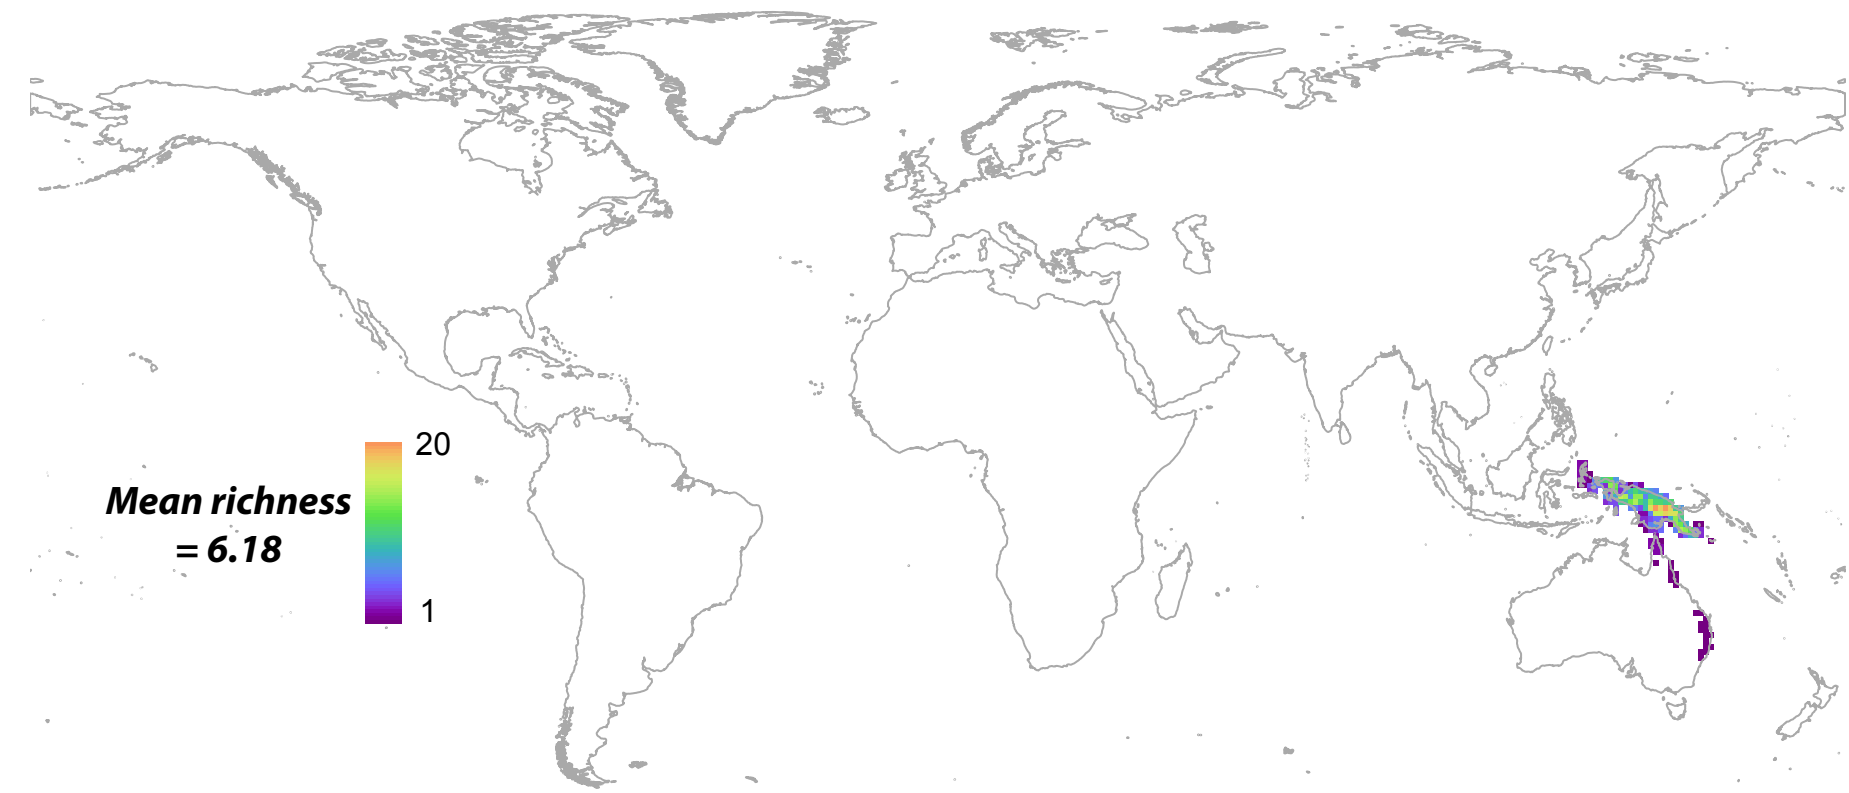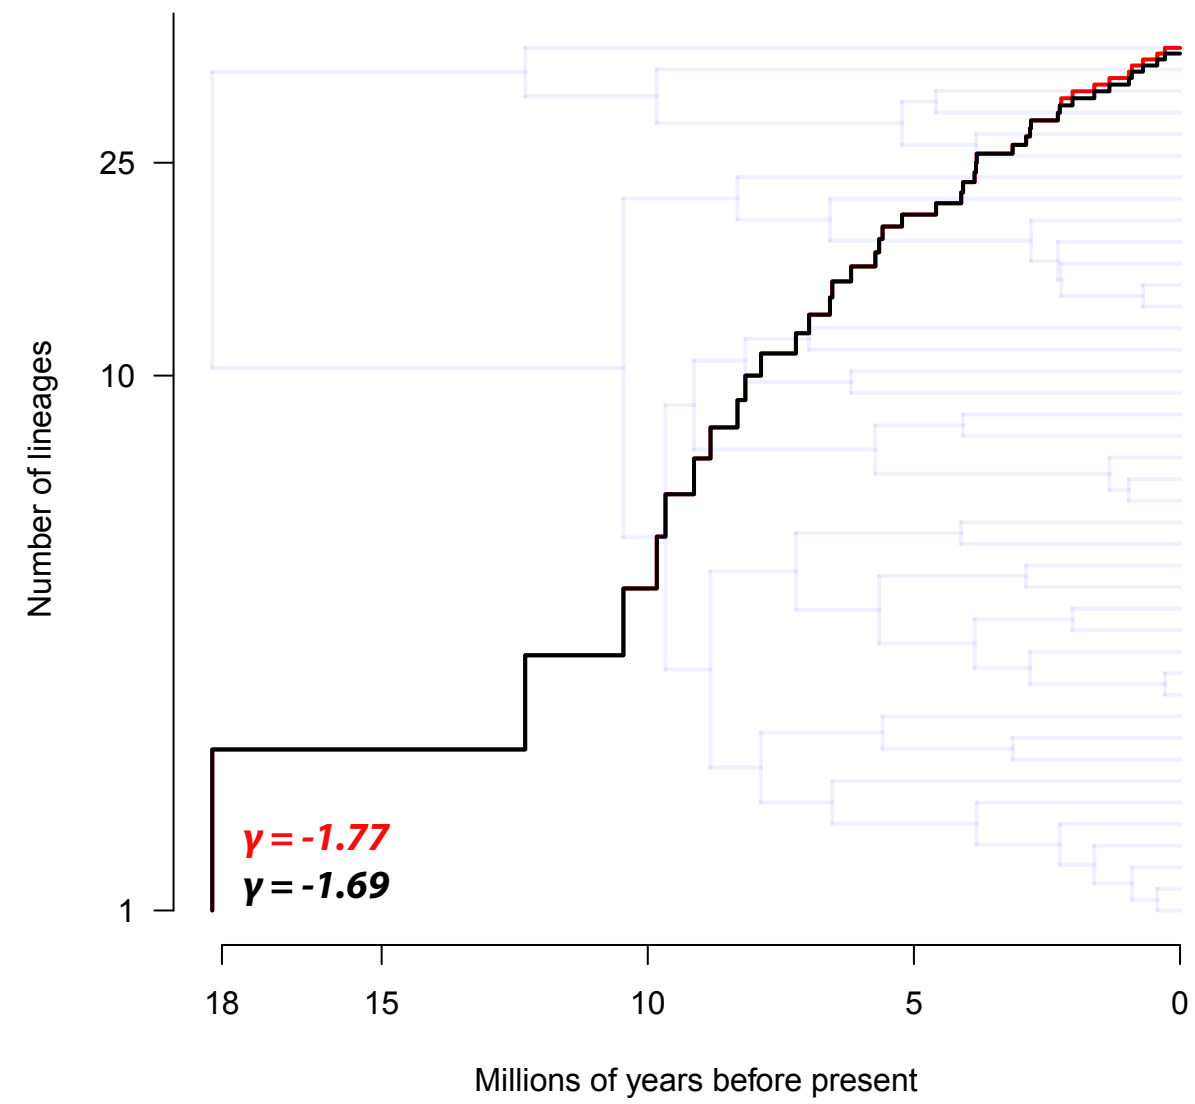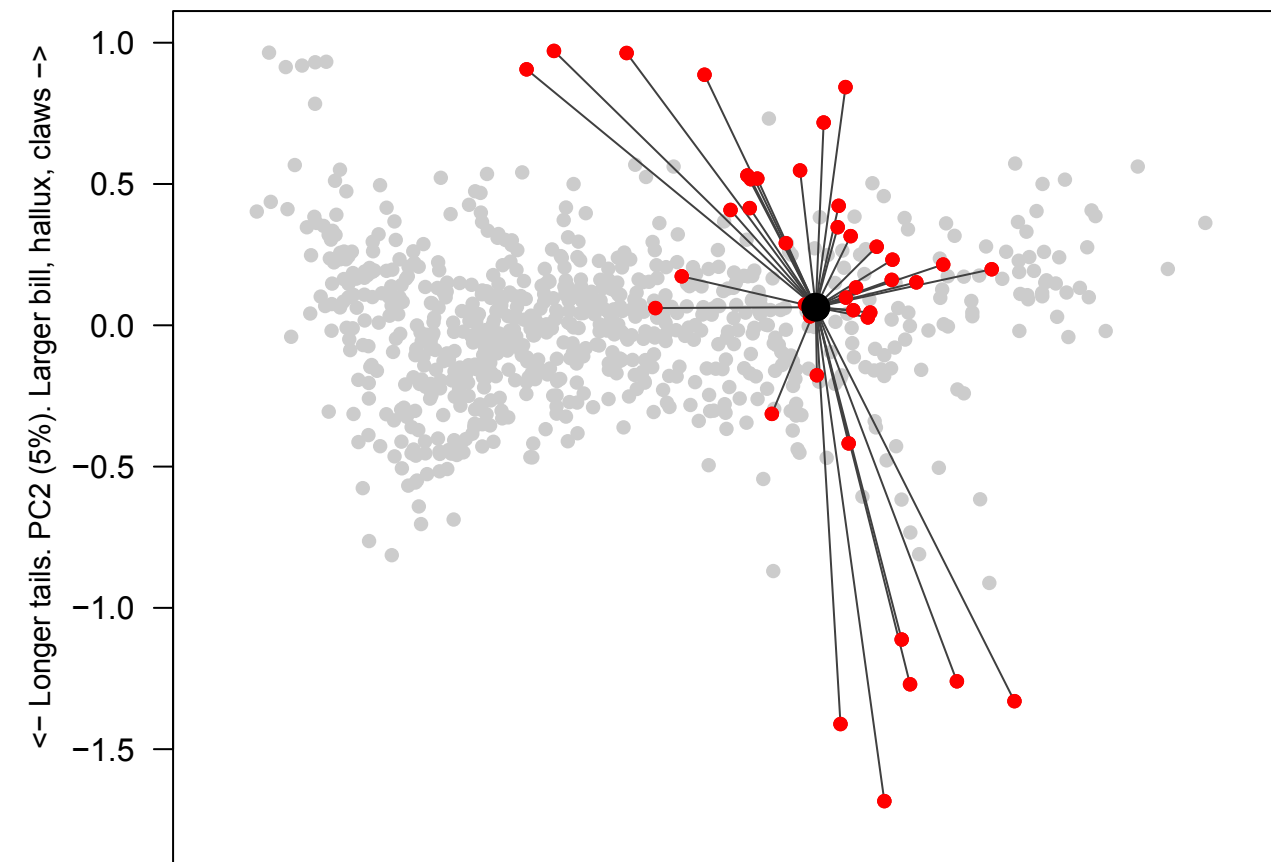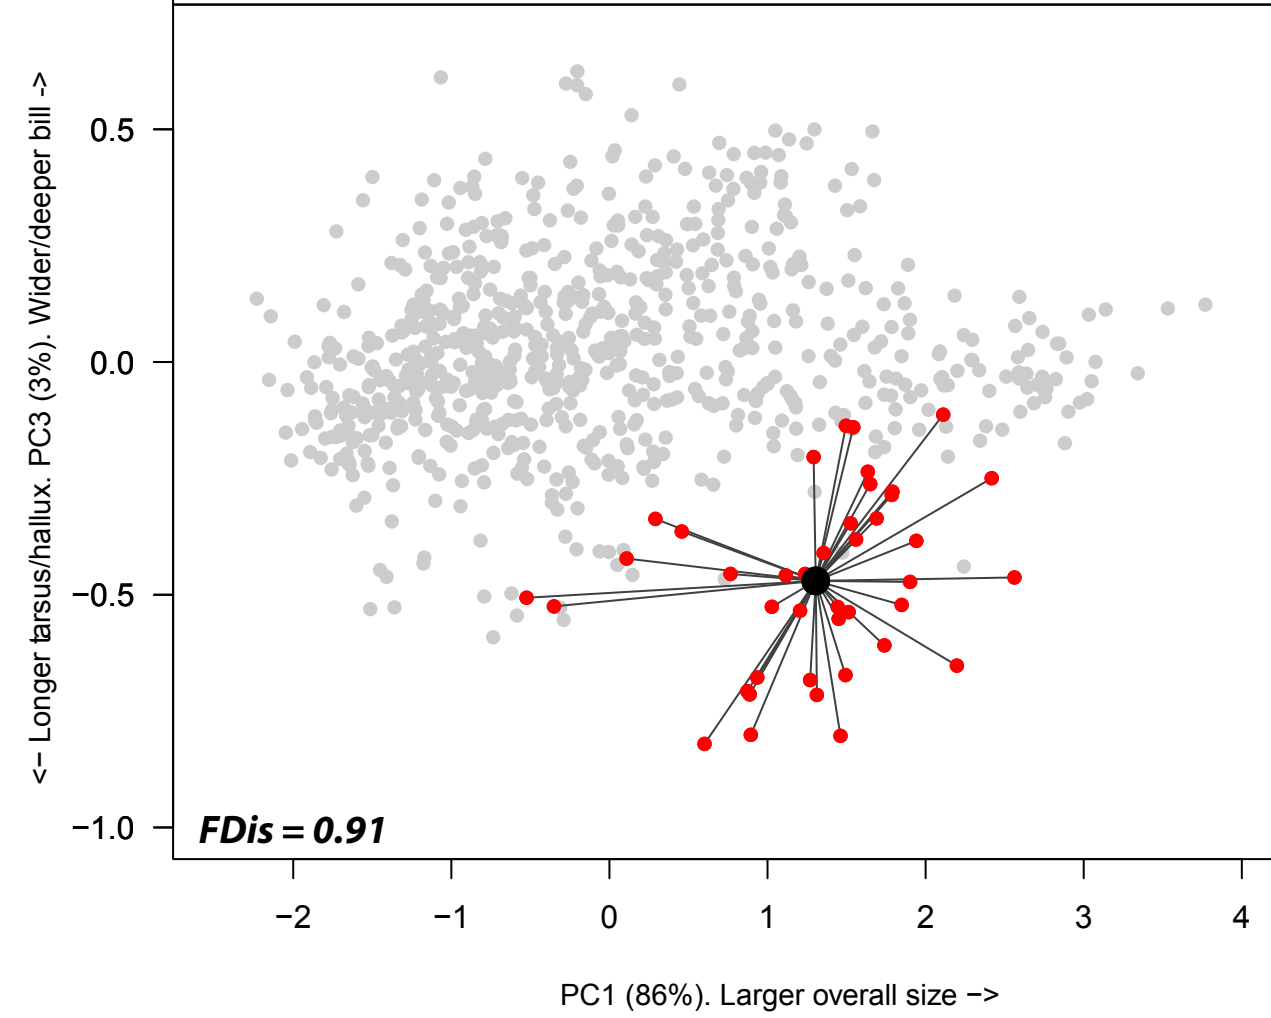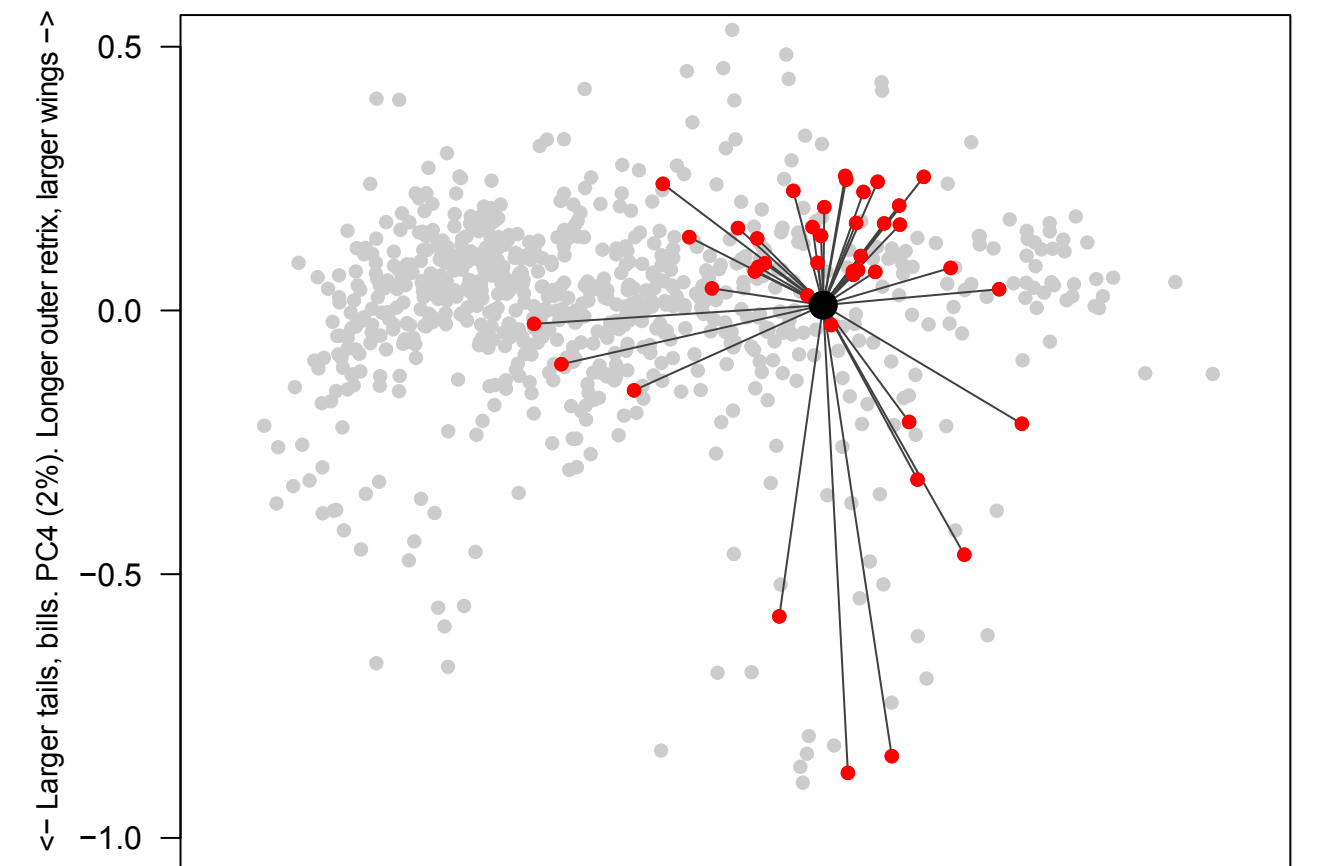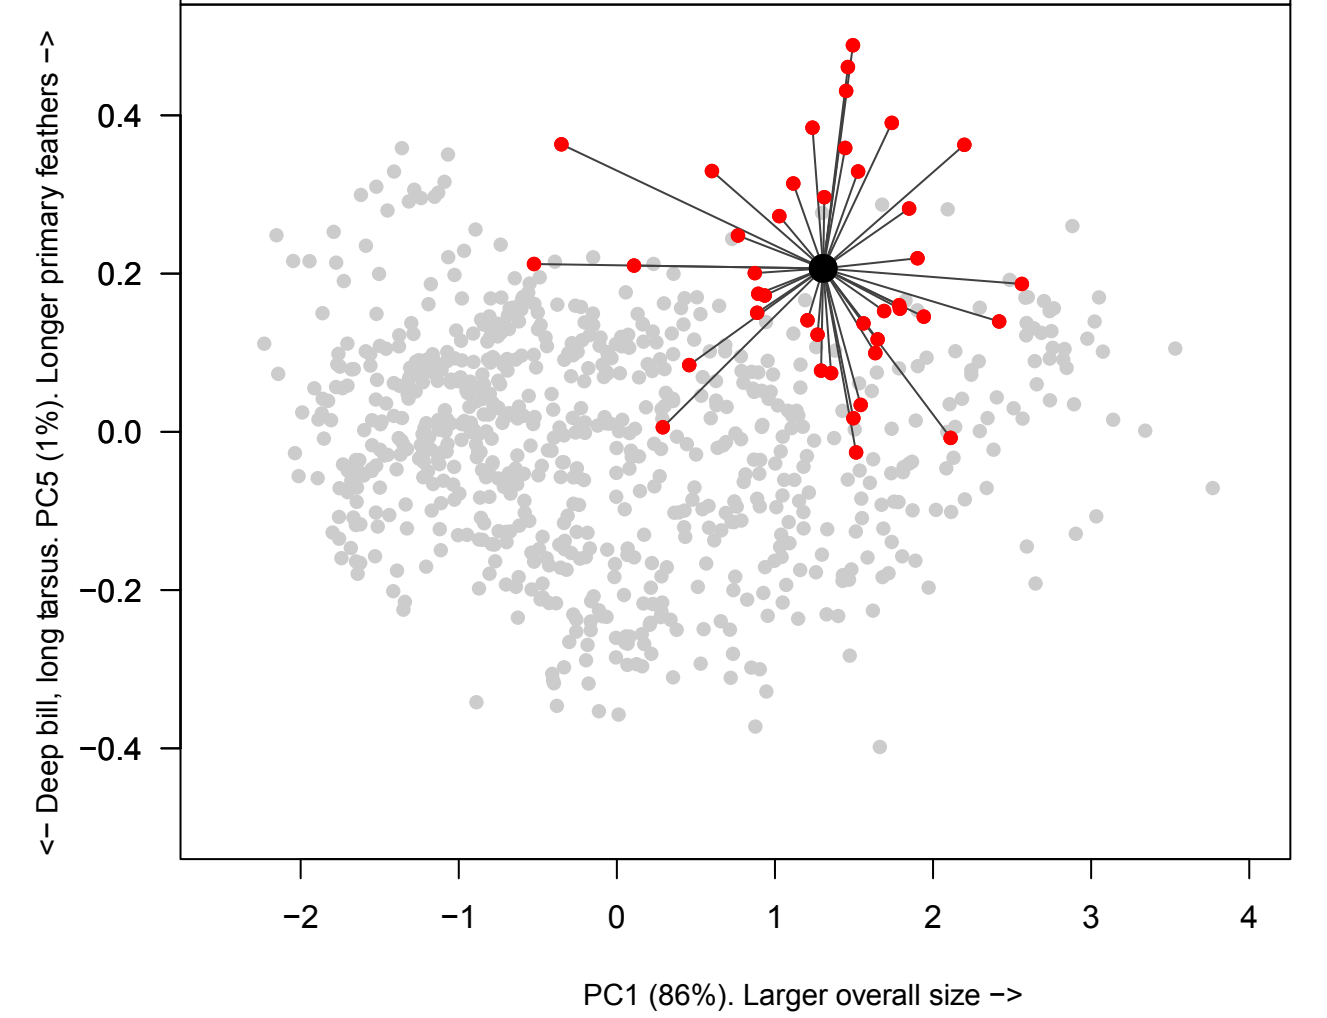

Supplement: rspb20182181supp18.pdf [file rspb20182181supp18.pdf]

# I) Platysyeridae - 30 species

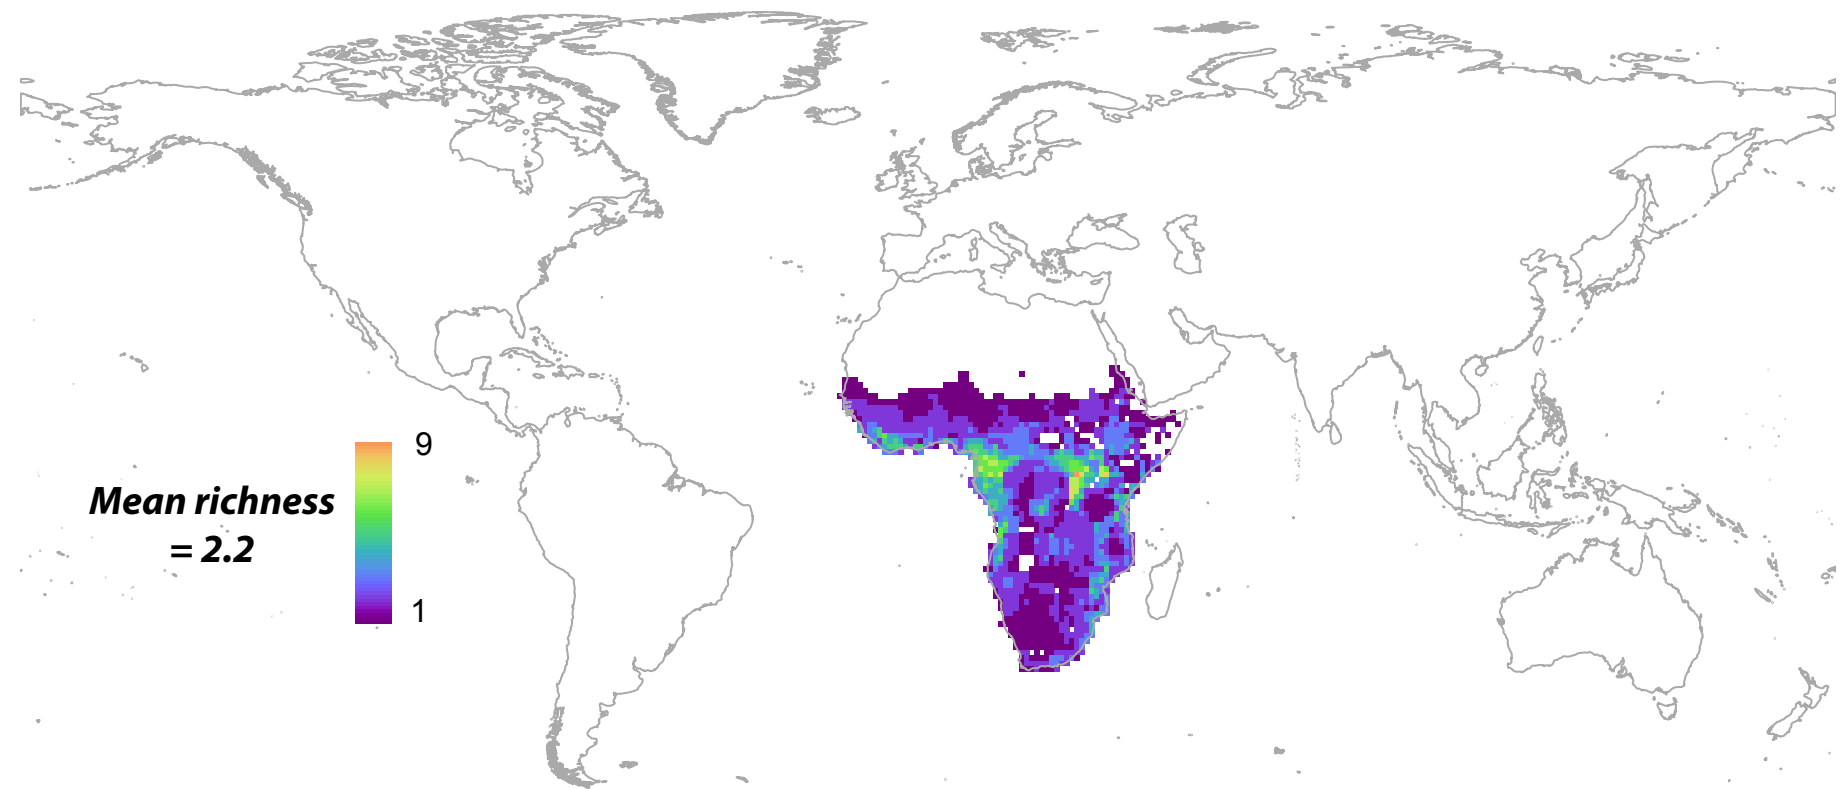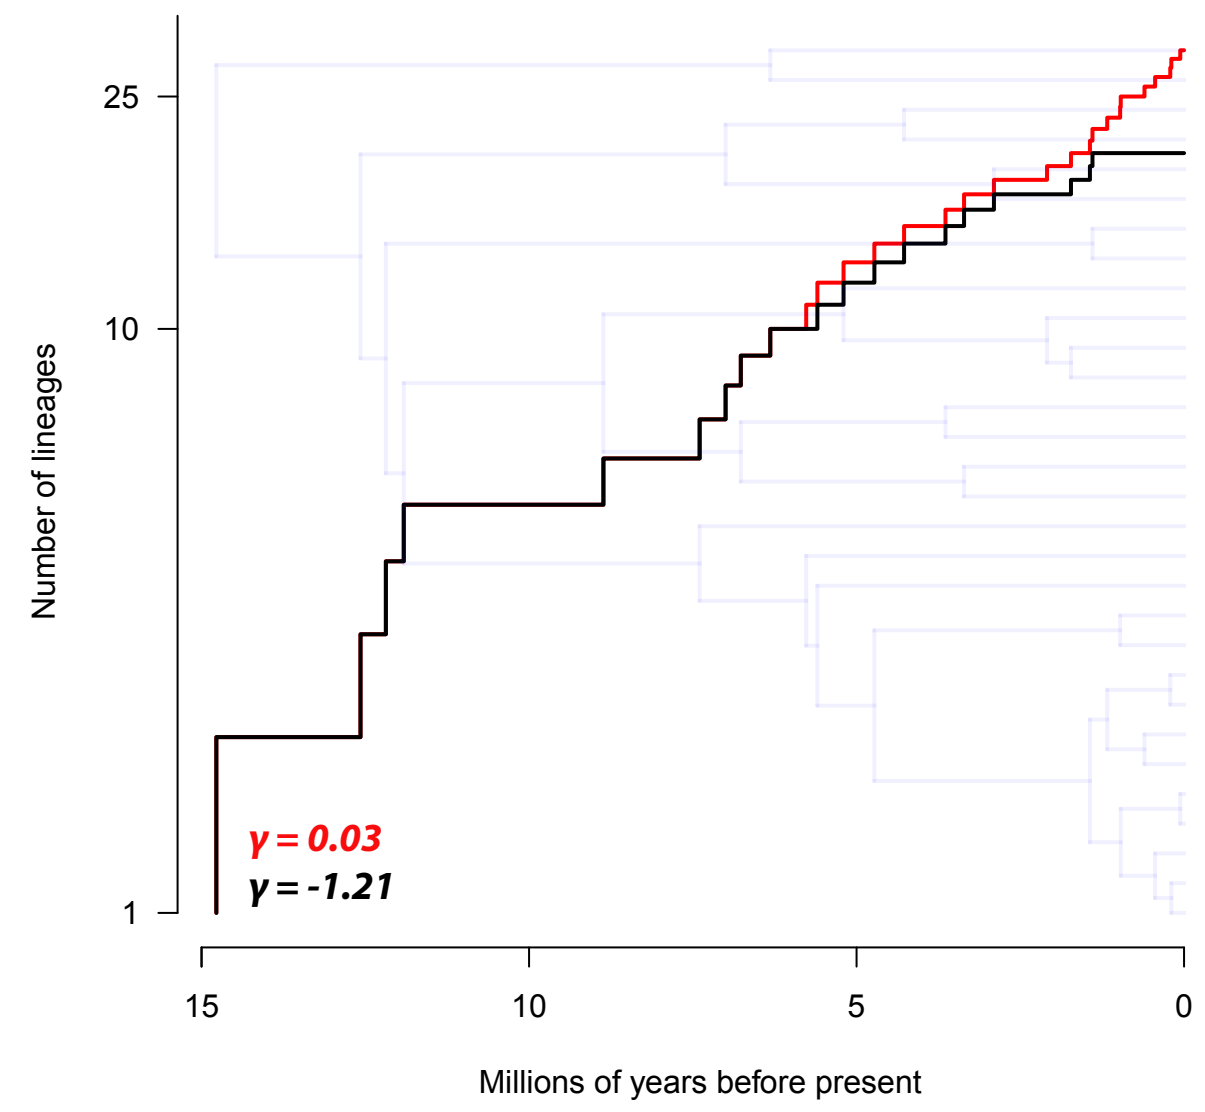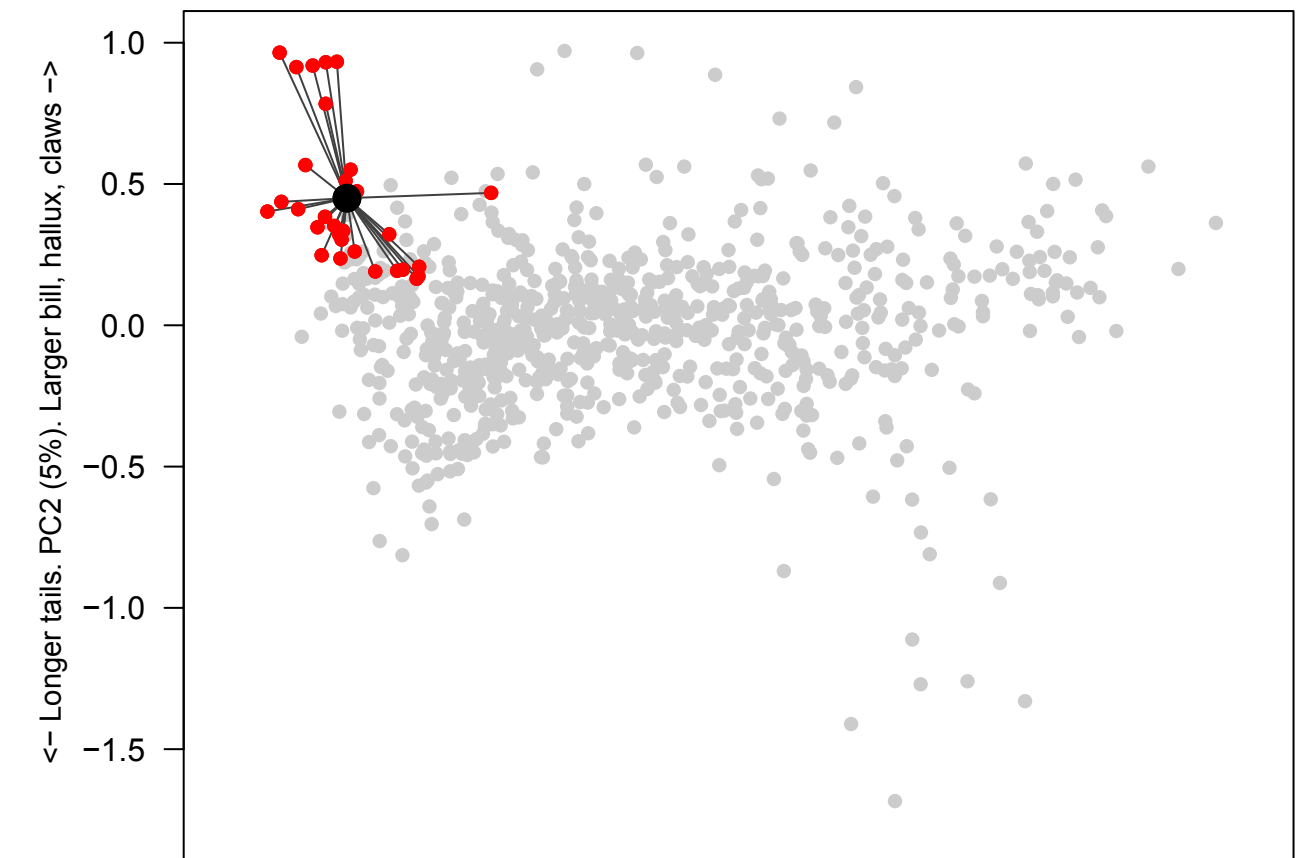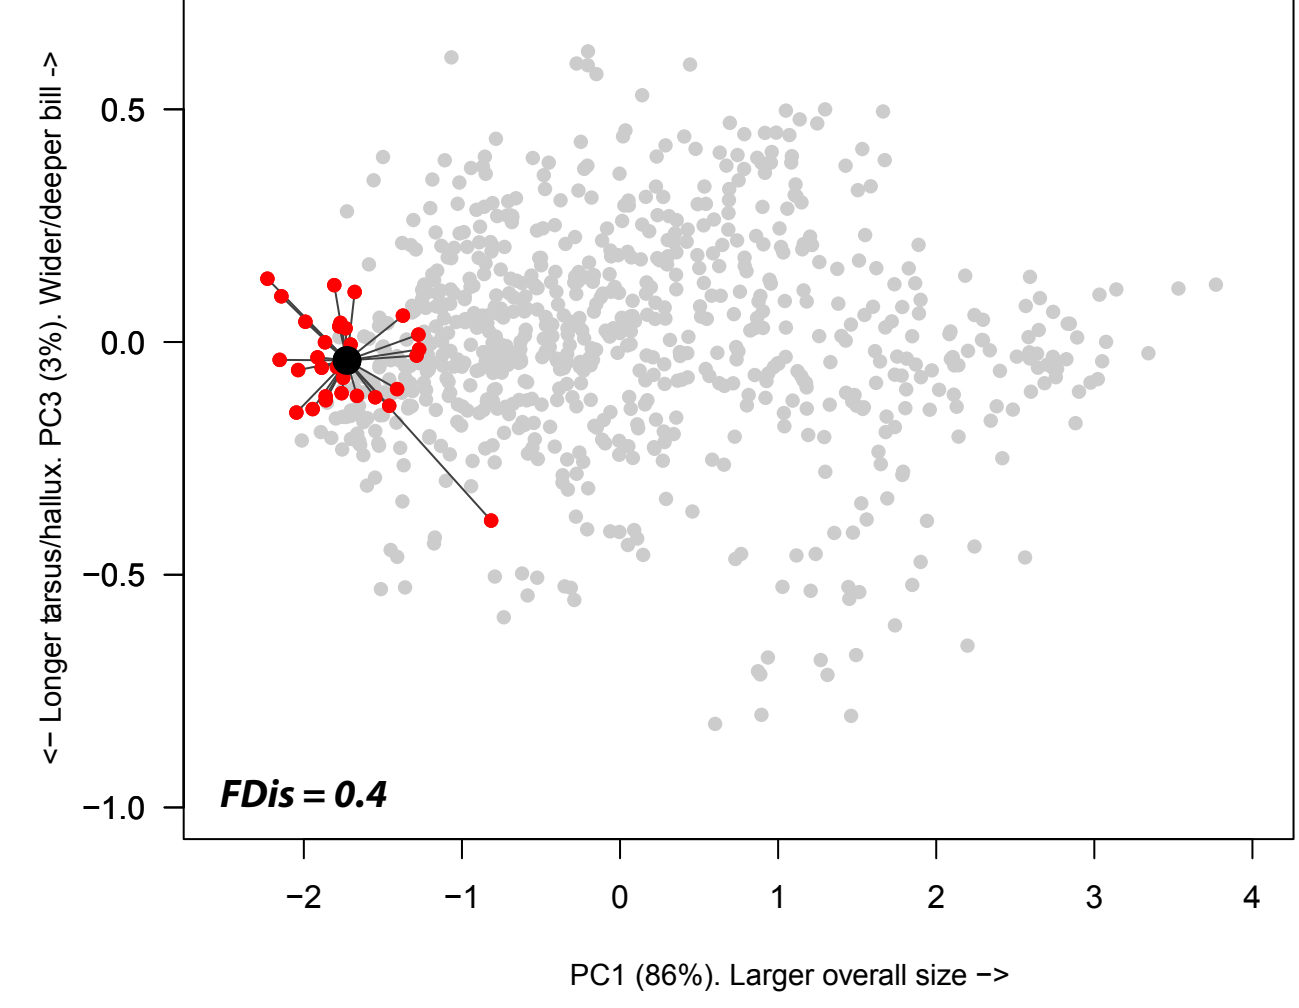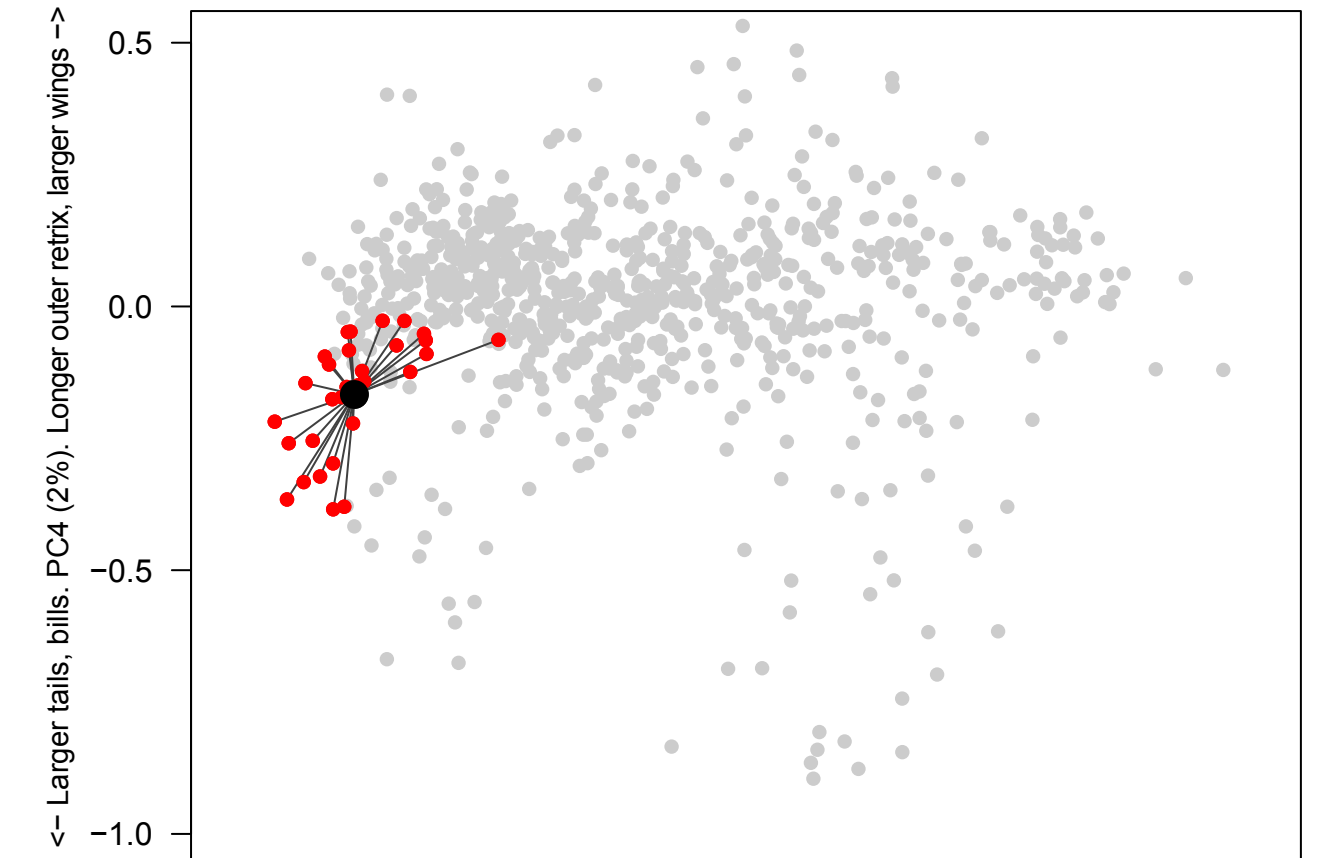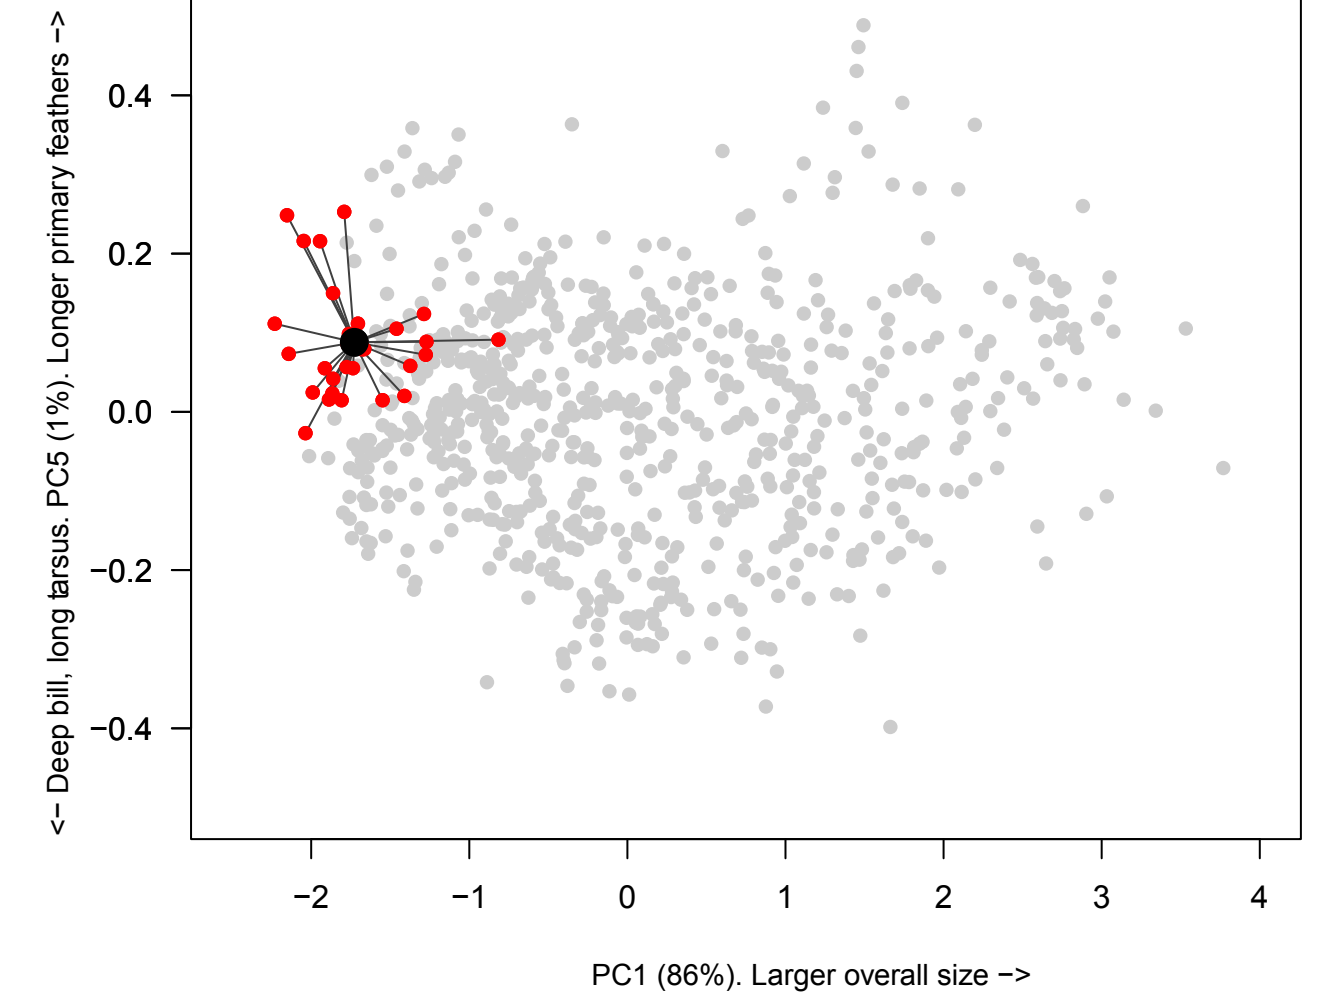

Supplement: rspb20182181supp19.pdf [file rspb20182181supp19.pdf]

# m) Rhipiduridae - 46 species

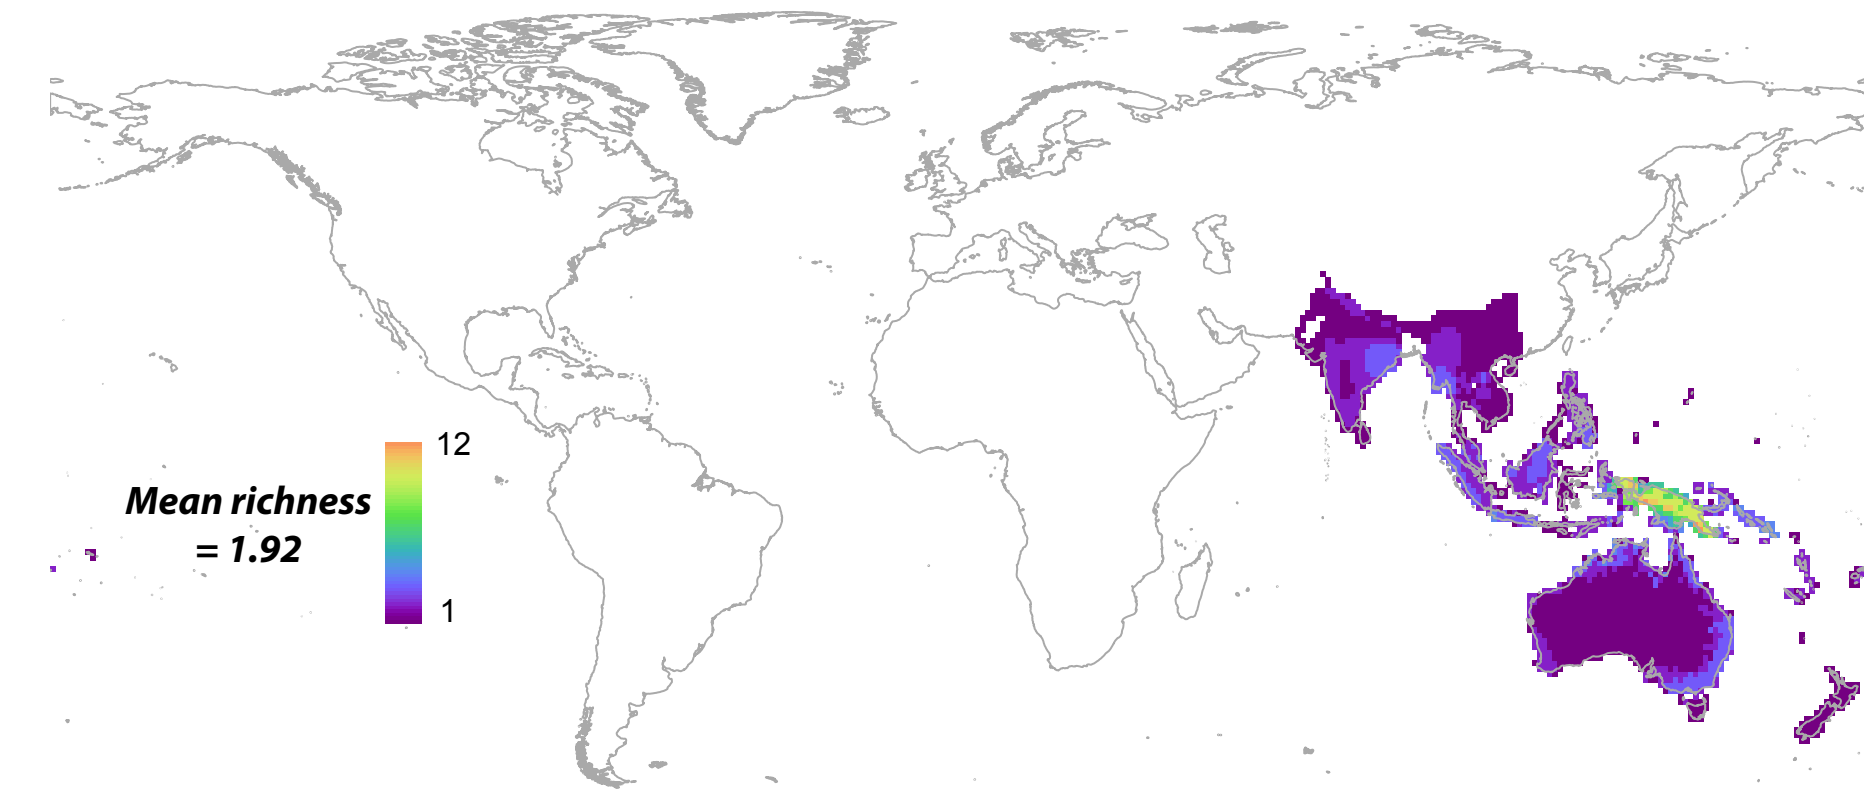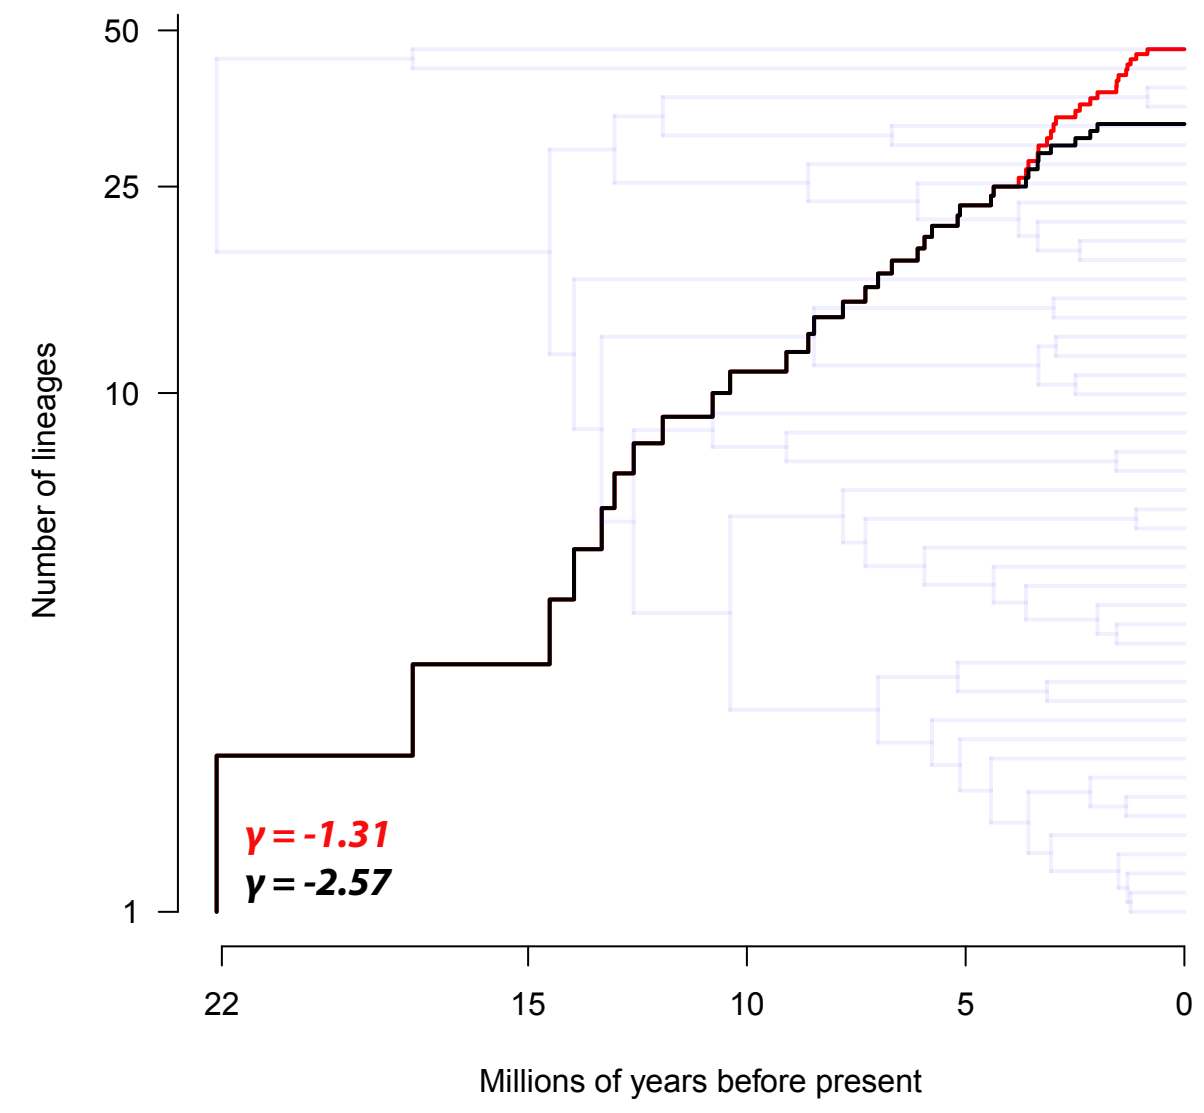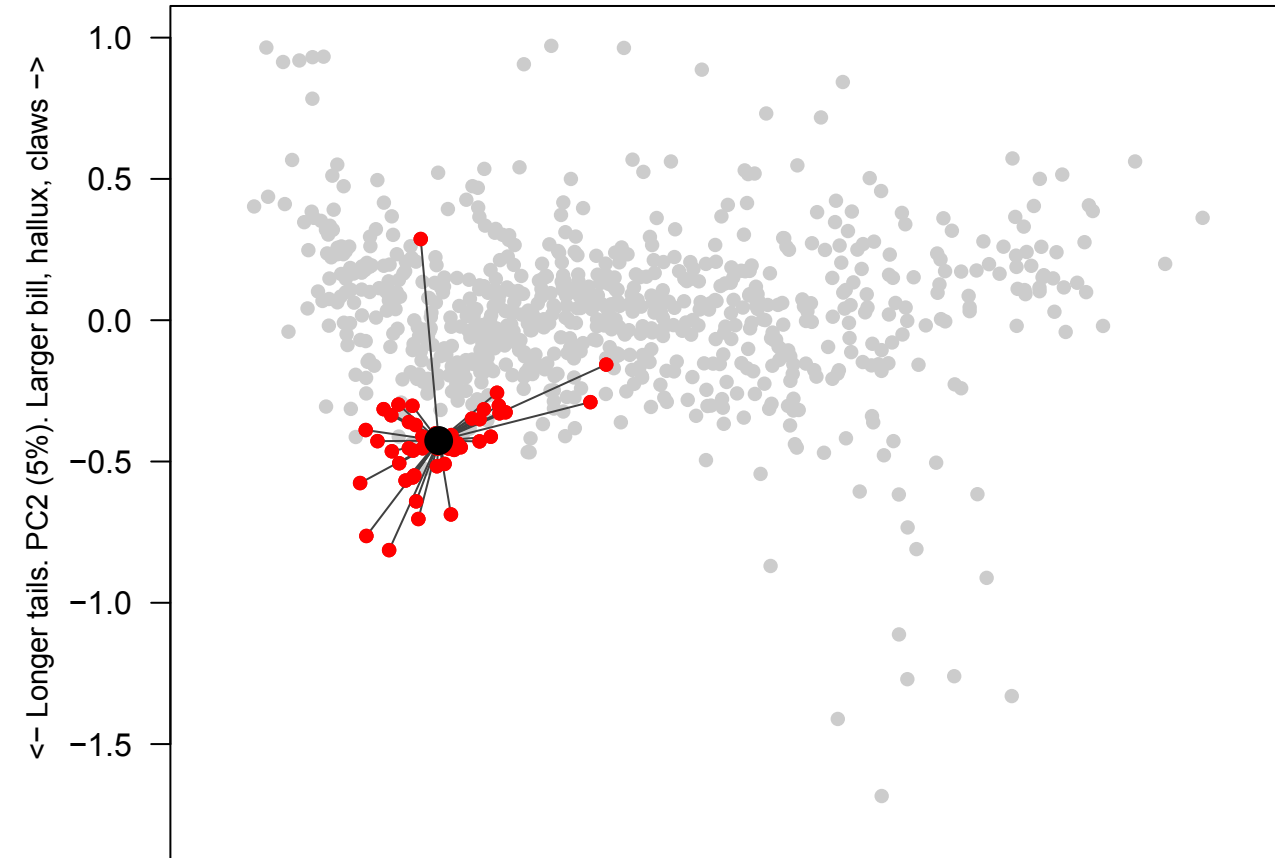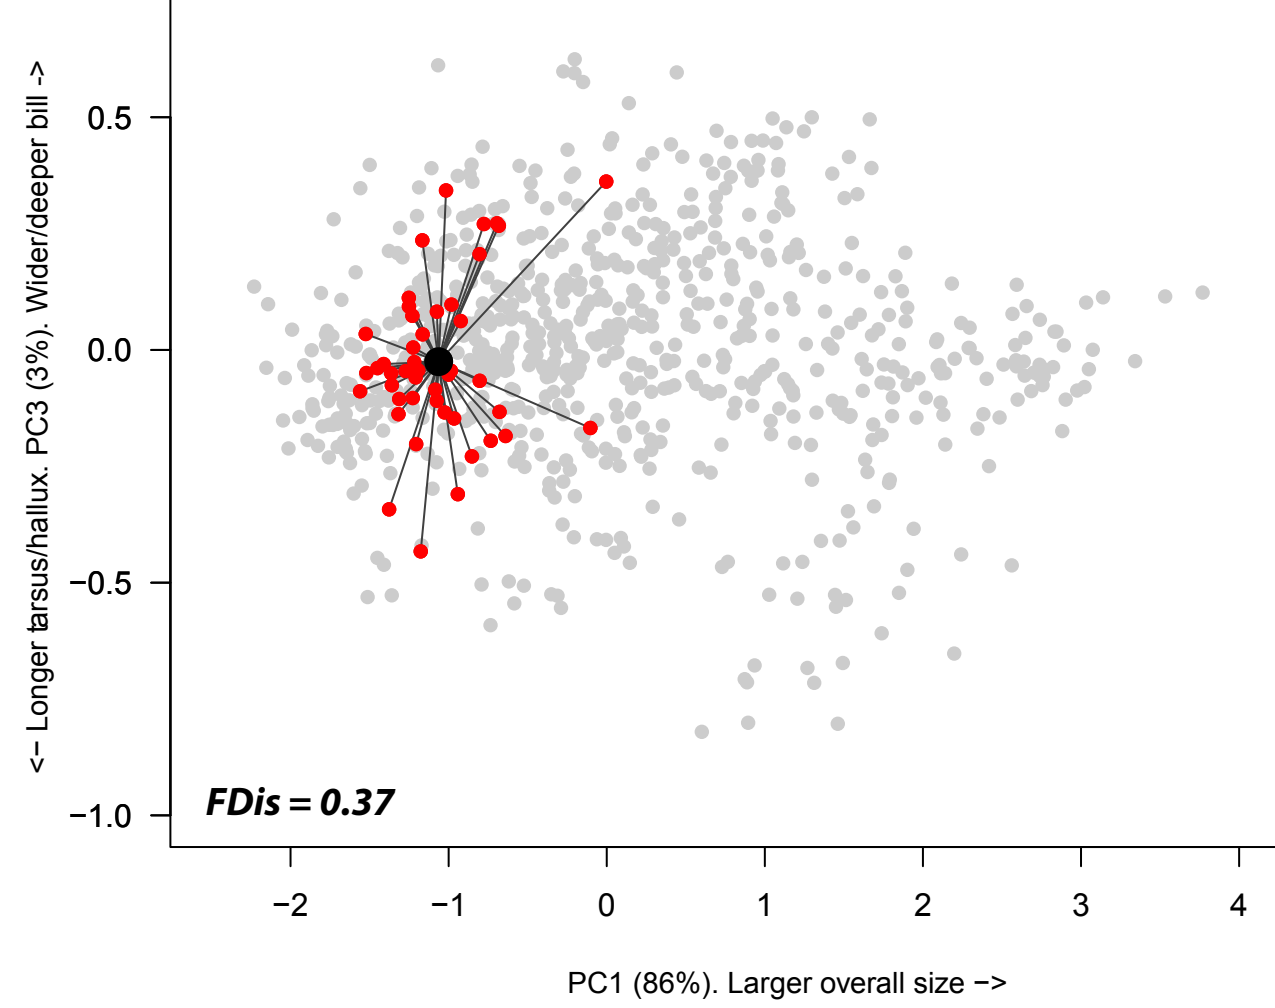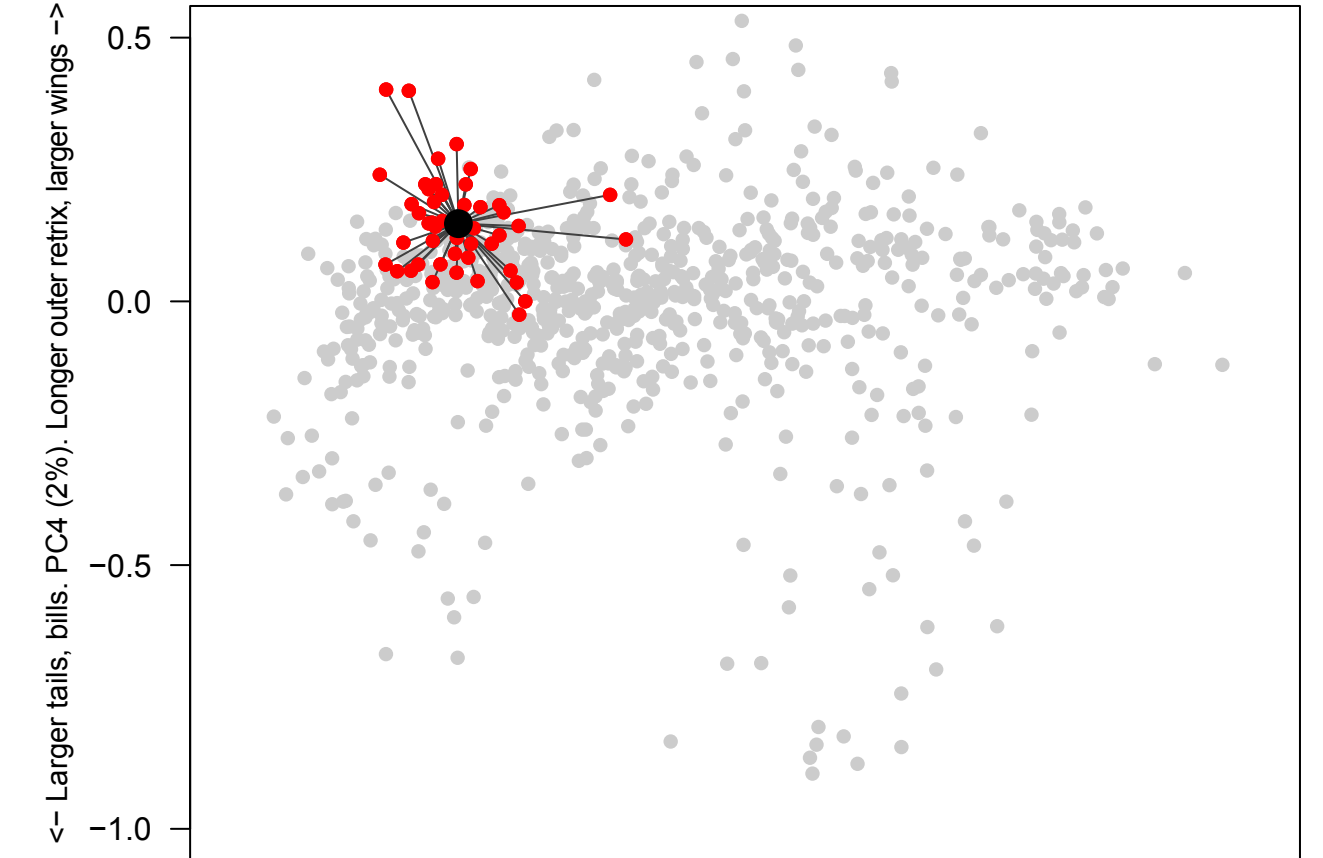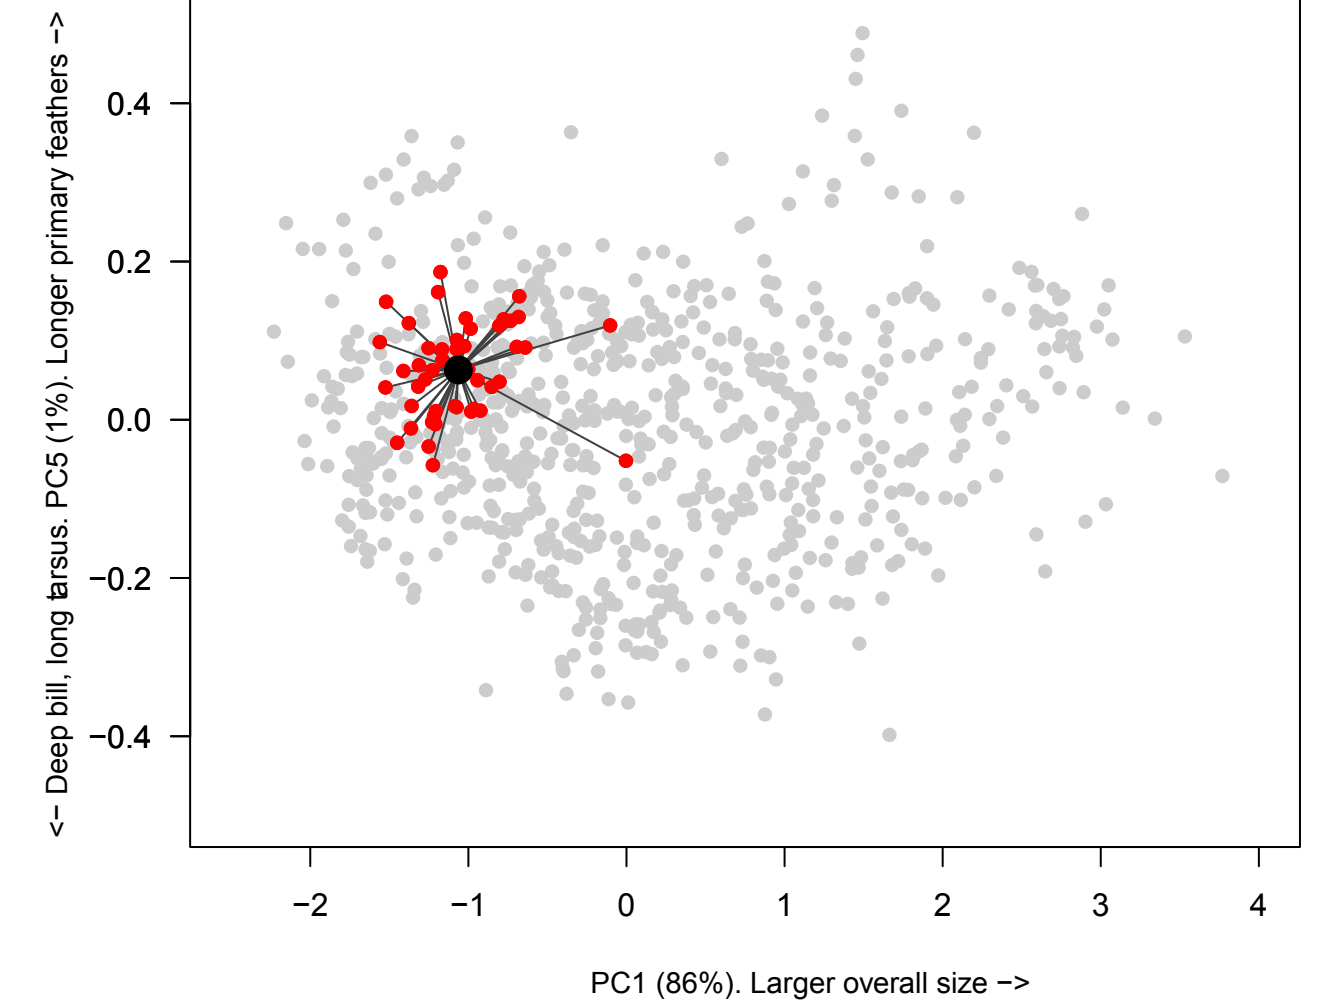

Supplement: rspb20182181supp20.pdf [file rspb20182181supp20.pdf]

n) Vangidae - 21 species

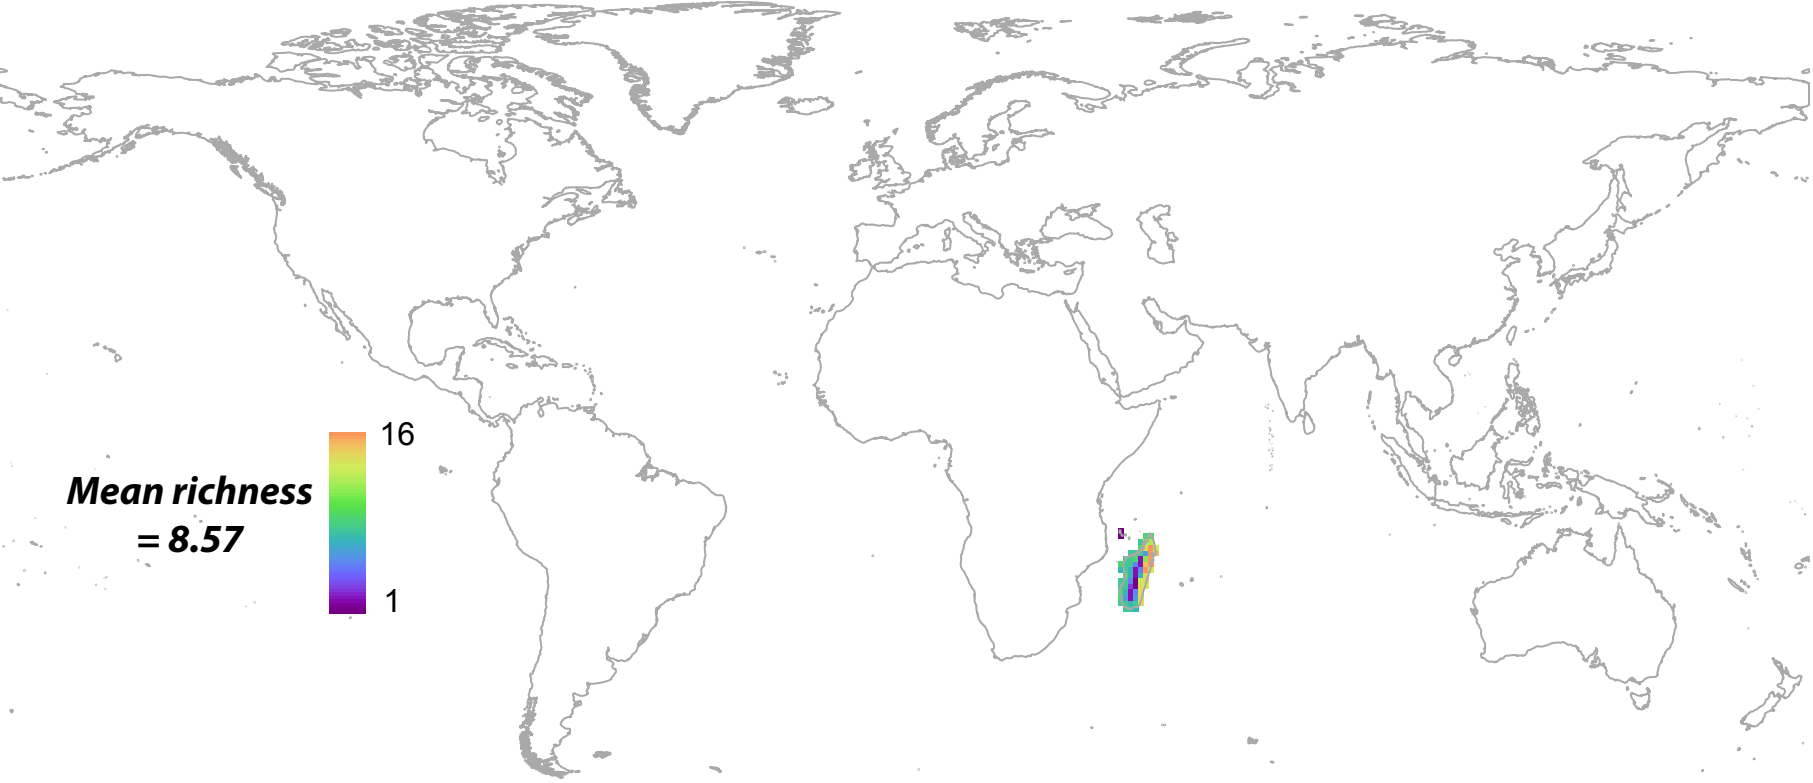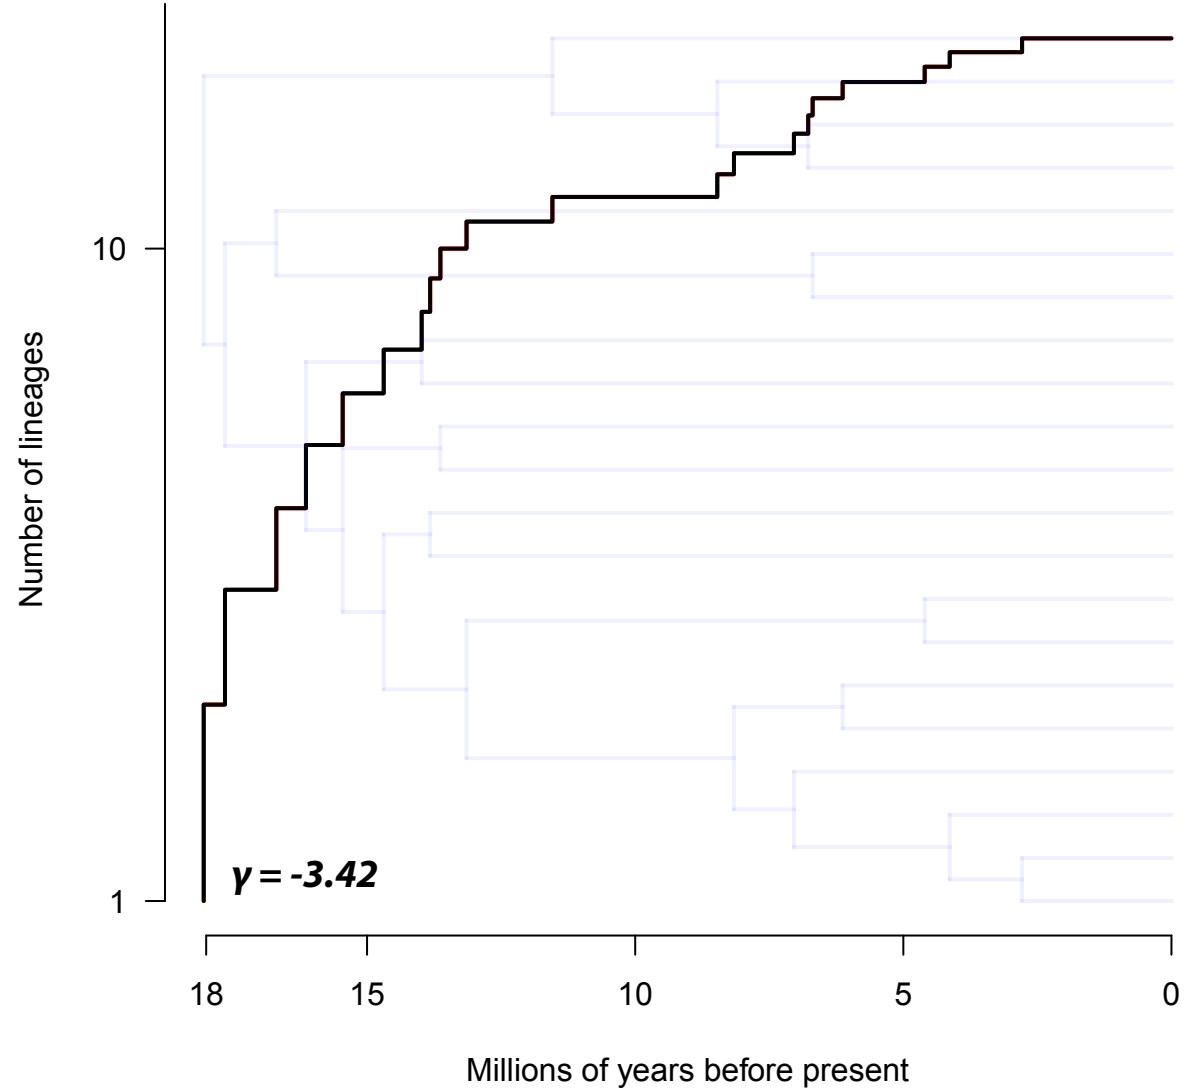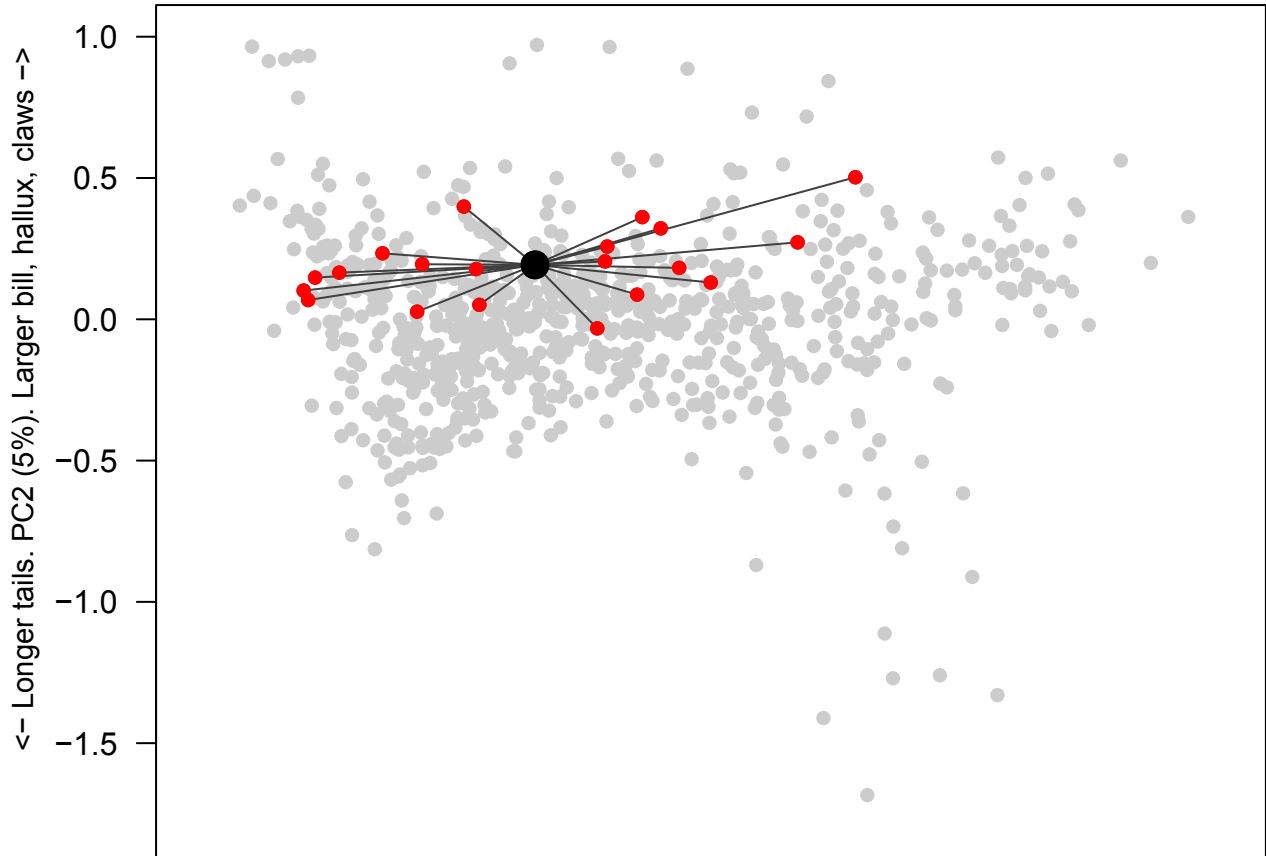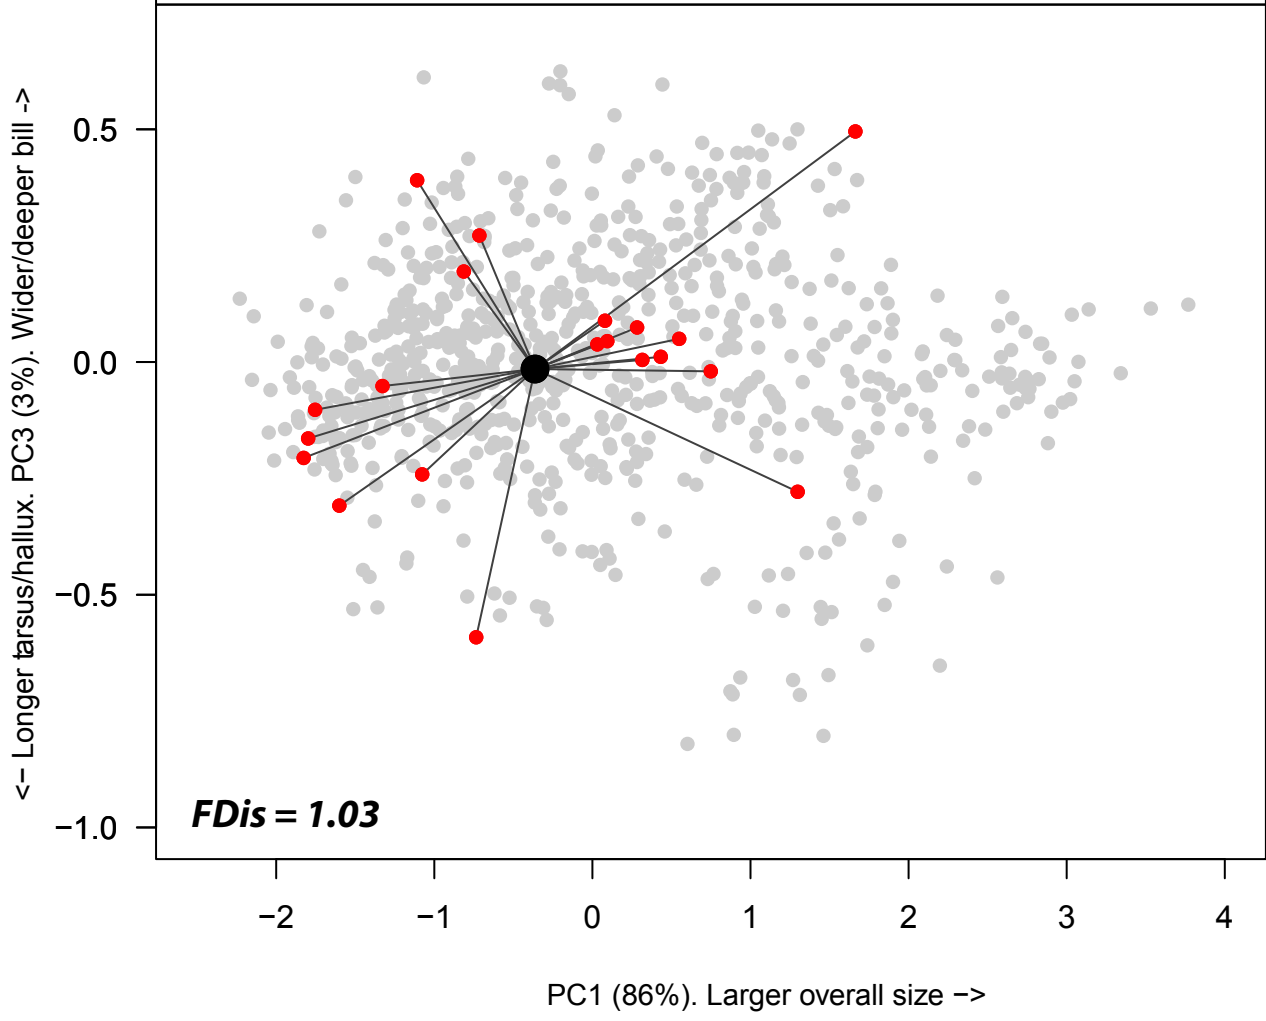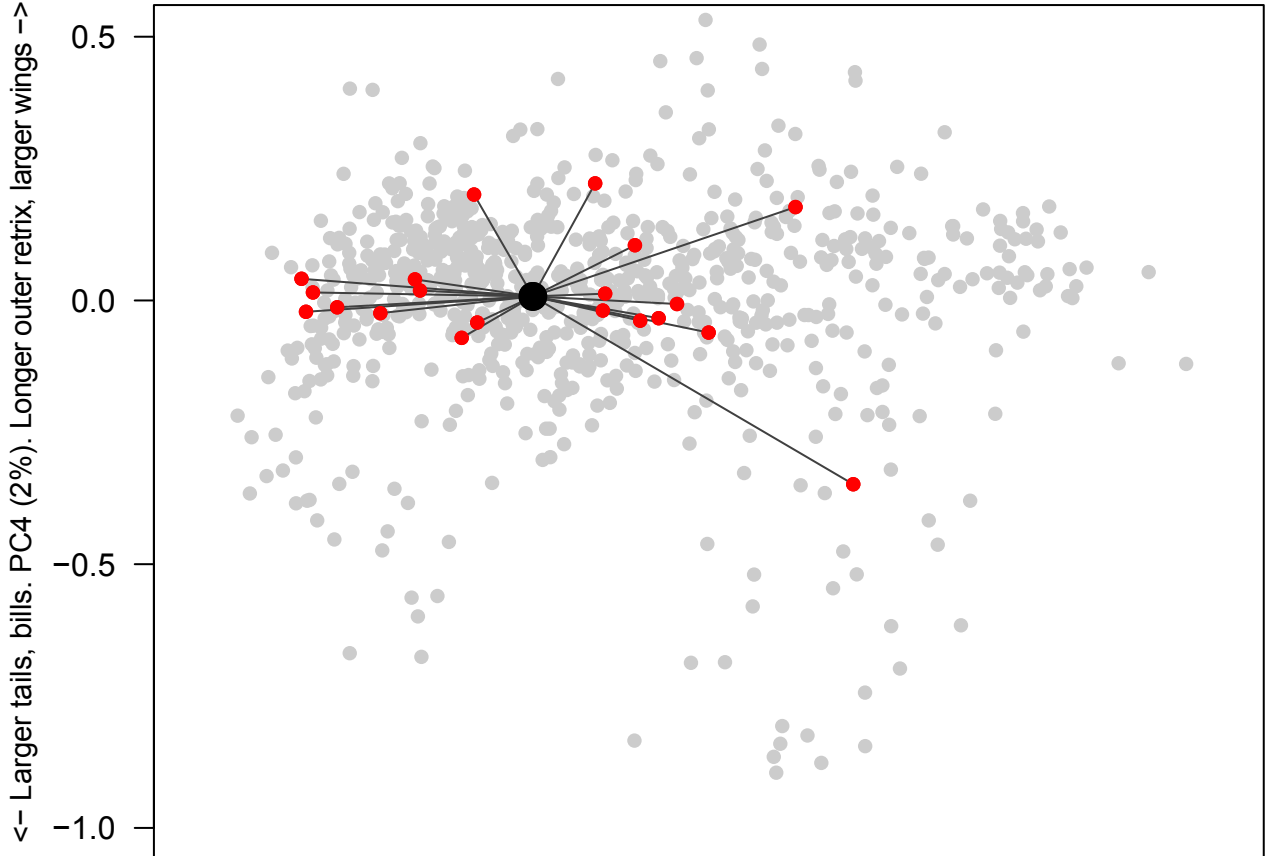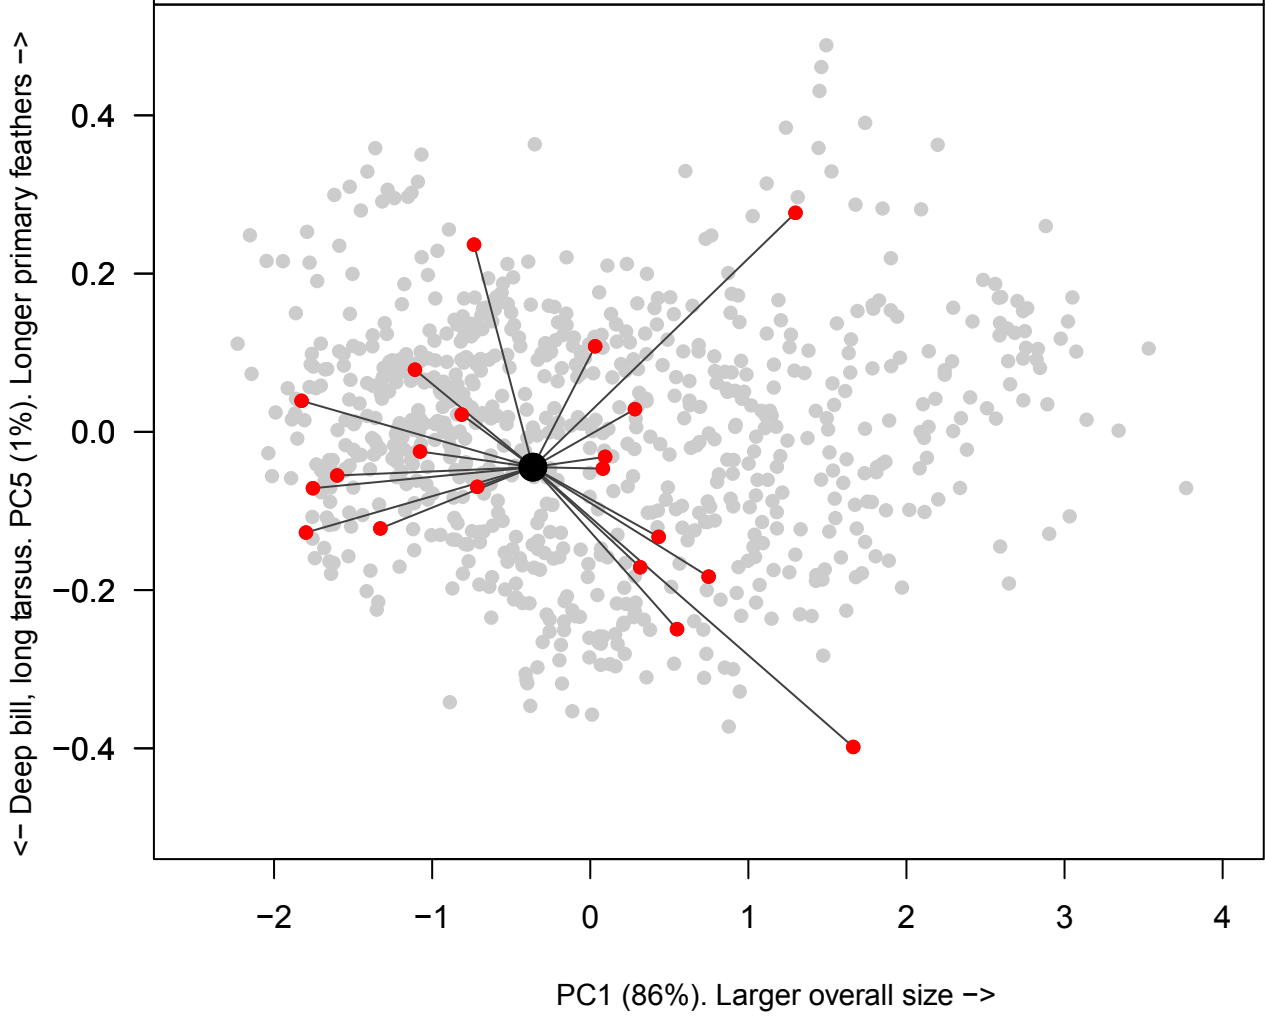

Supplement: rspb20182181supp21.pdf [file rspb20182181supp21.pdf]

# o) Vireonidae - 63 species

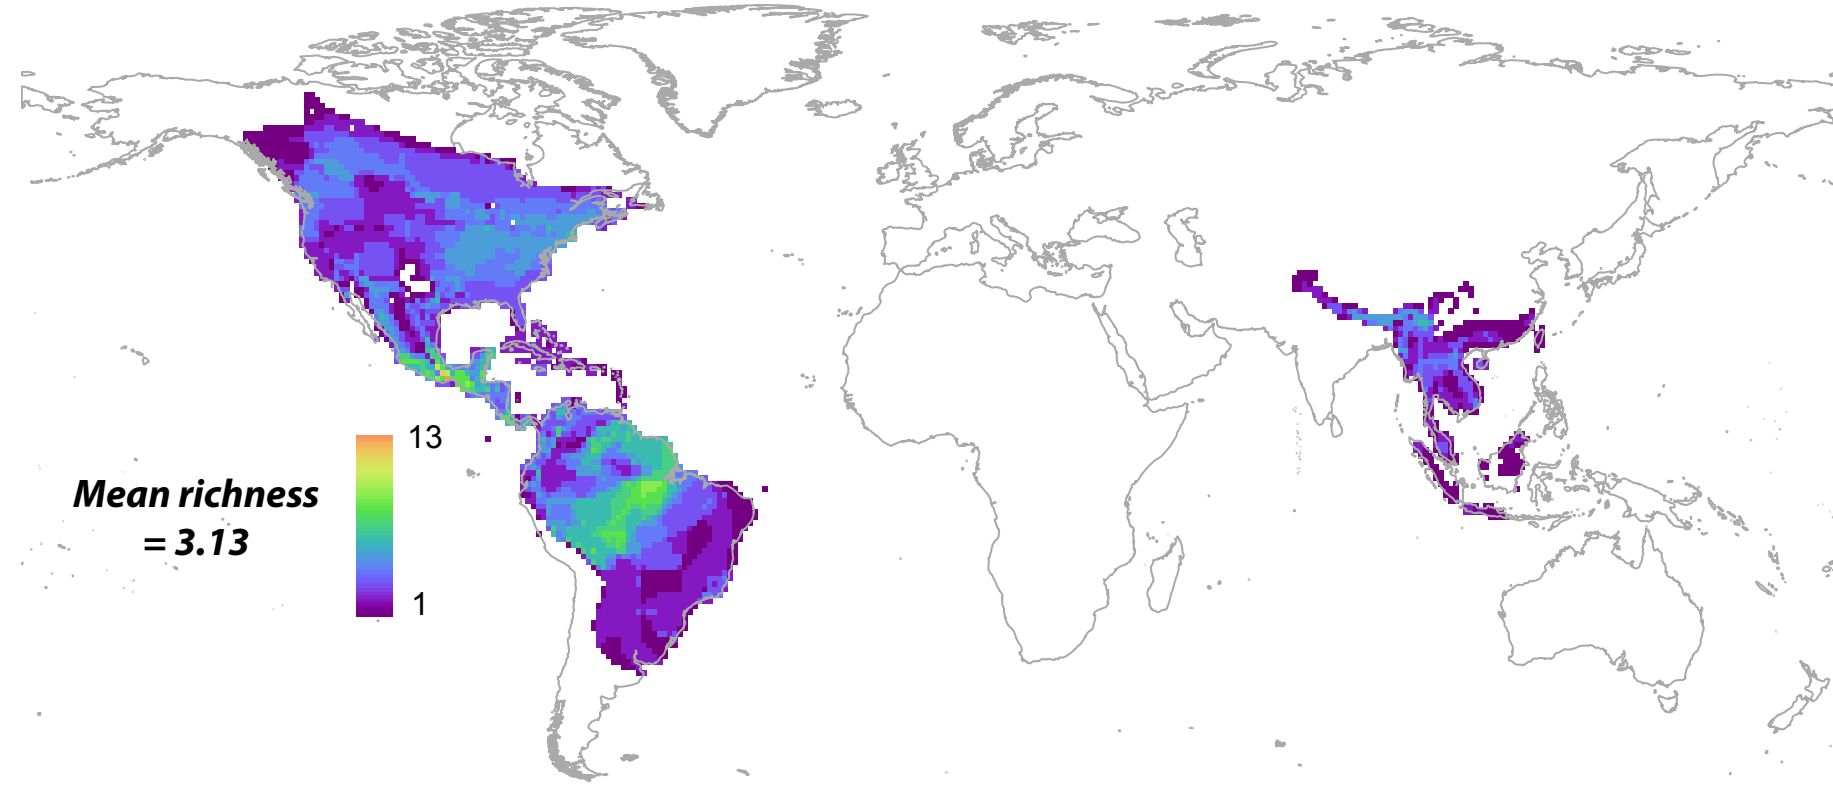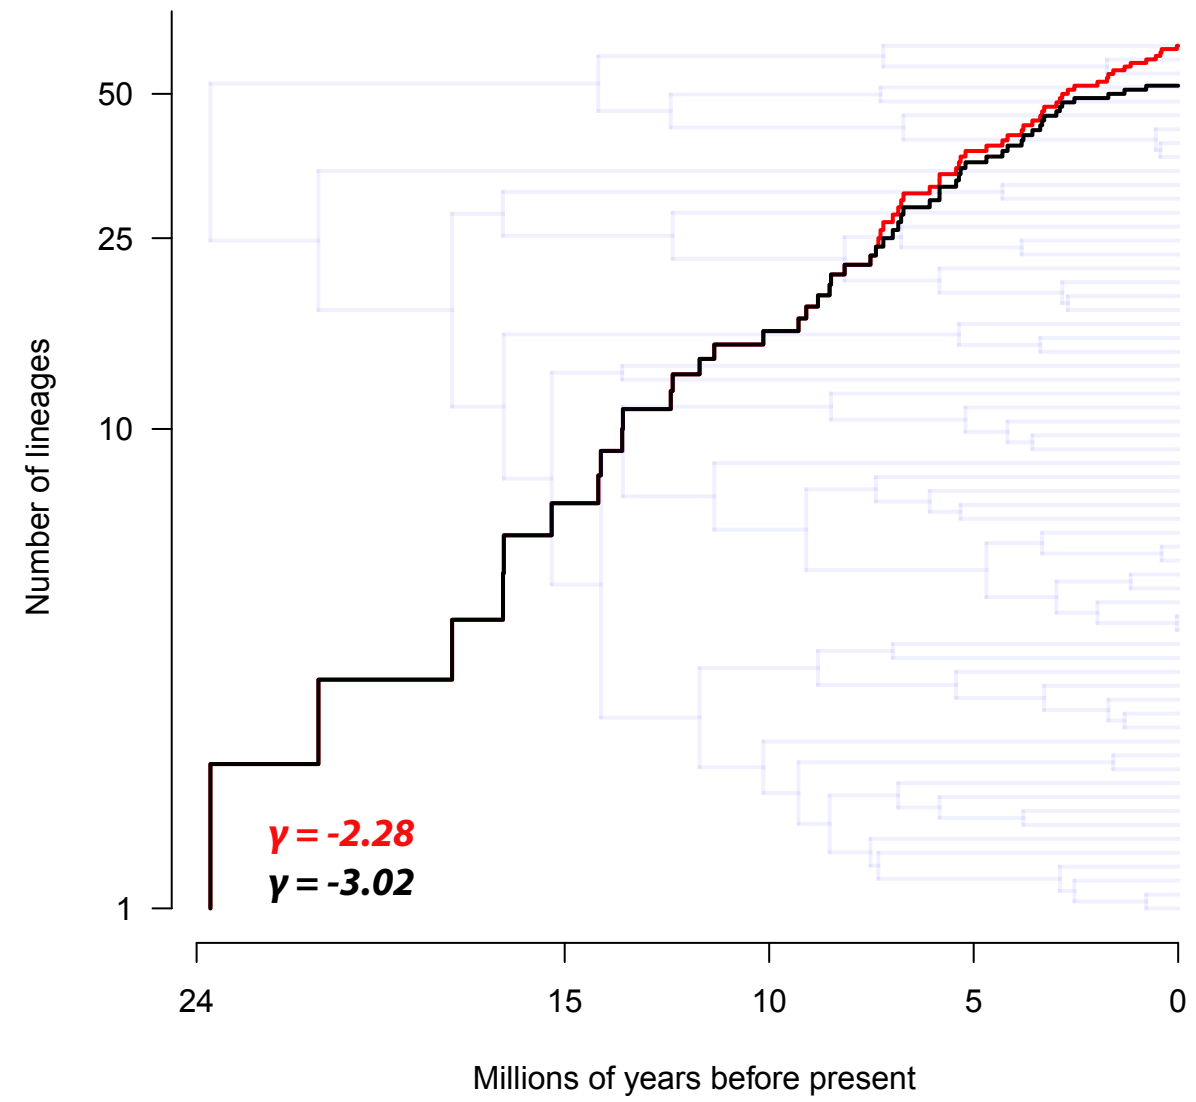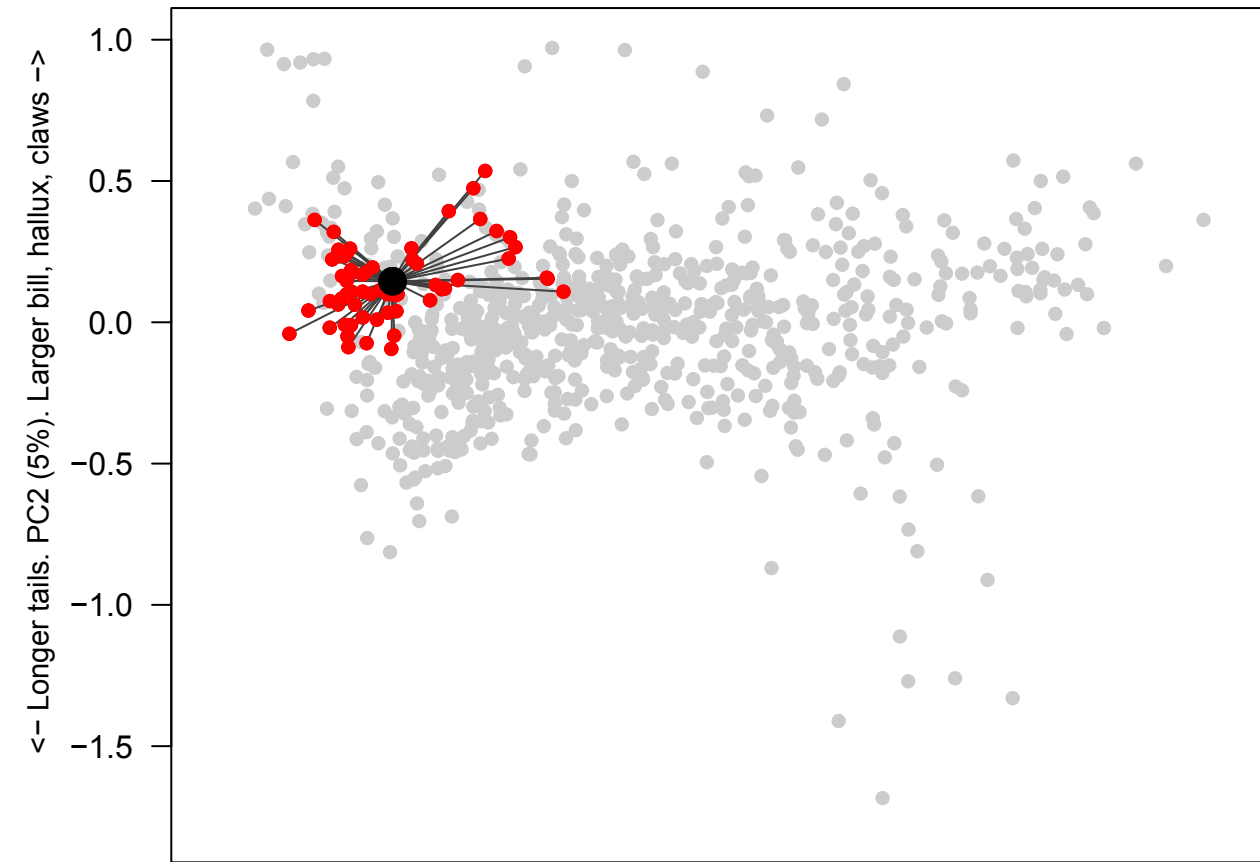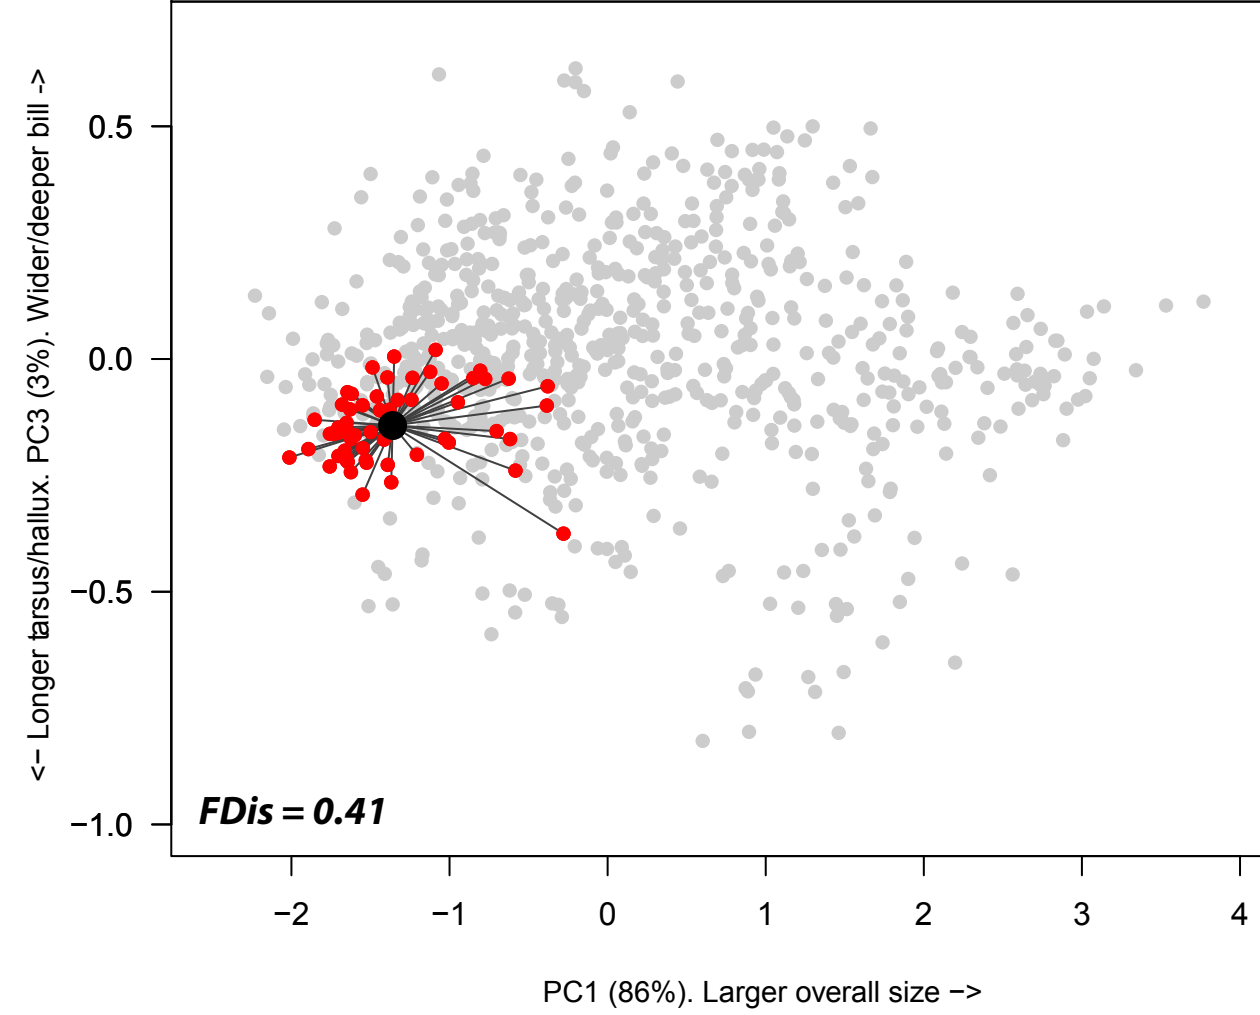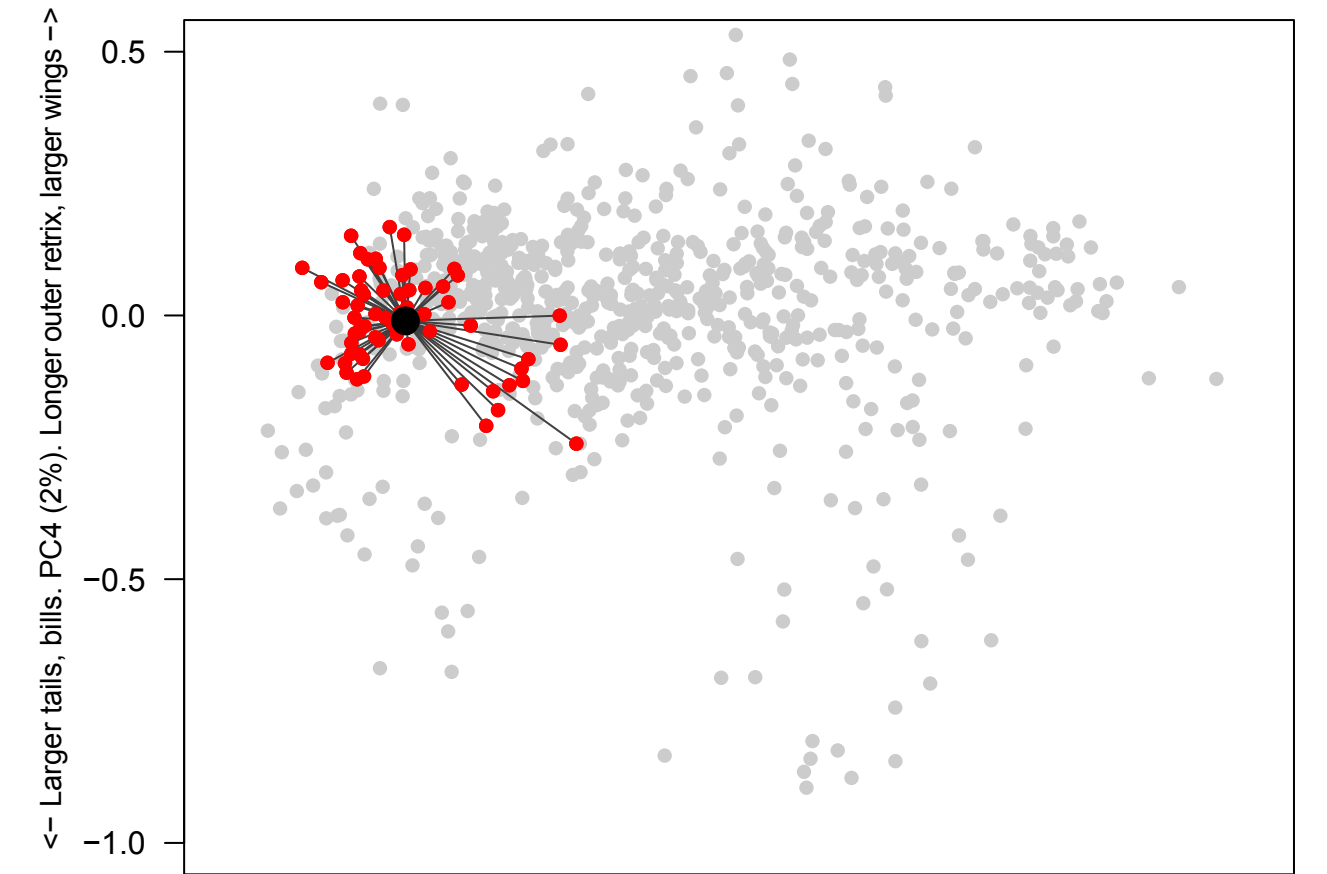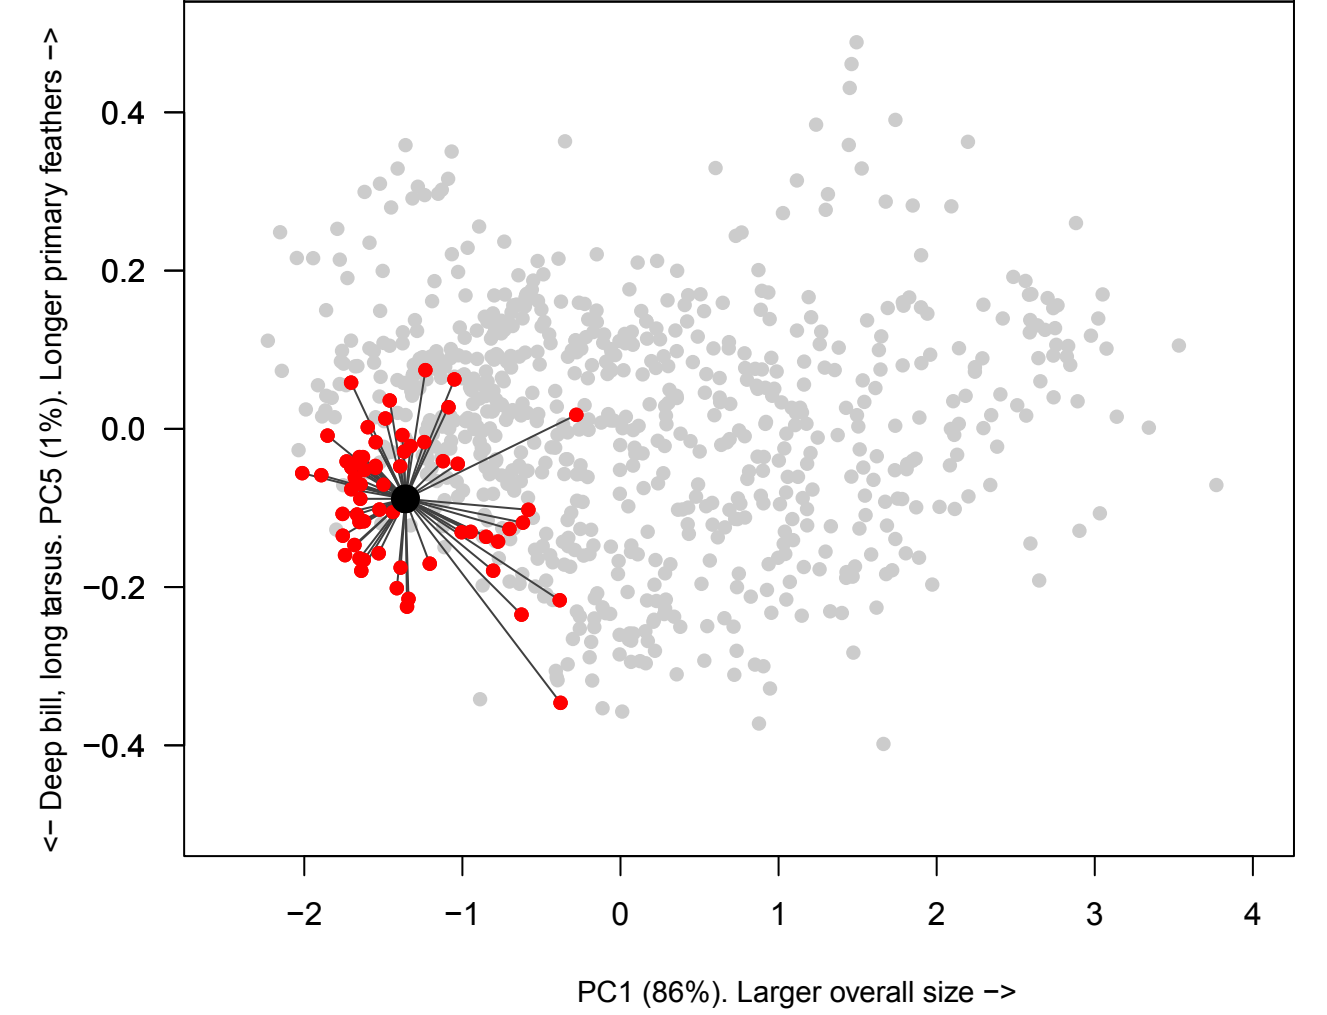

Supplement: rspb20182181supp22.pdf [file rspb20182181supp22.pdf]

# Model 1

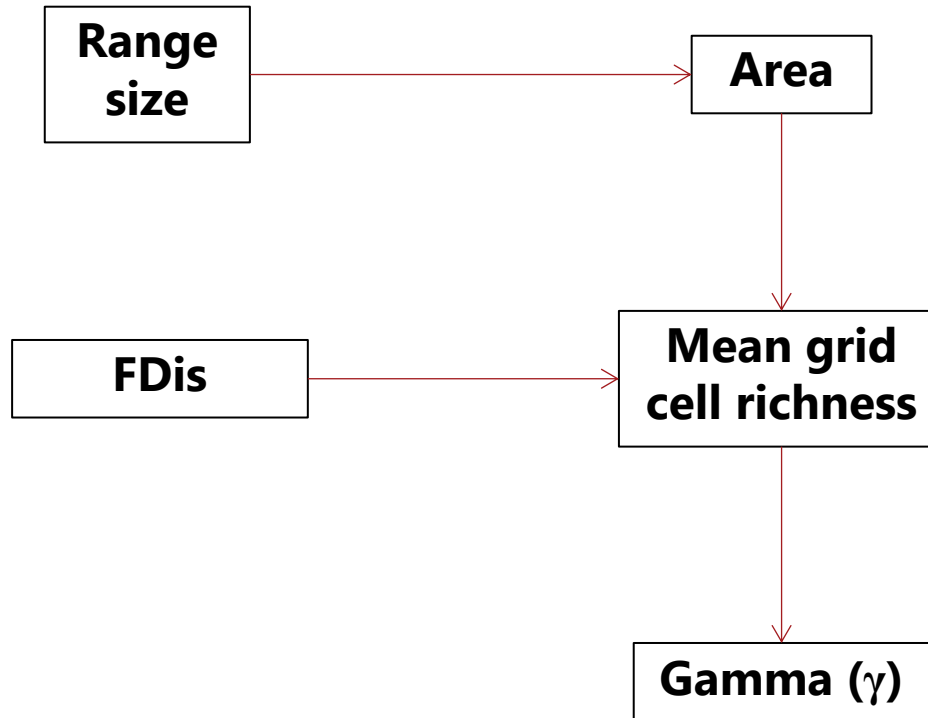

## Model 2

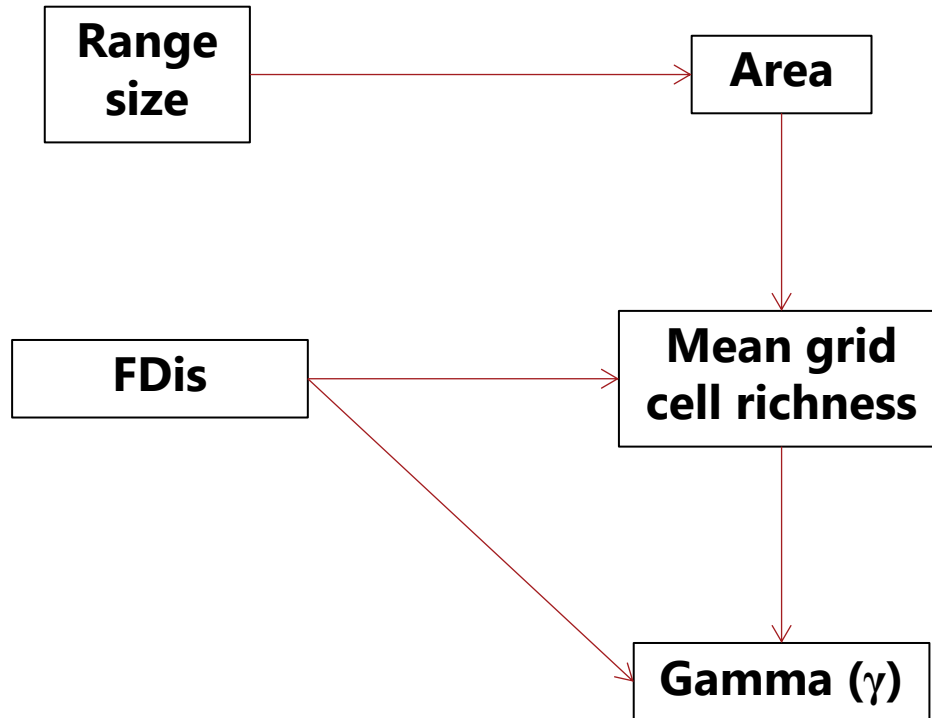

**Model 3**

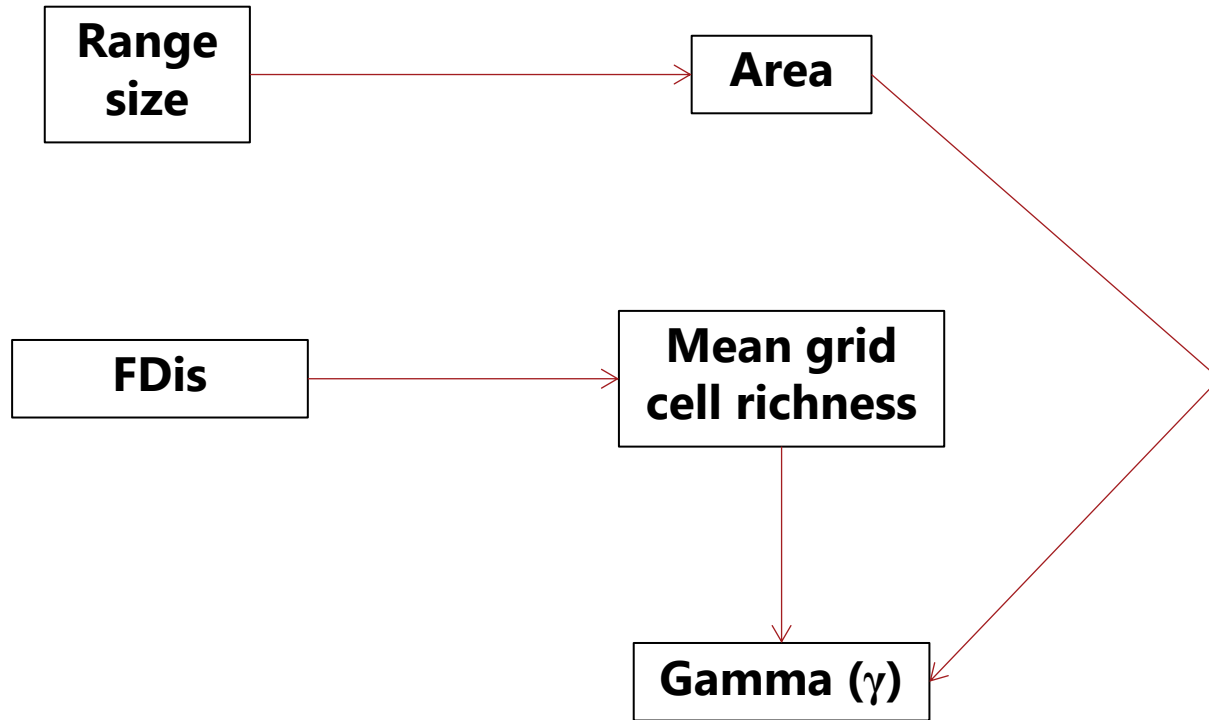

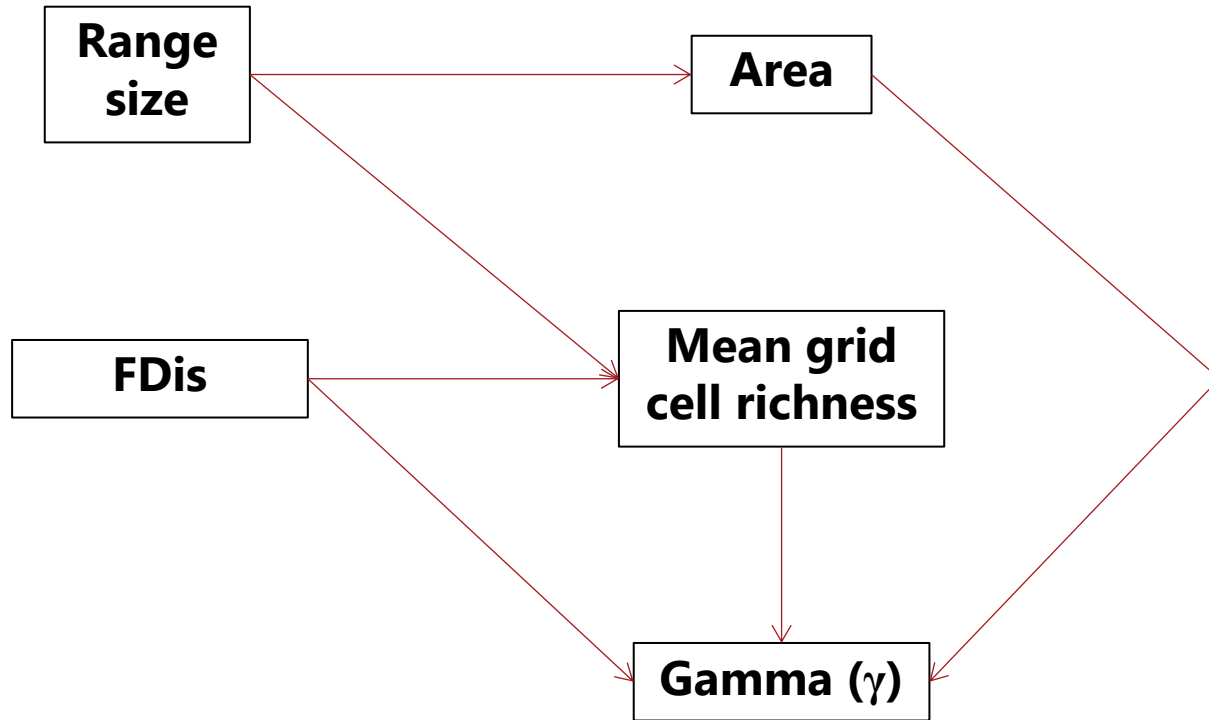

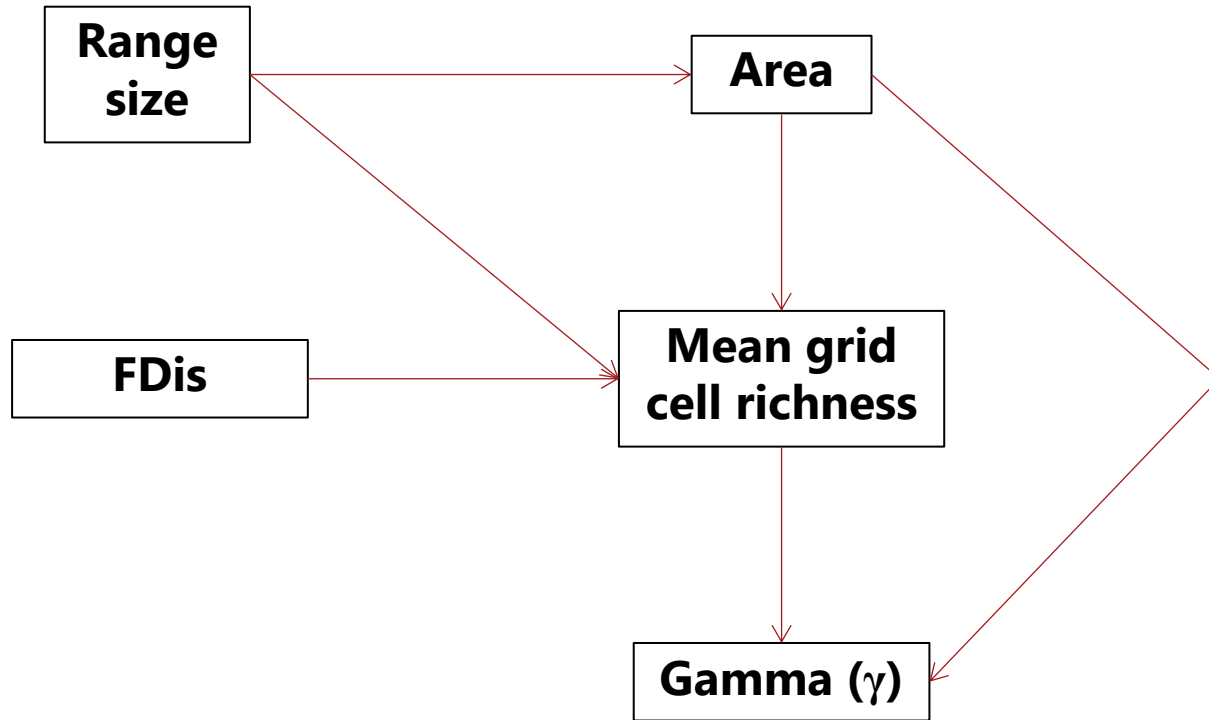

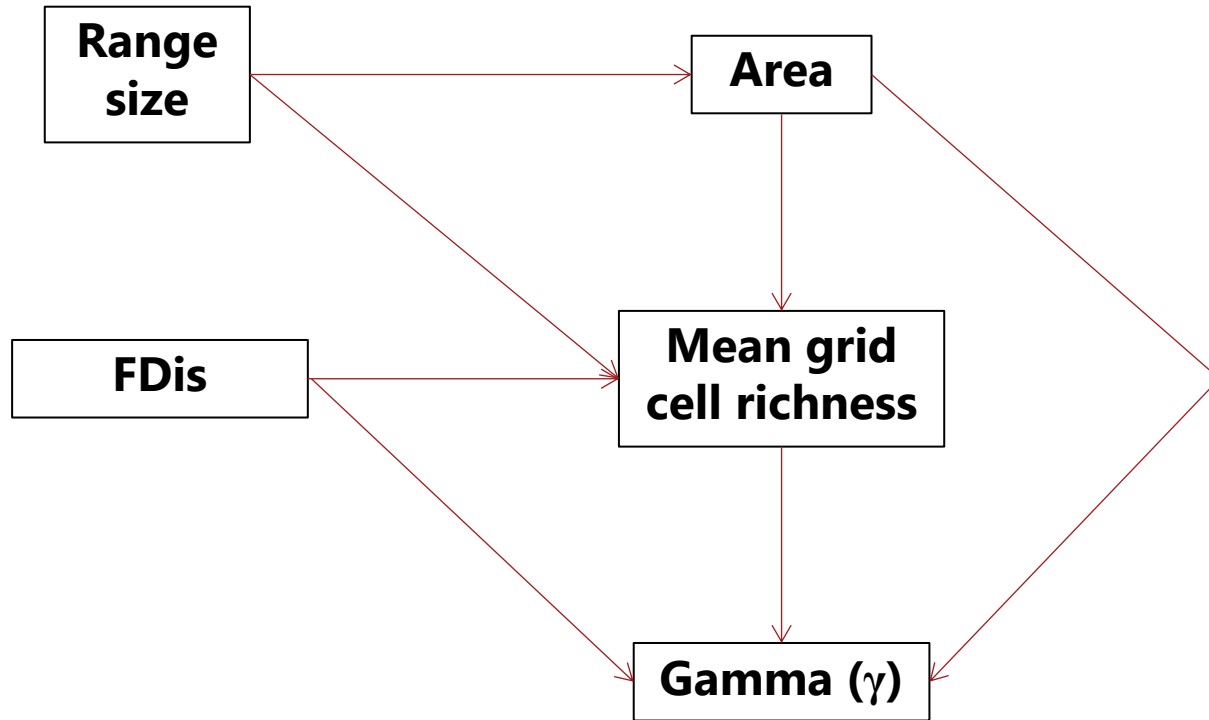

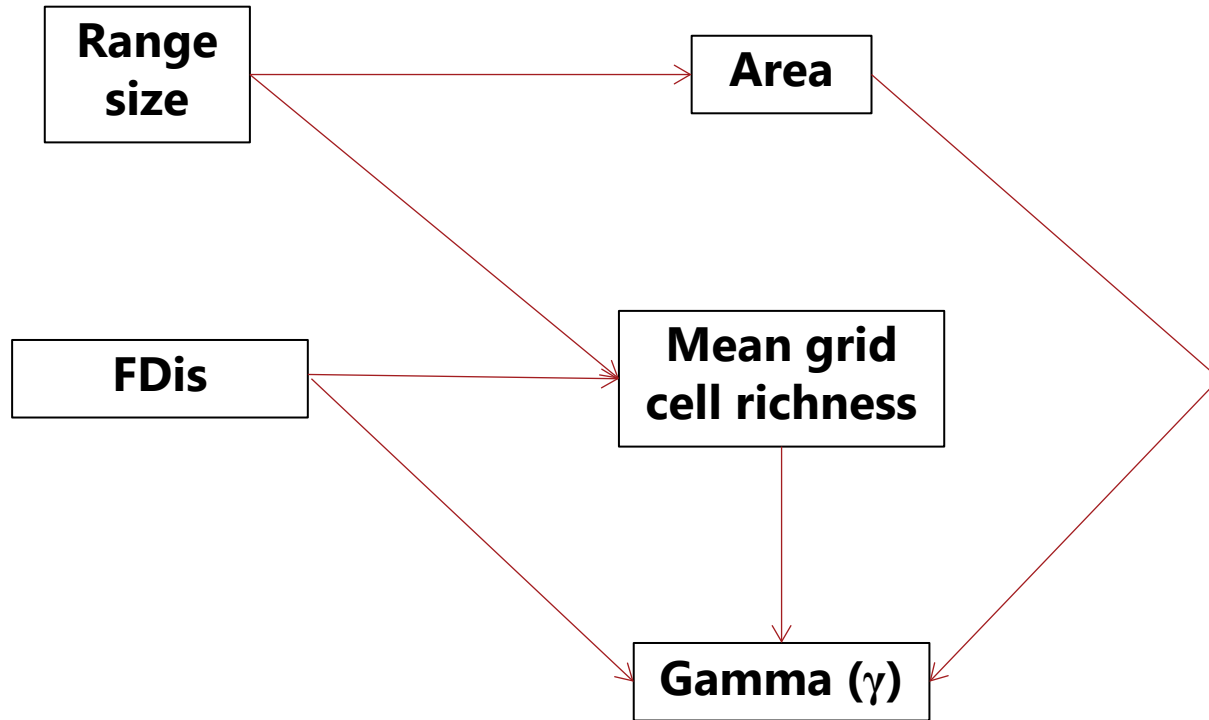

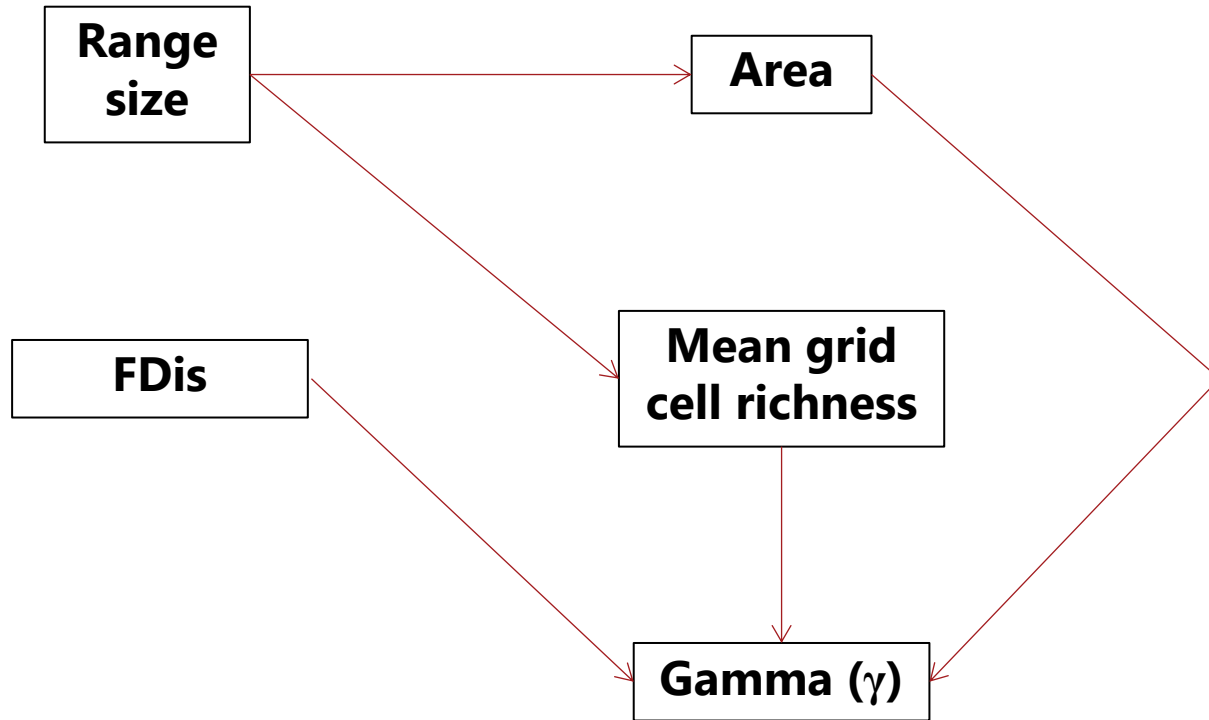



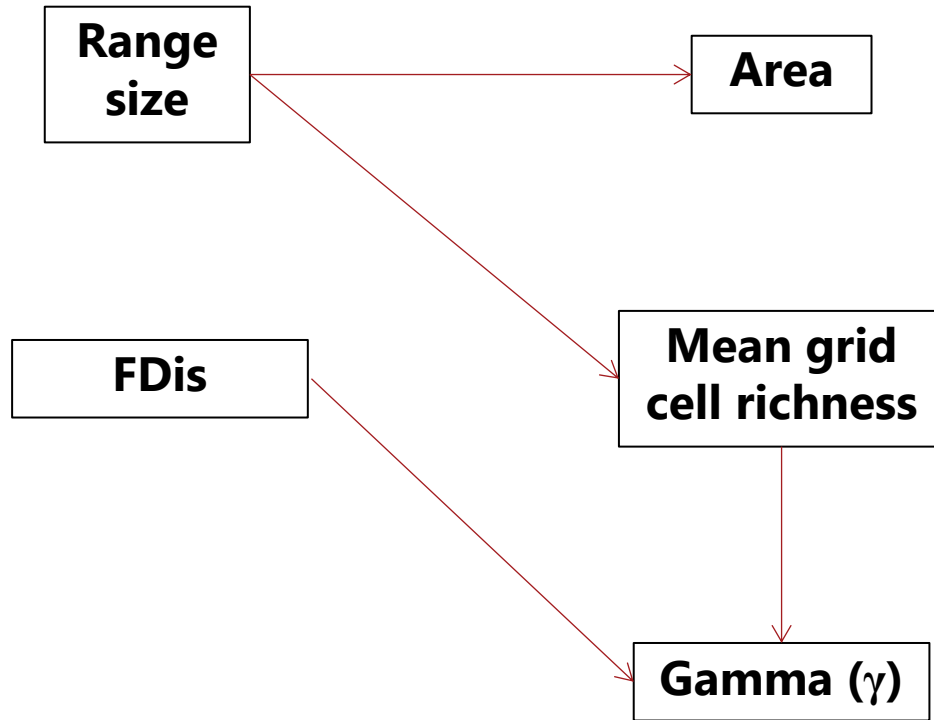

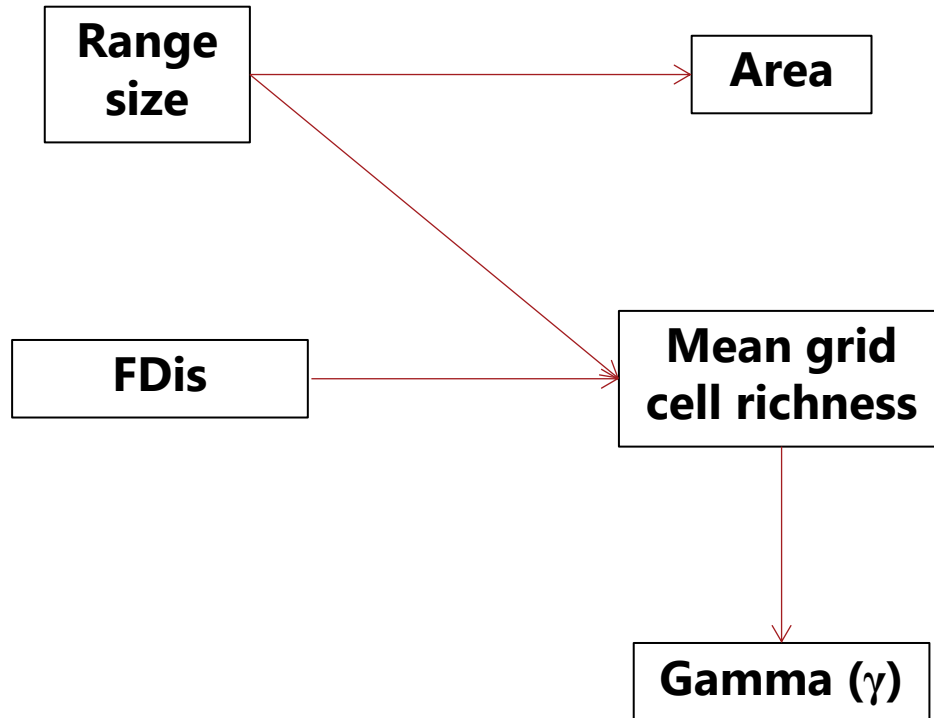

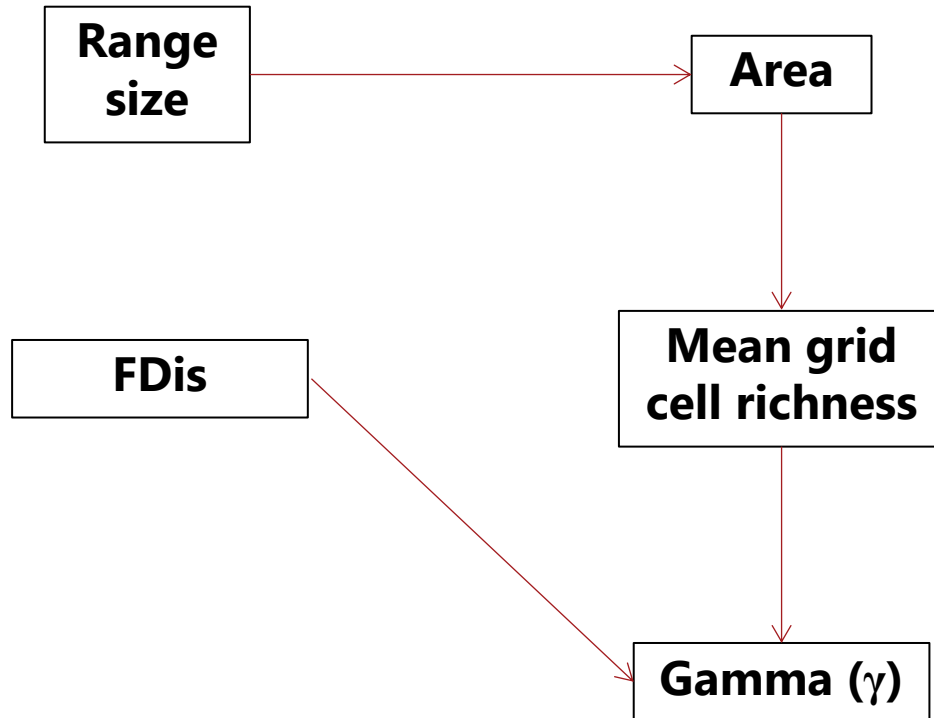

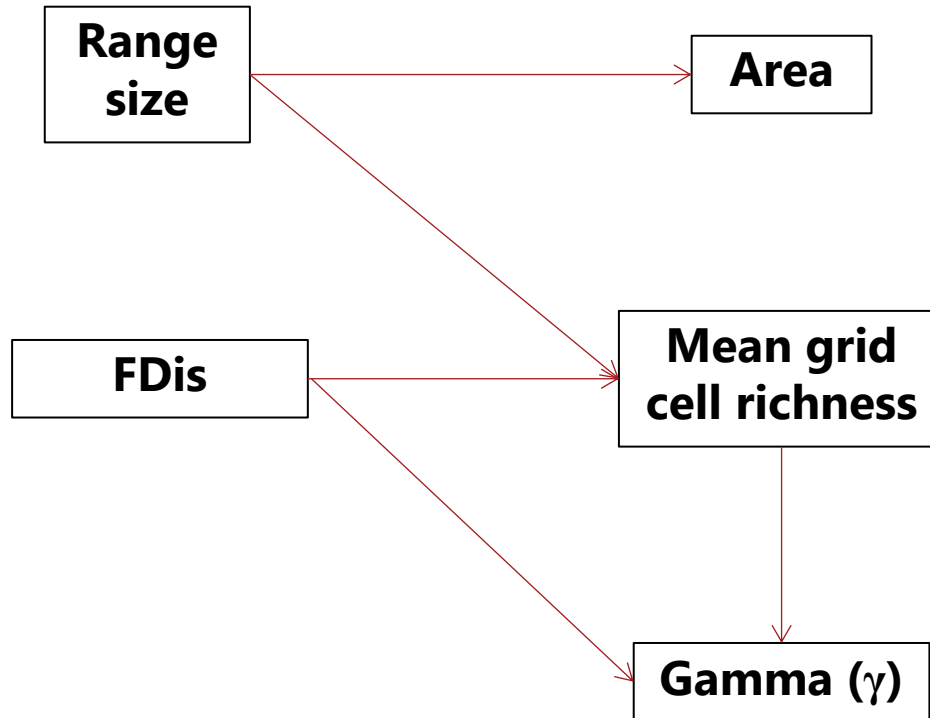

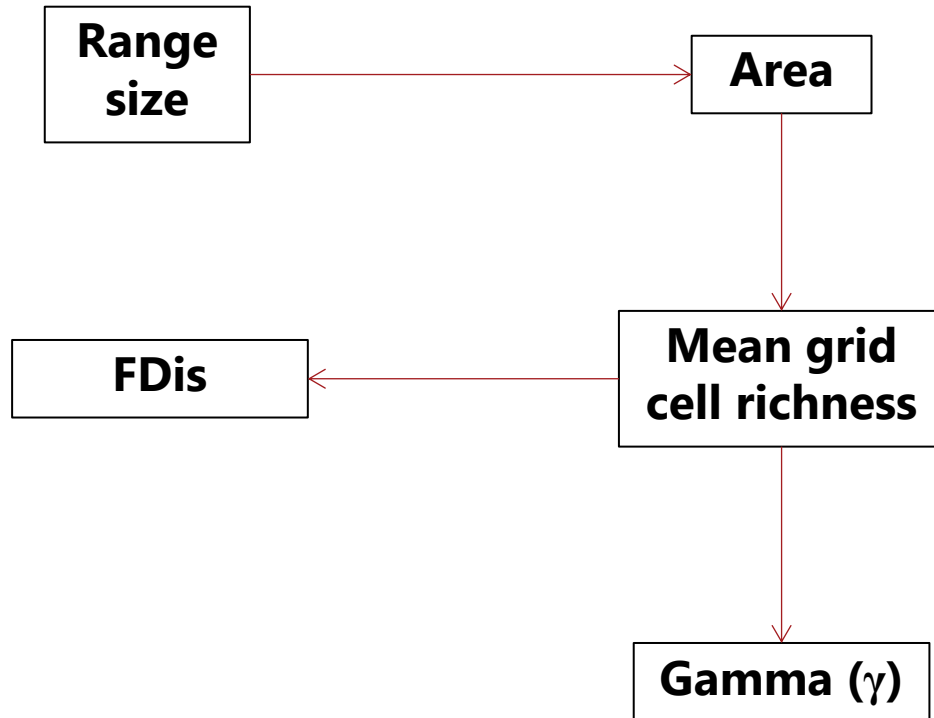

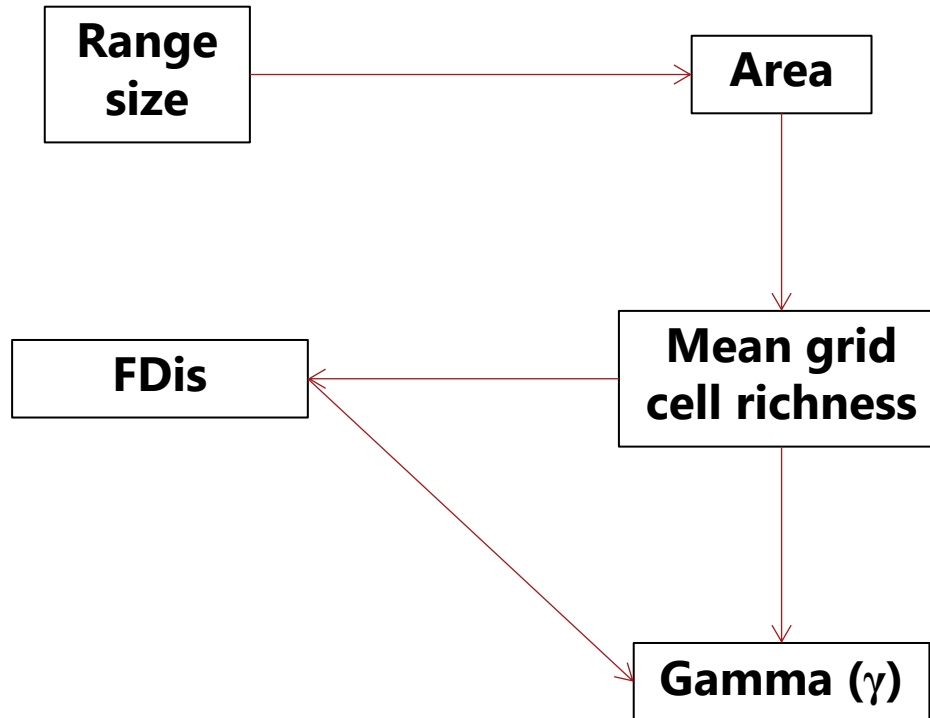

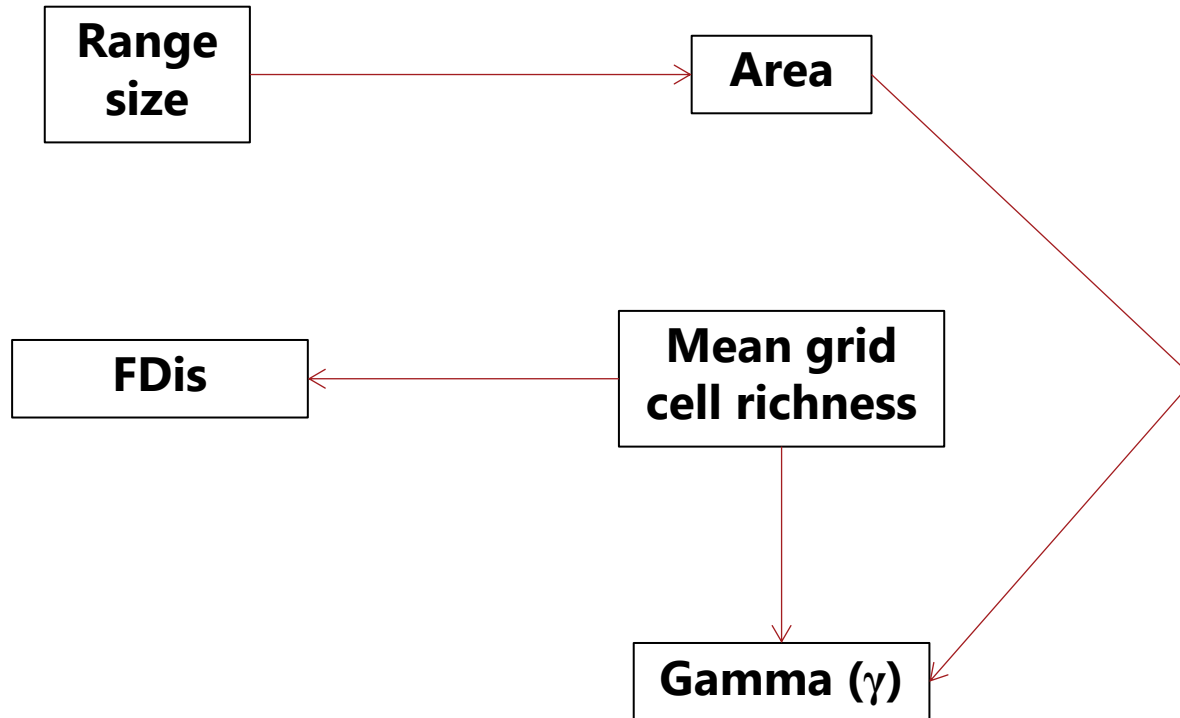

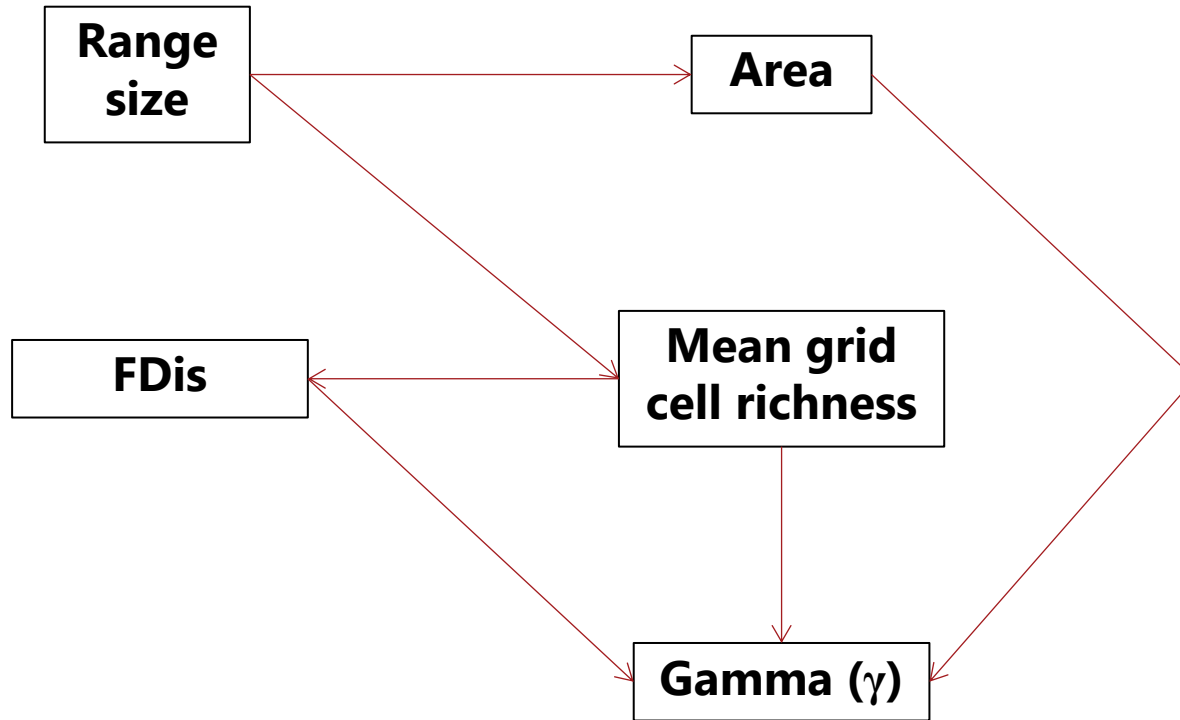



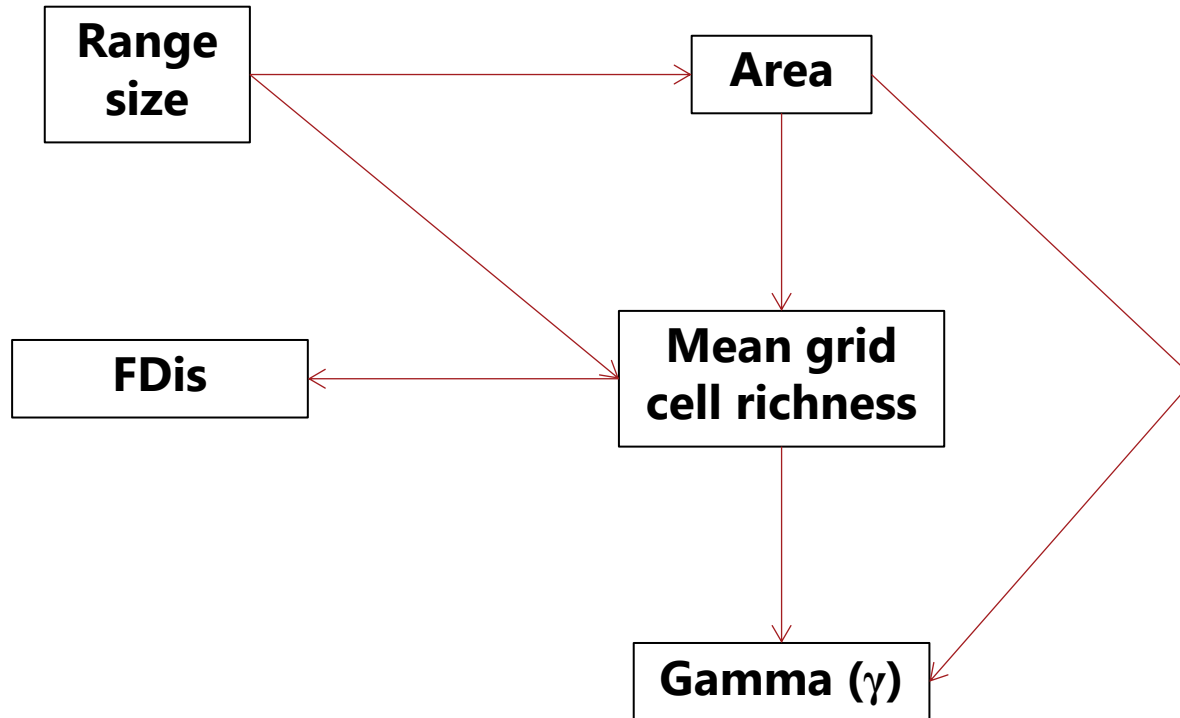

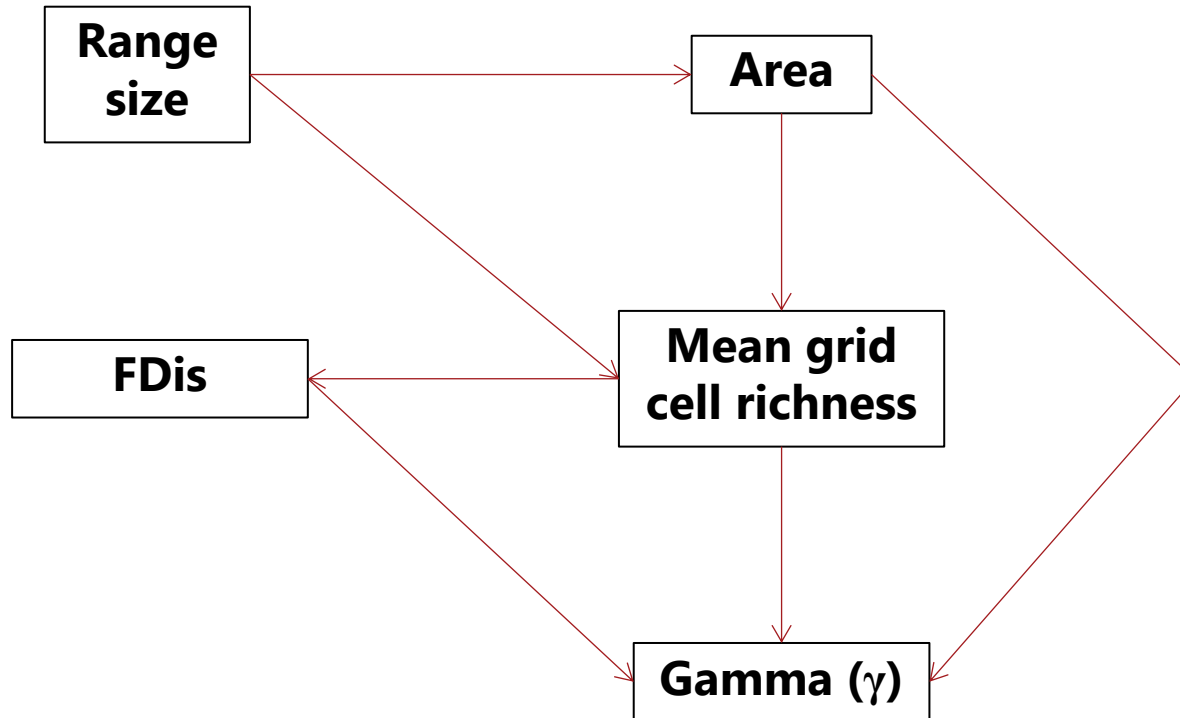

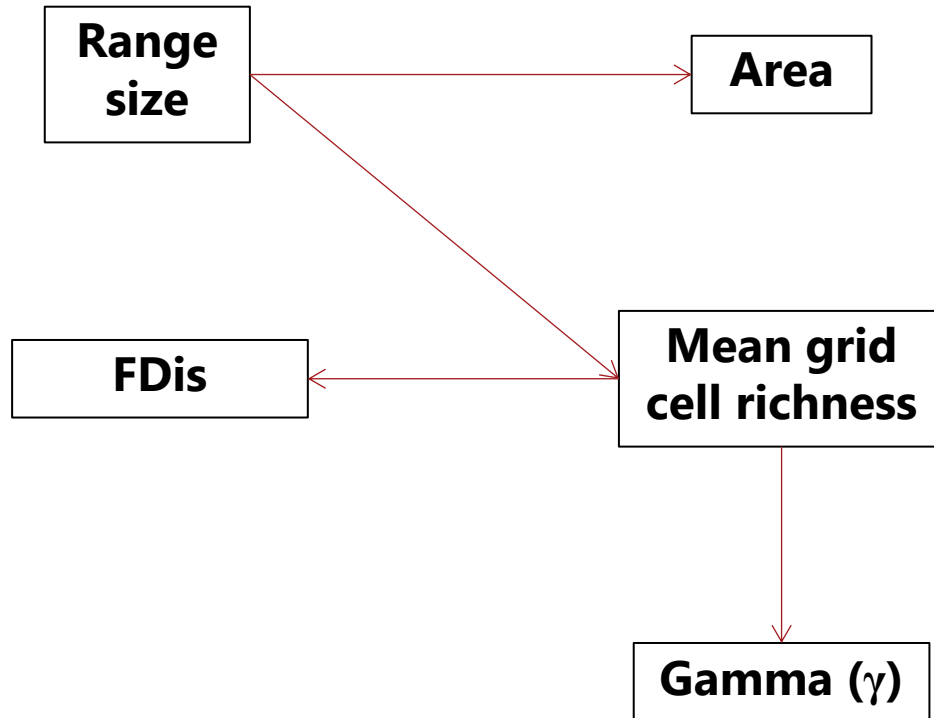

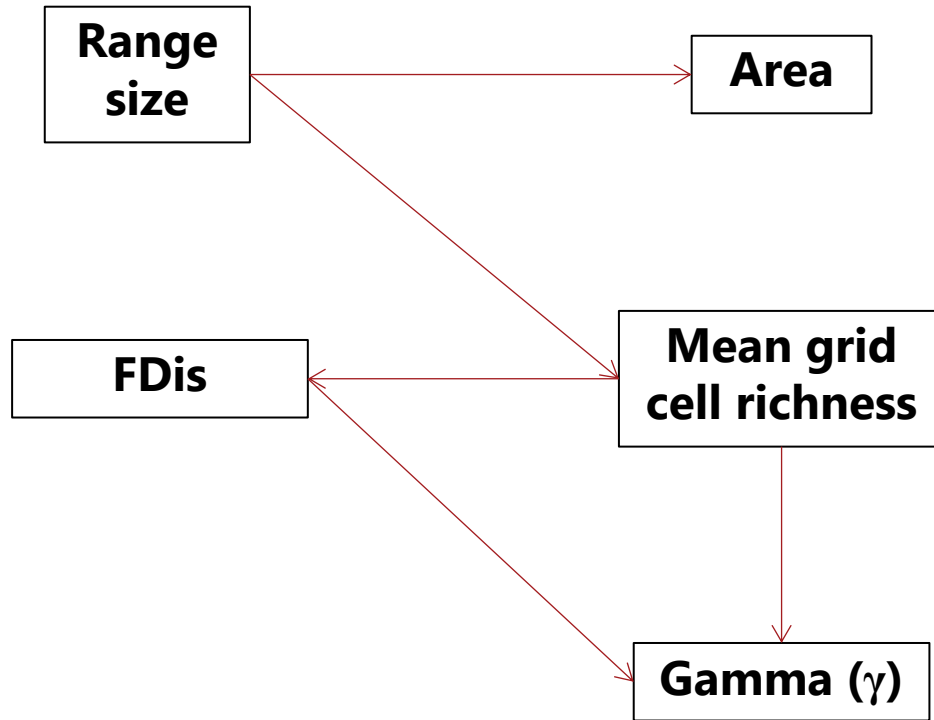

Supplement: rspb20182181supp3.pdf [file rspb20182181supp3.pdf]

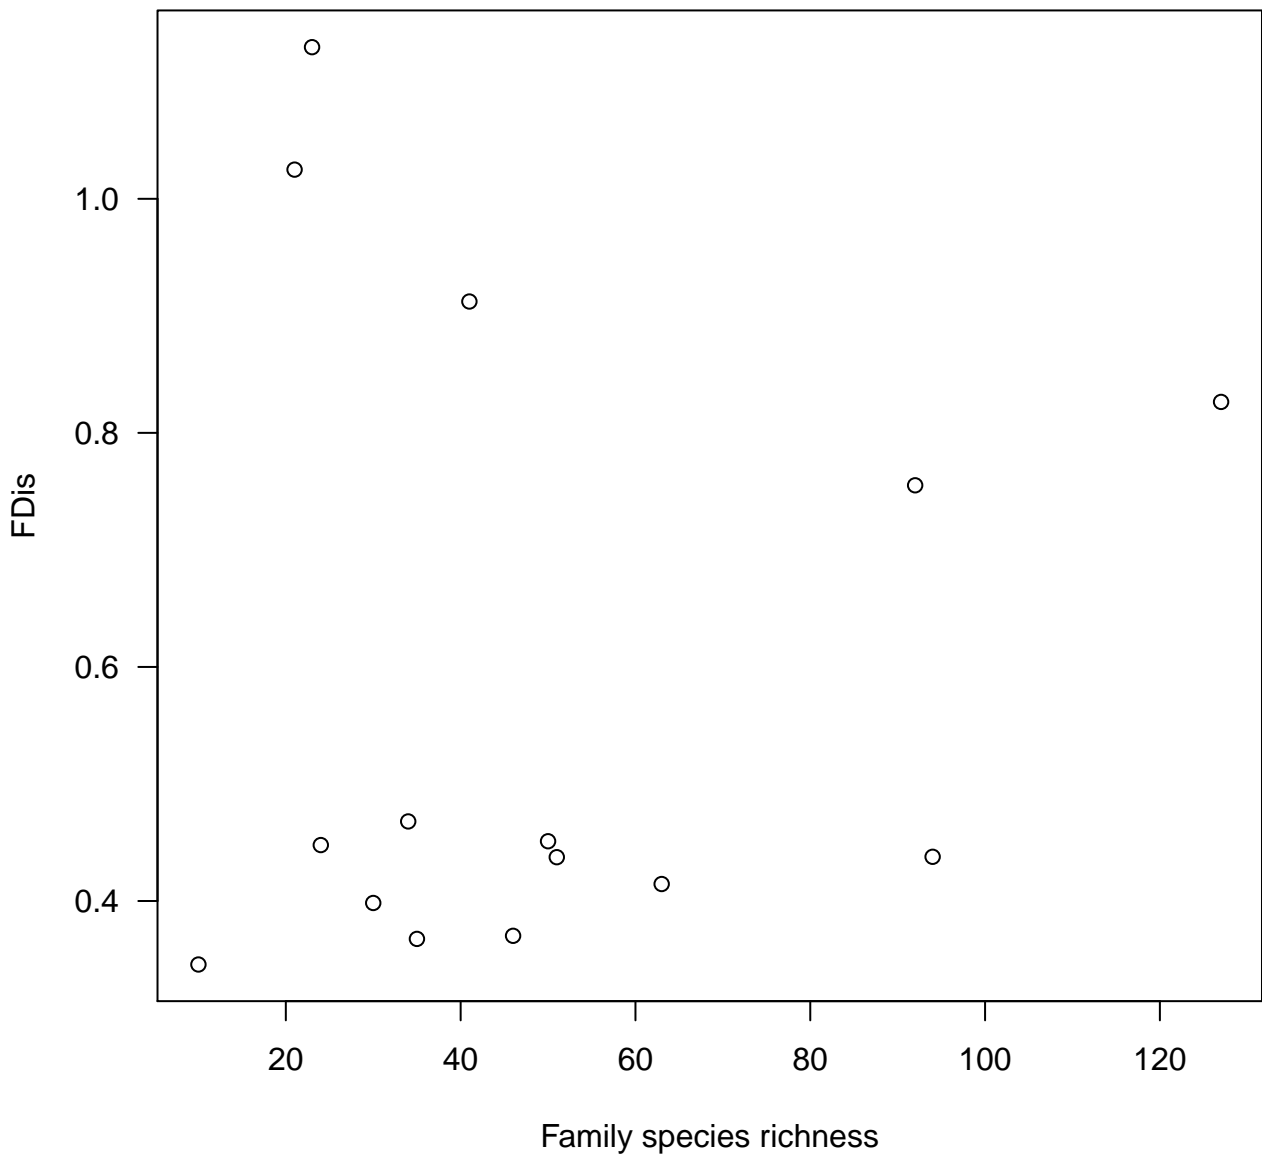

Supplement: rspb20182181supp5.pdf [file rspb20182181supp5.pdf]

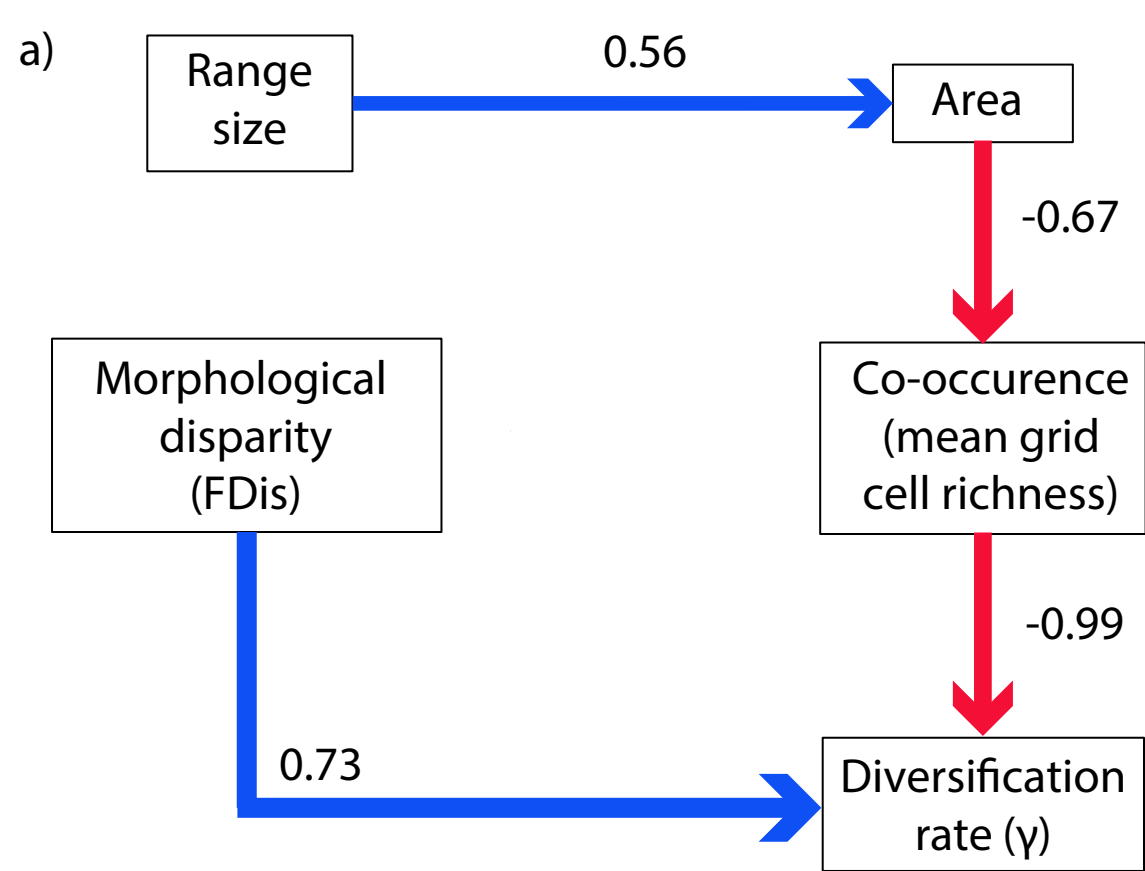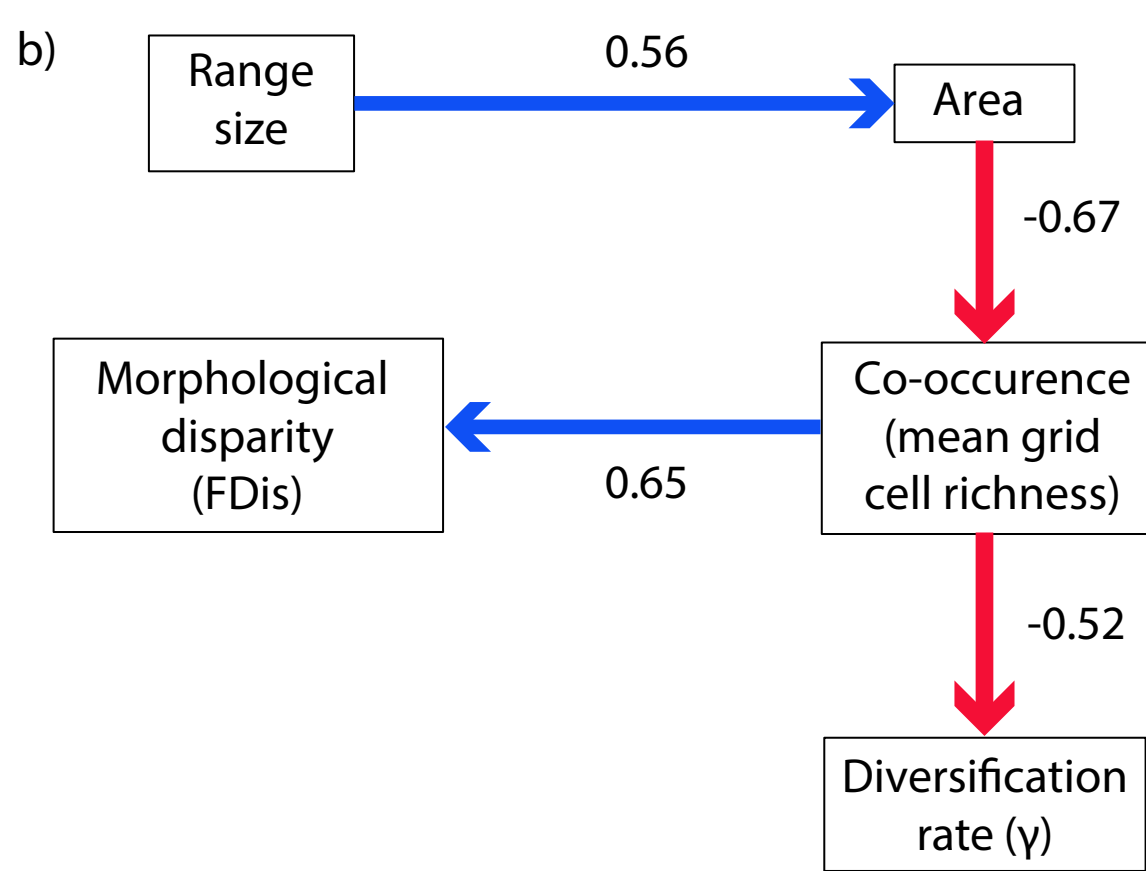

Supplement: rspb20182181supp6.pdf [file rspb20182181supp6.pdf]

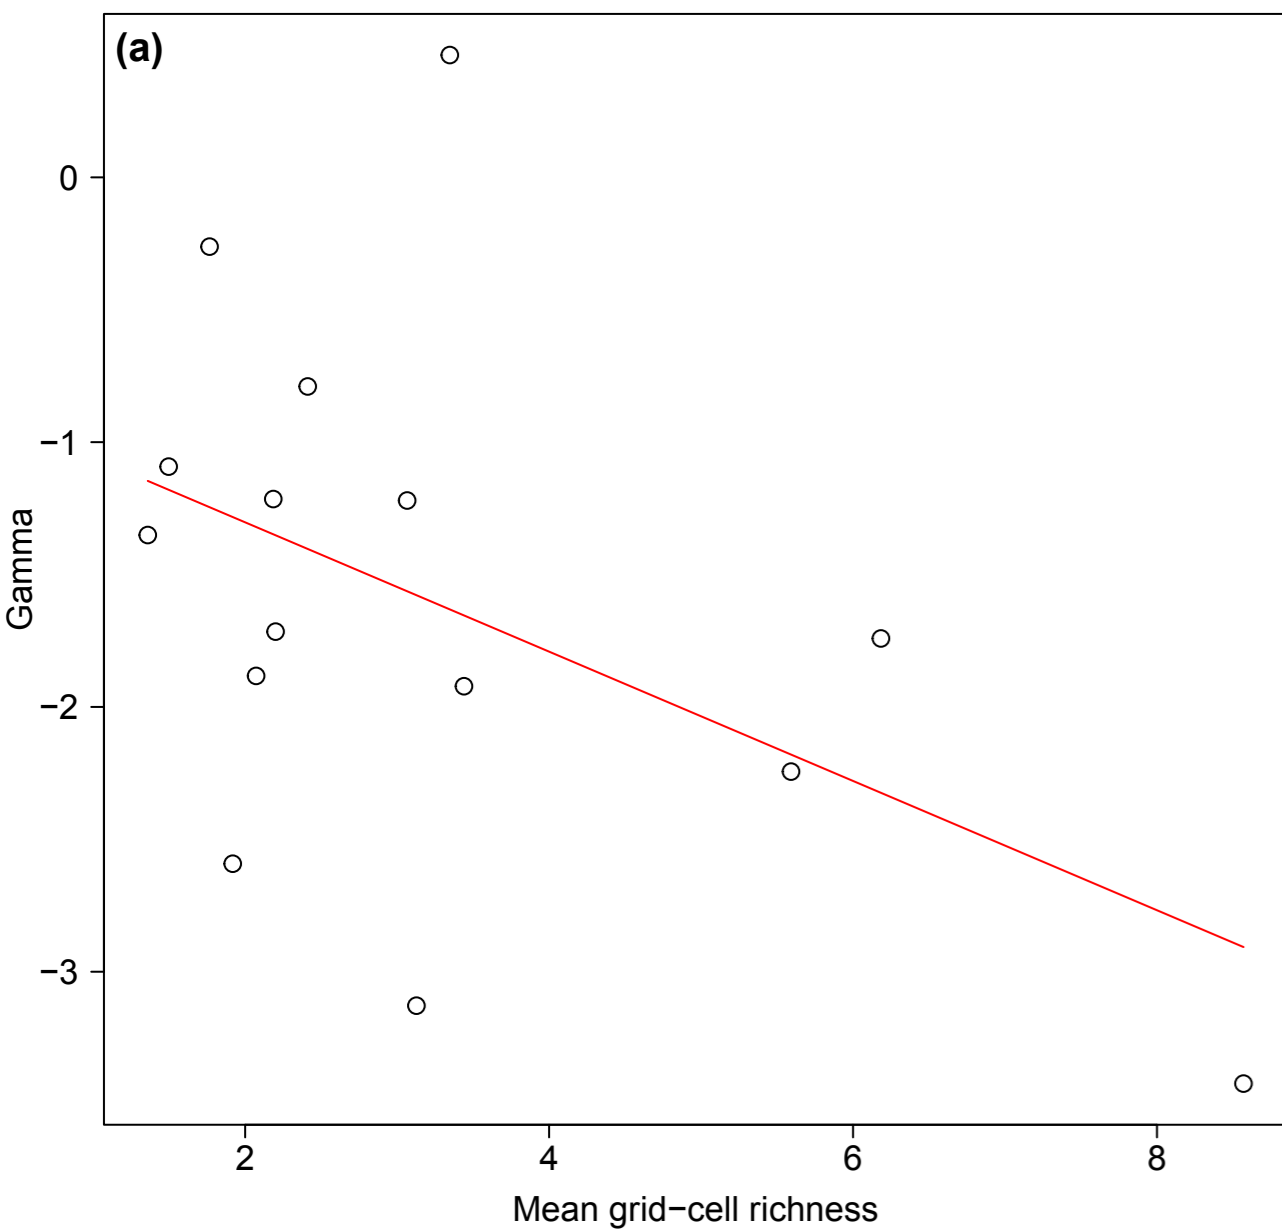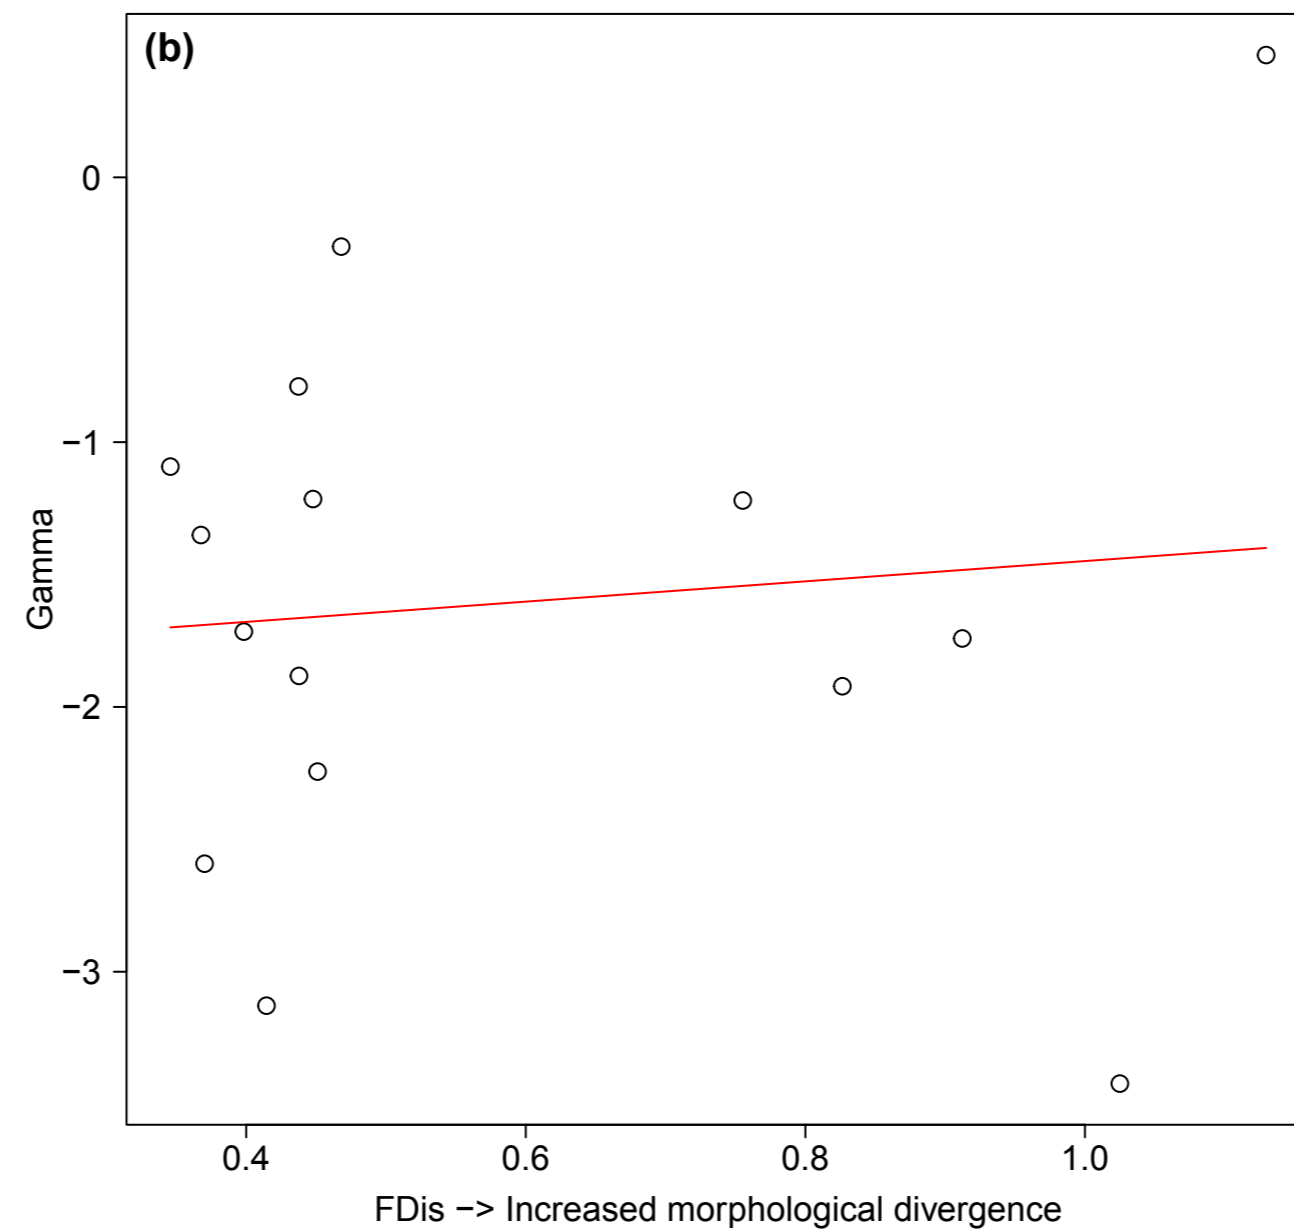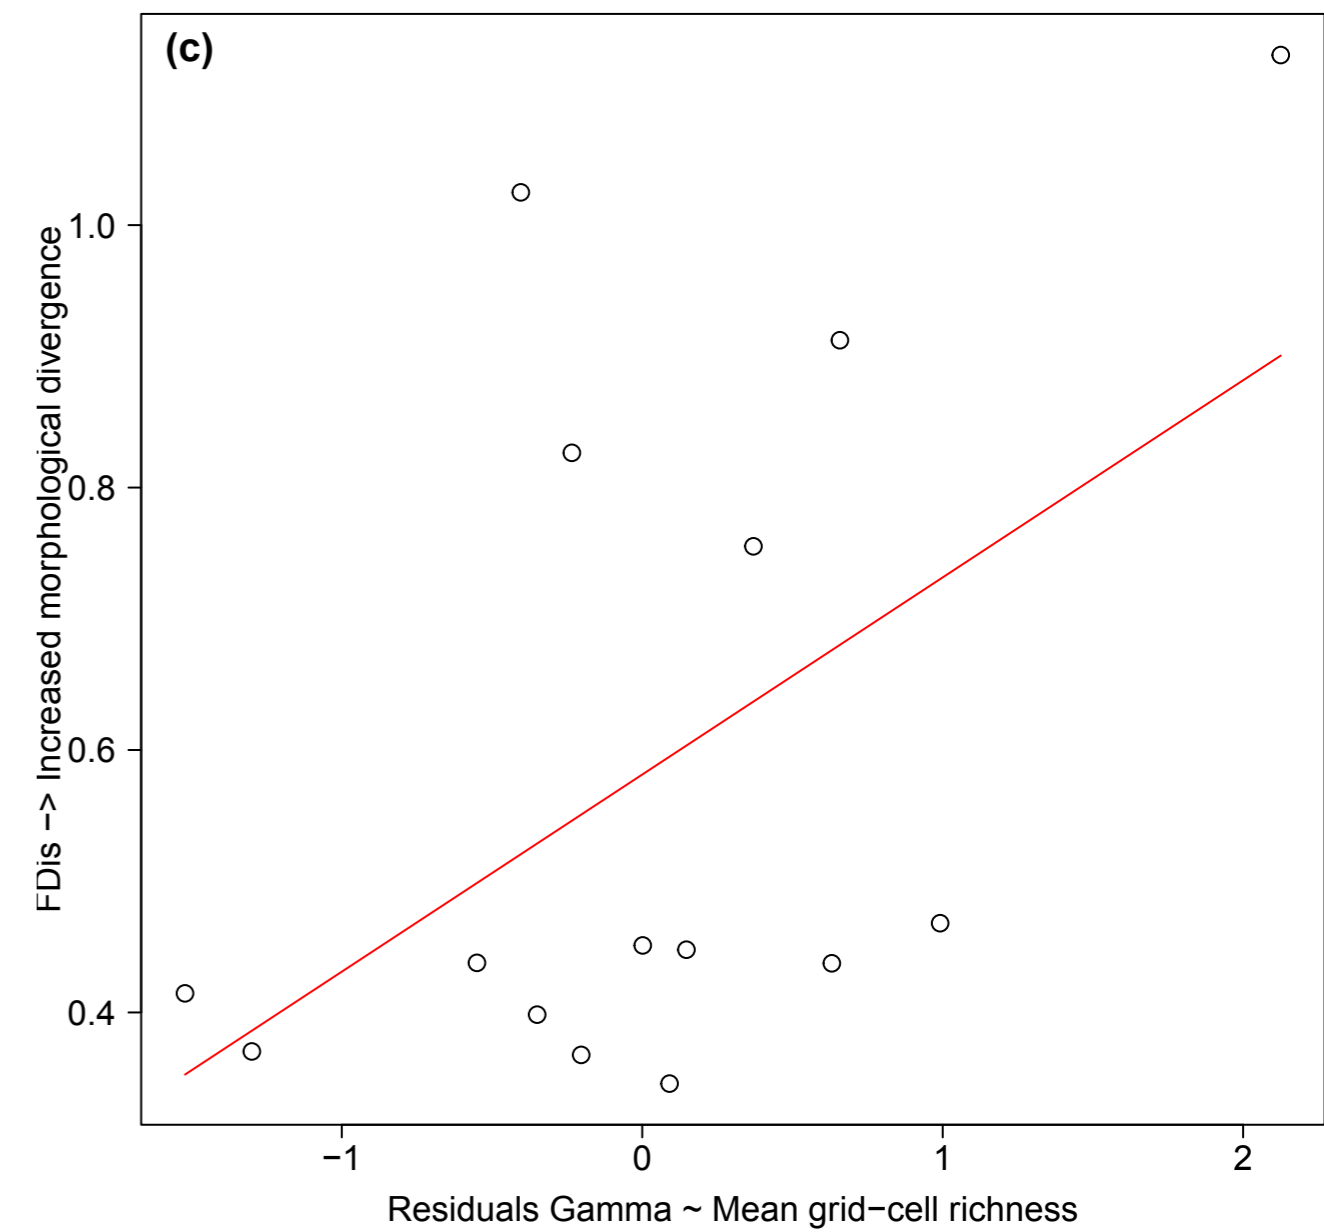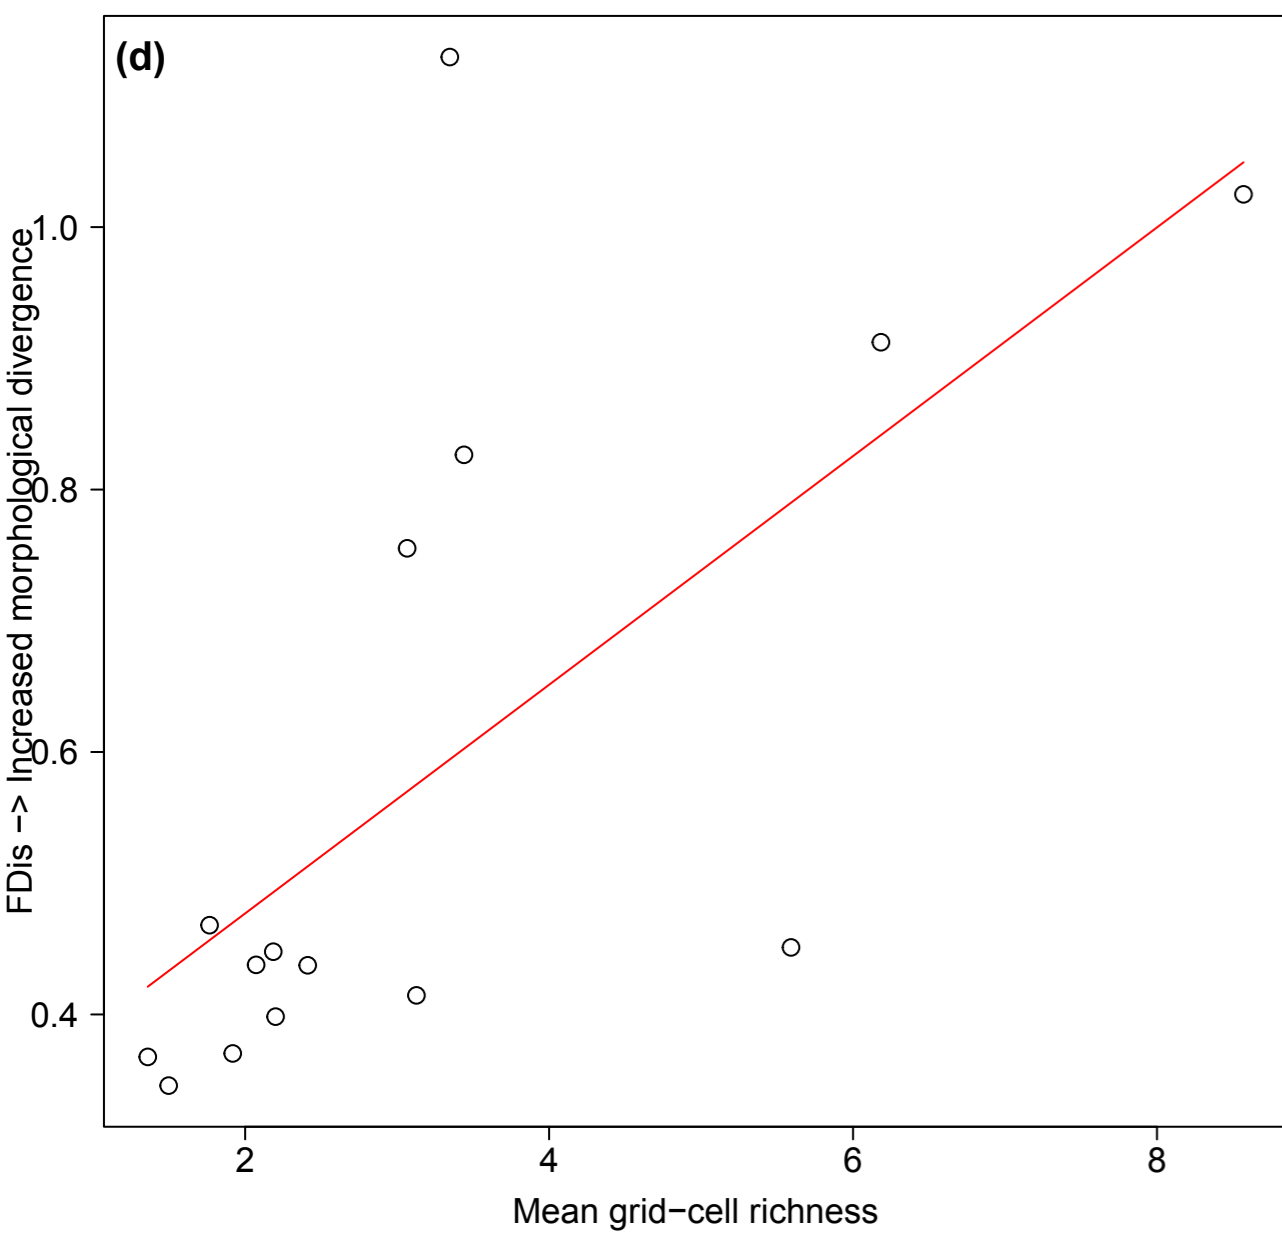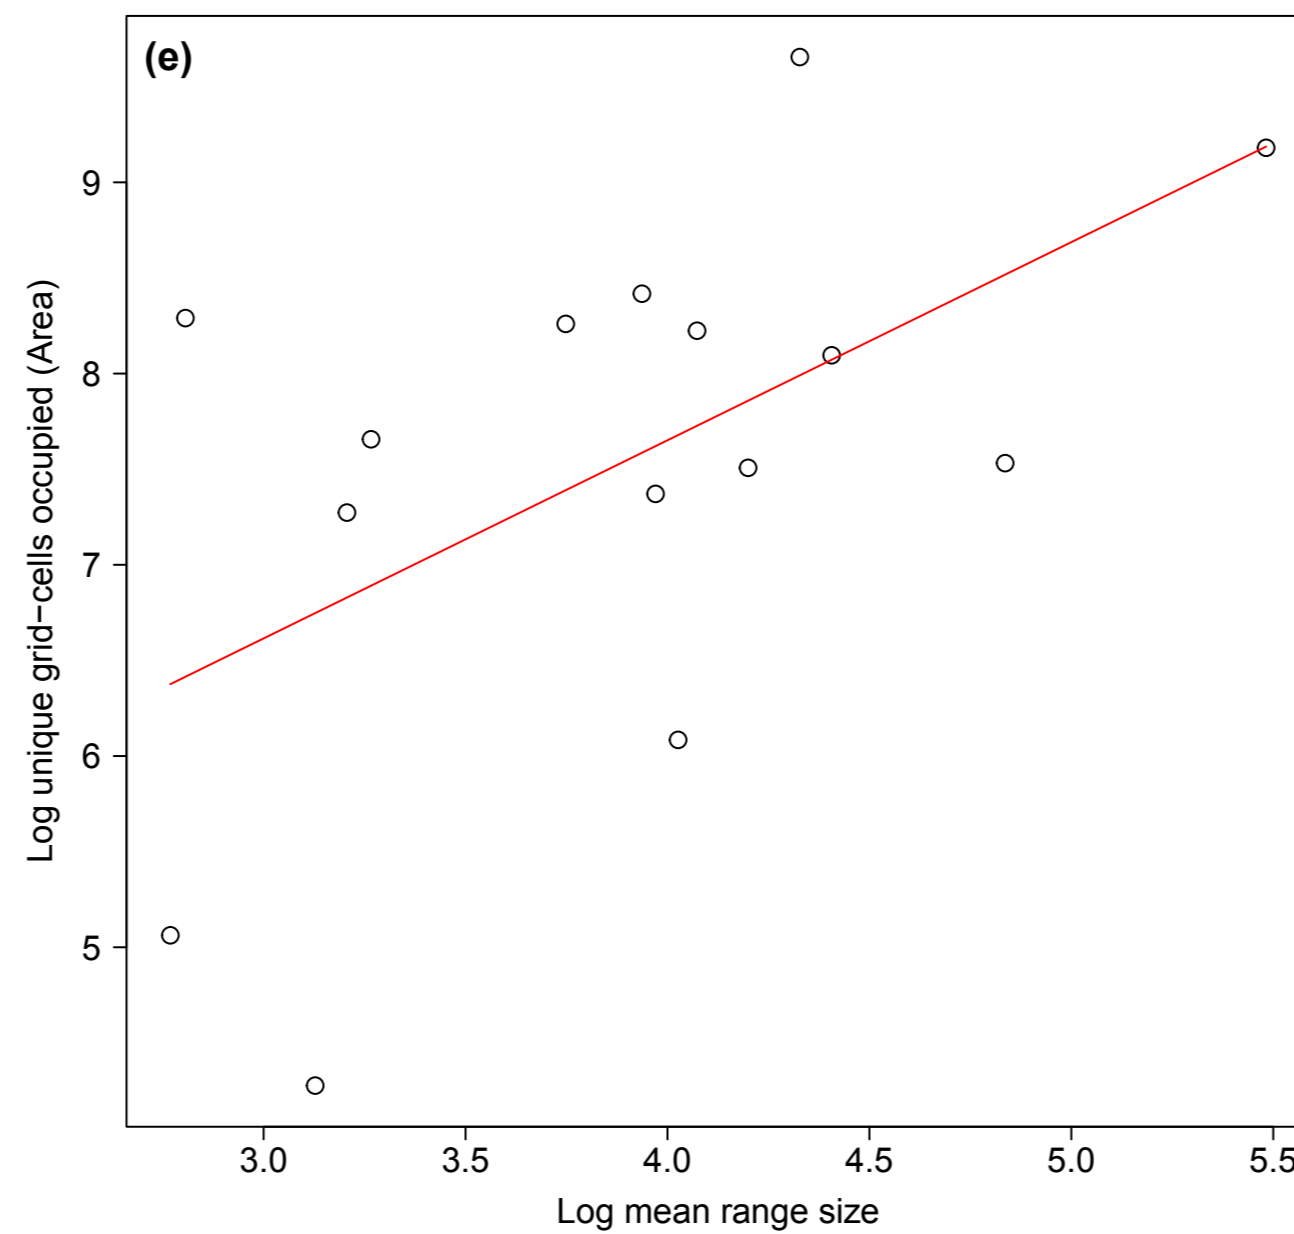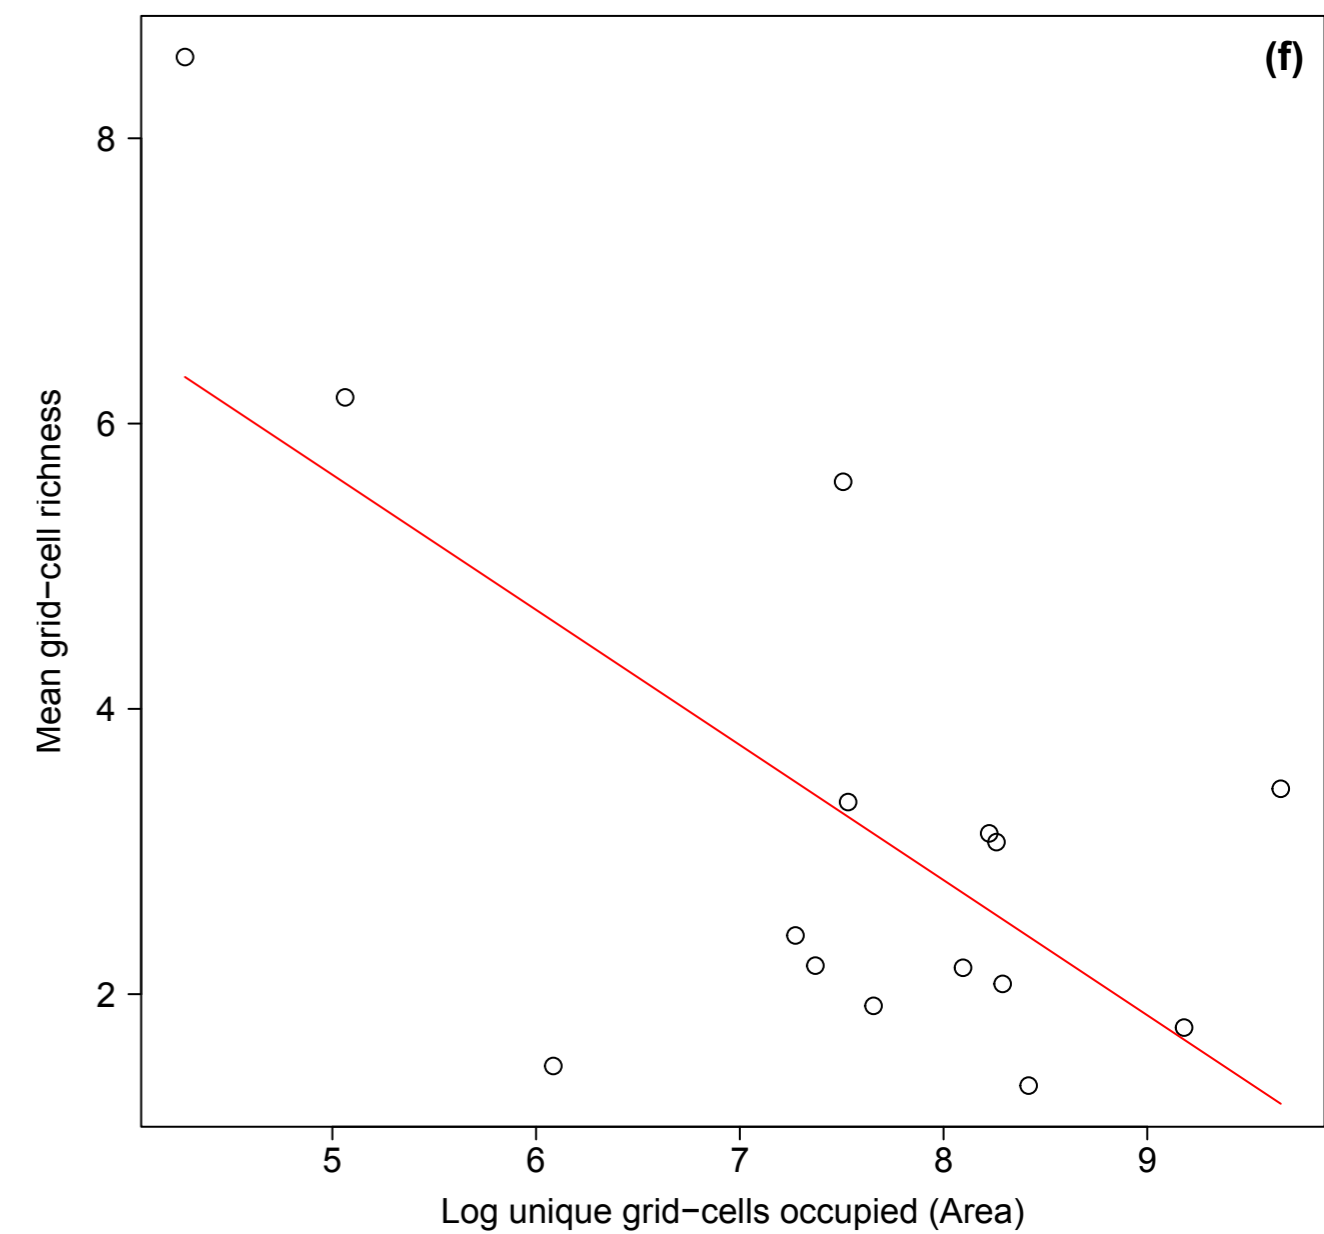

Supplement: rspb20182181supp7.pdf [file rspb20182181supp7.pdf]

# a) Artamidae - 23 species

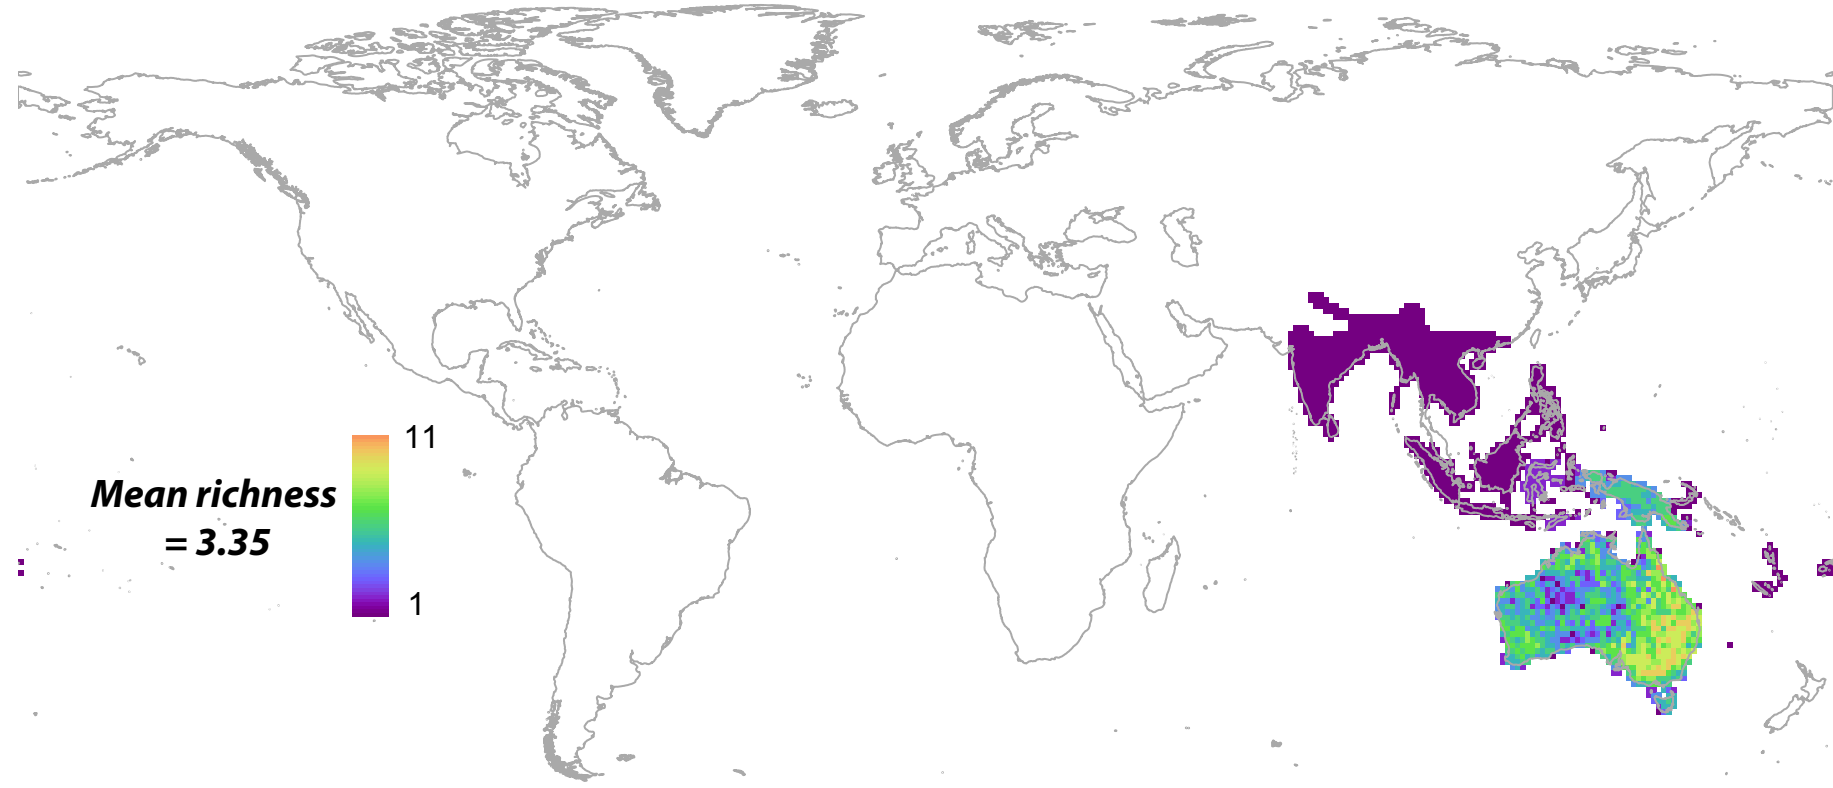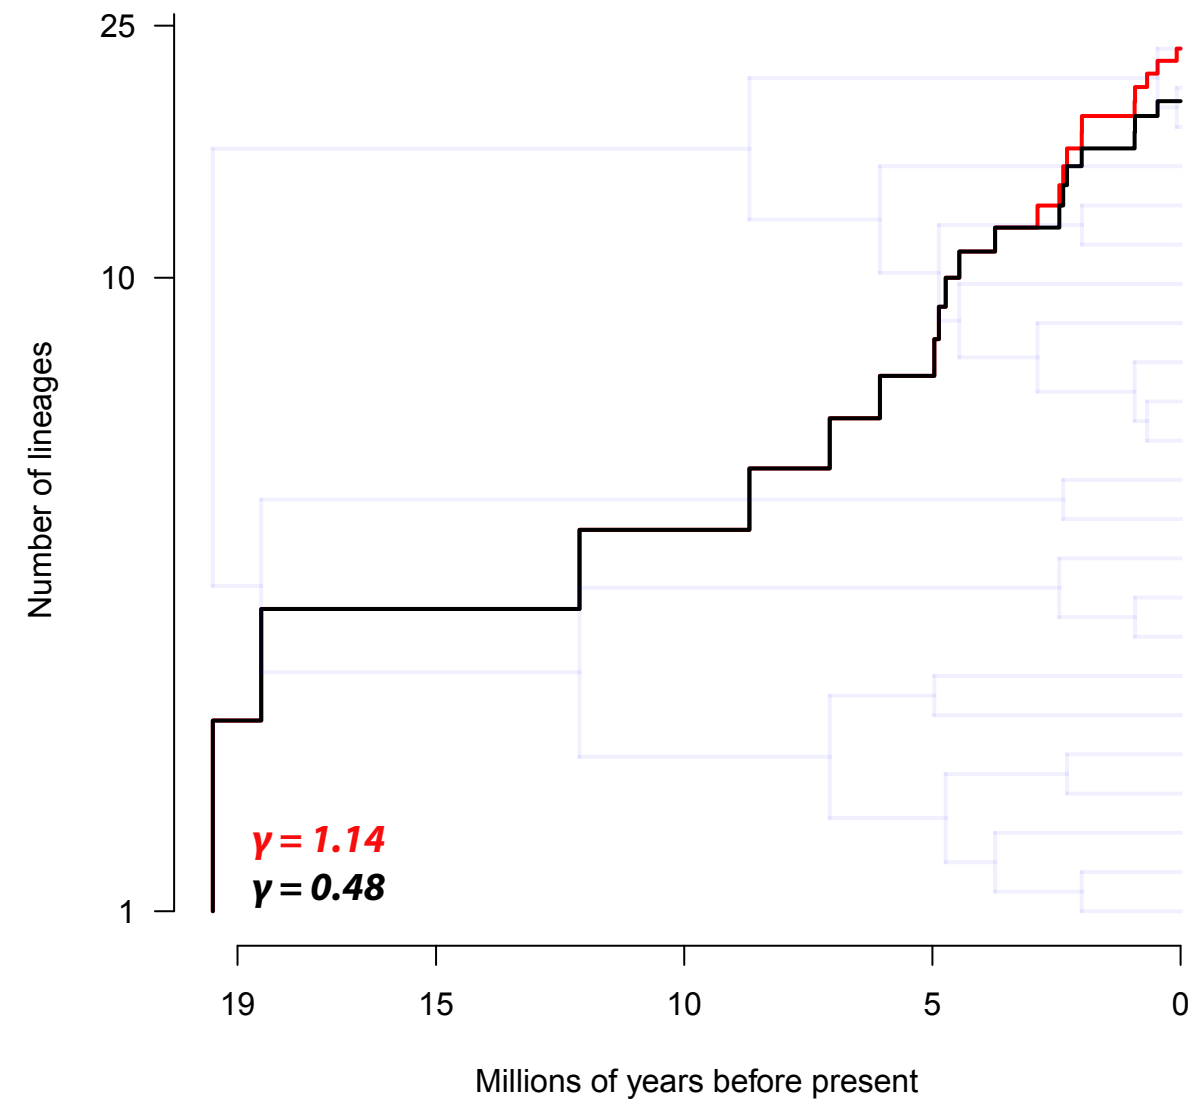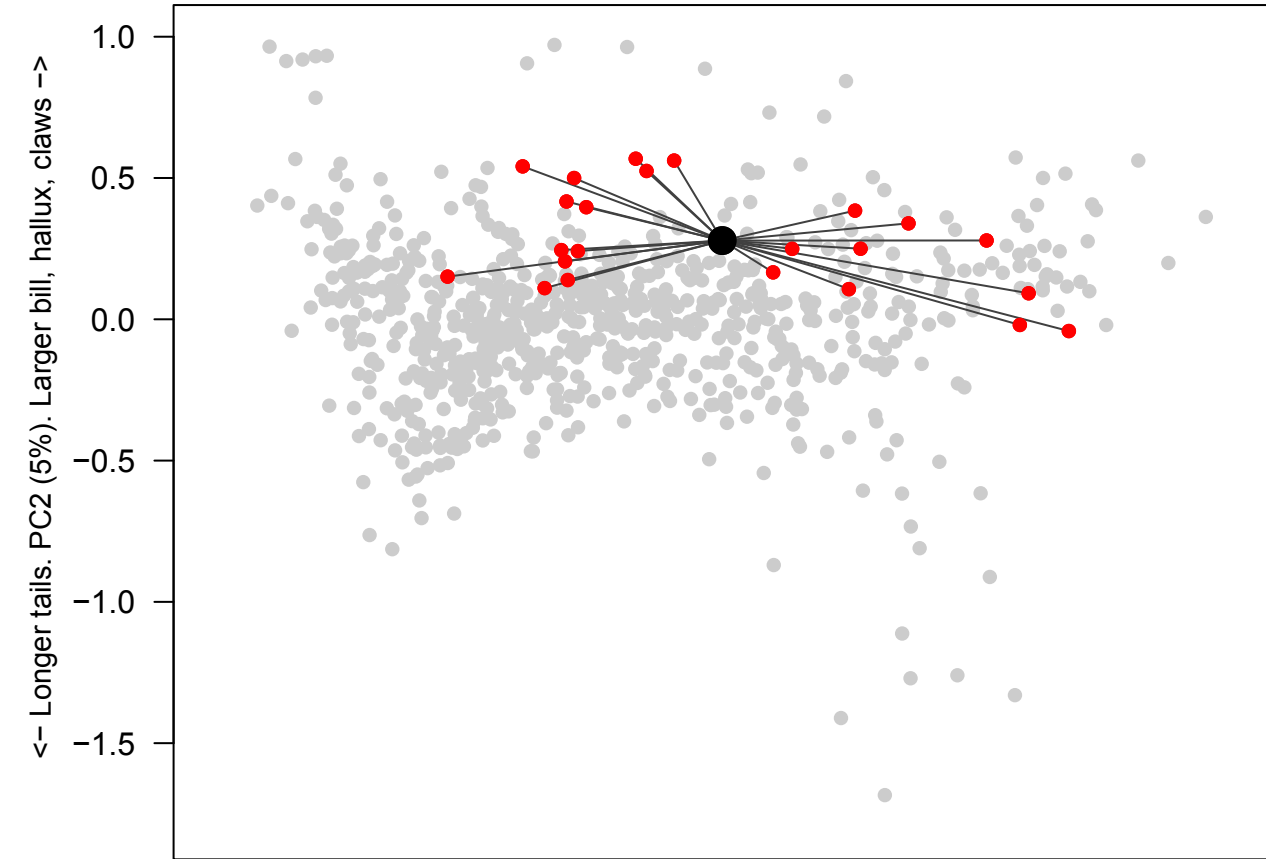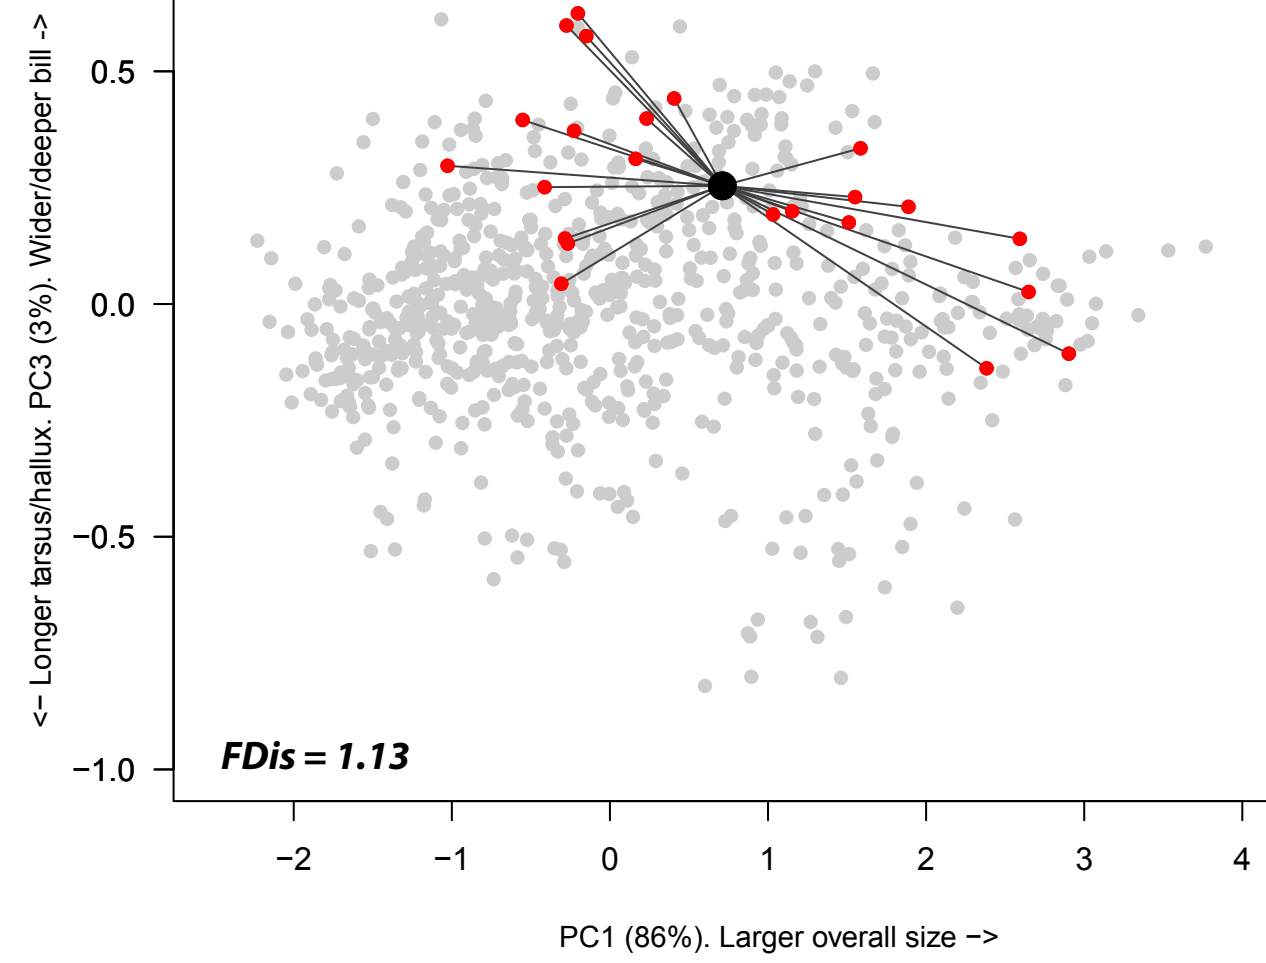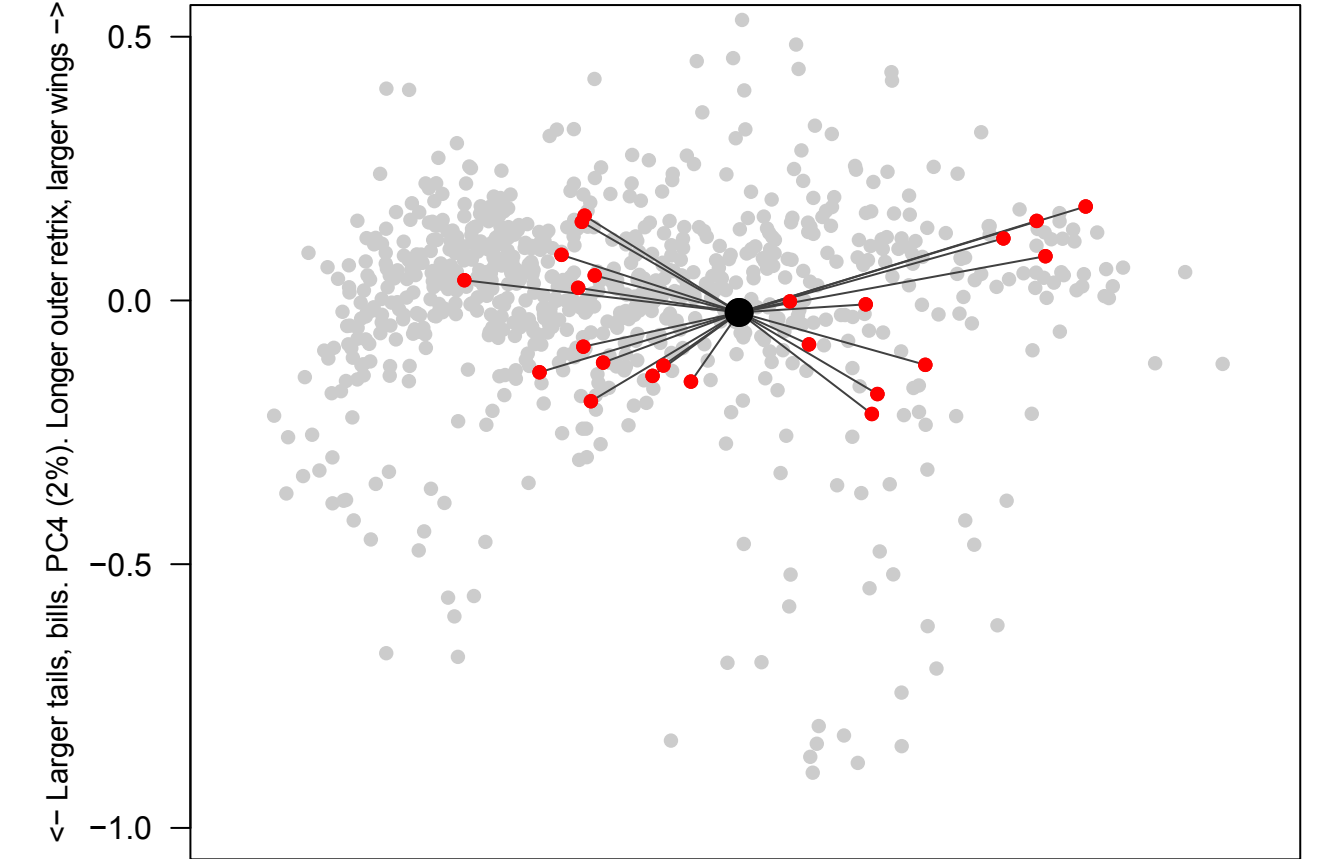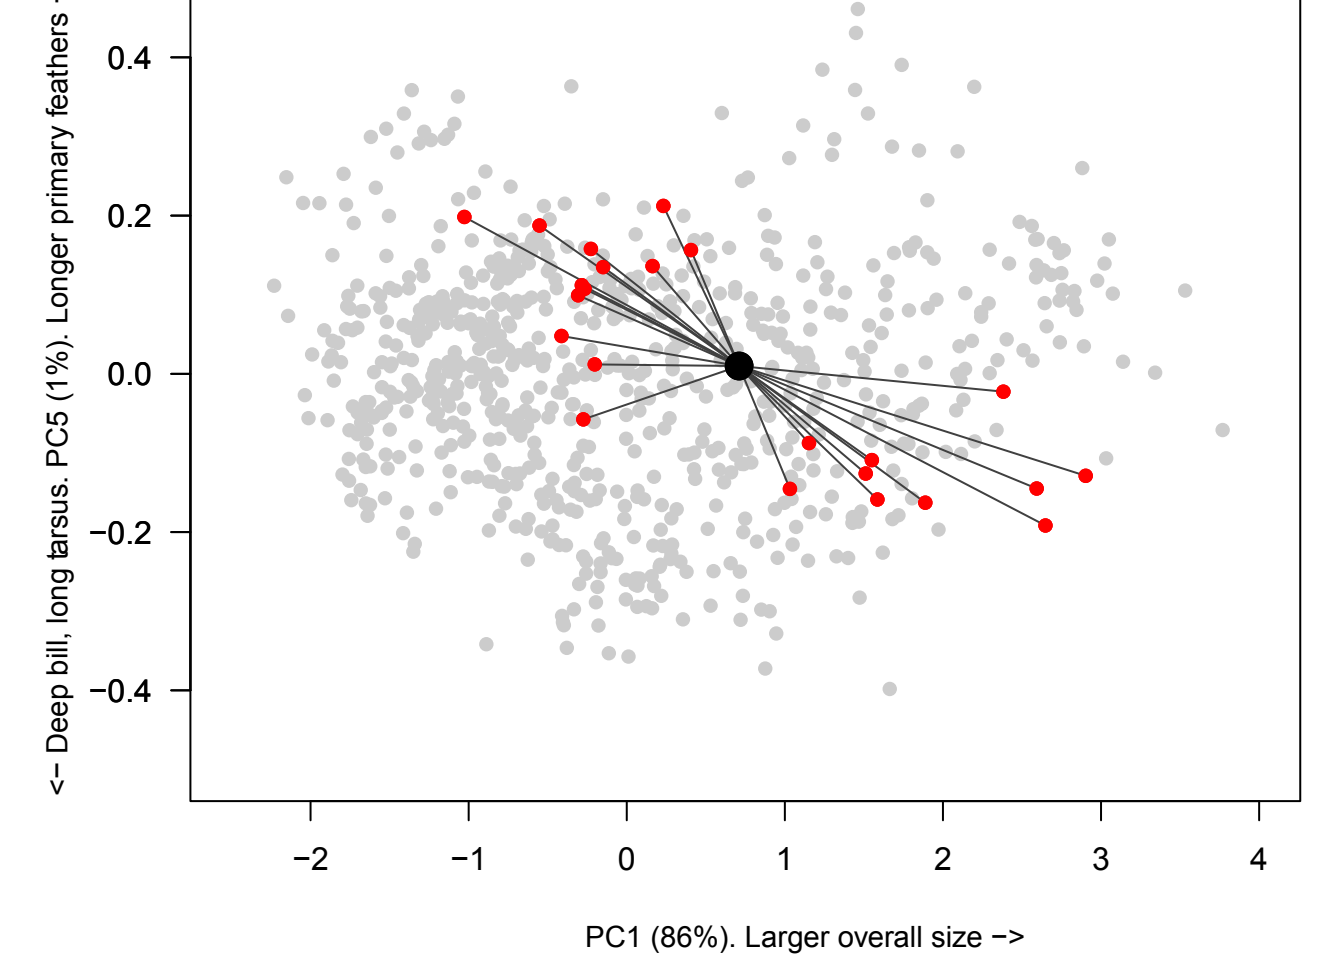

Supplement: rspb20182181supp8.pdf [file rspb20182181supp8.pdf]

# b) Campephagidae - 92 species

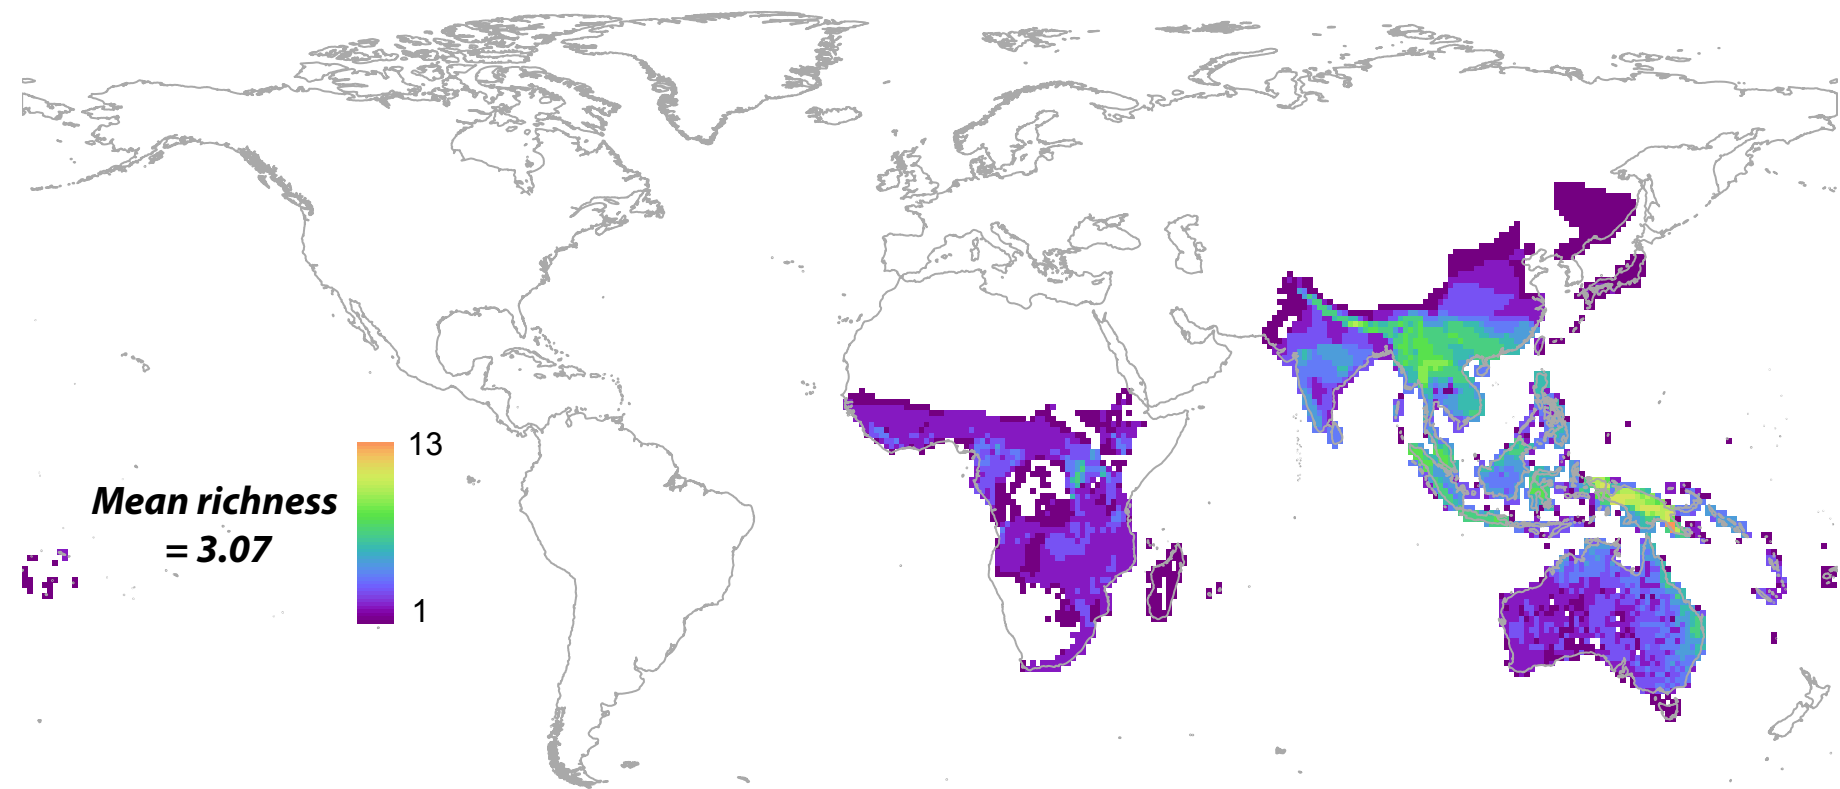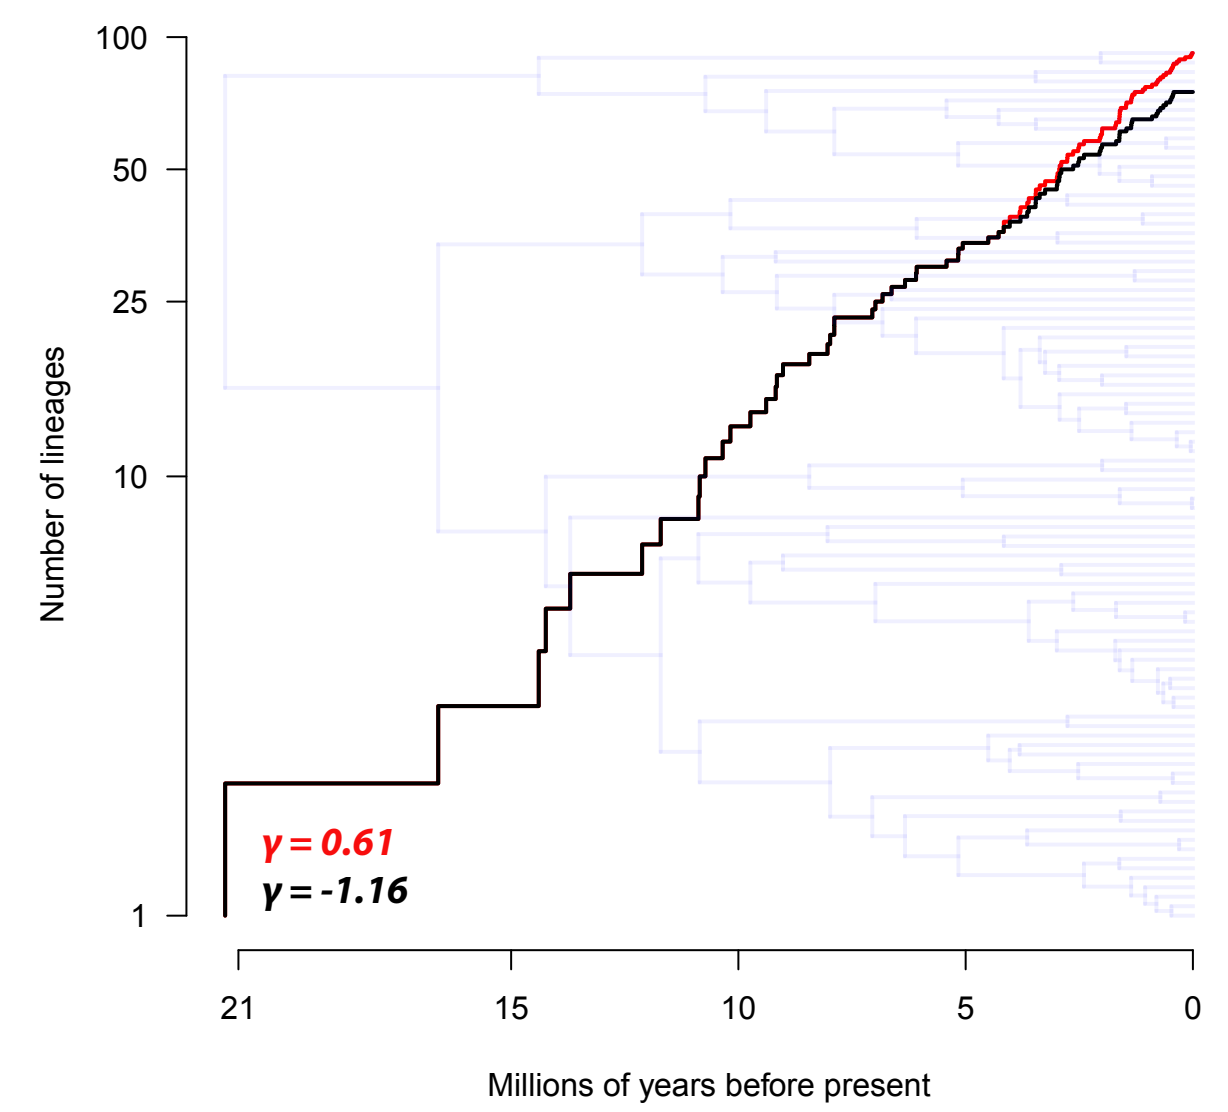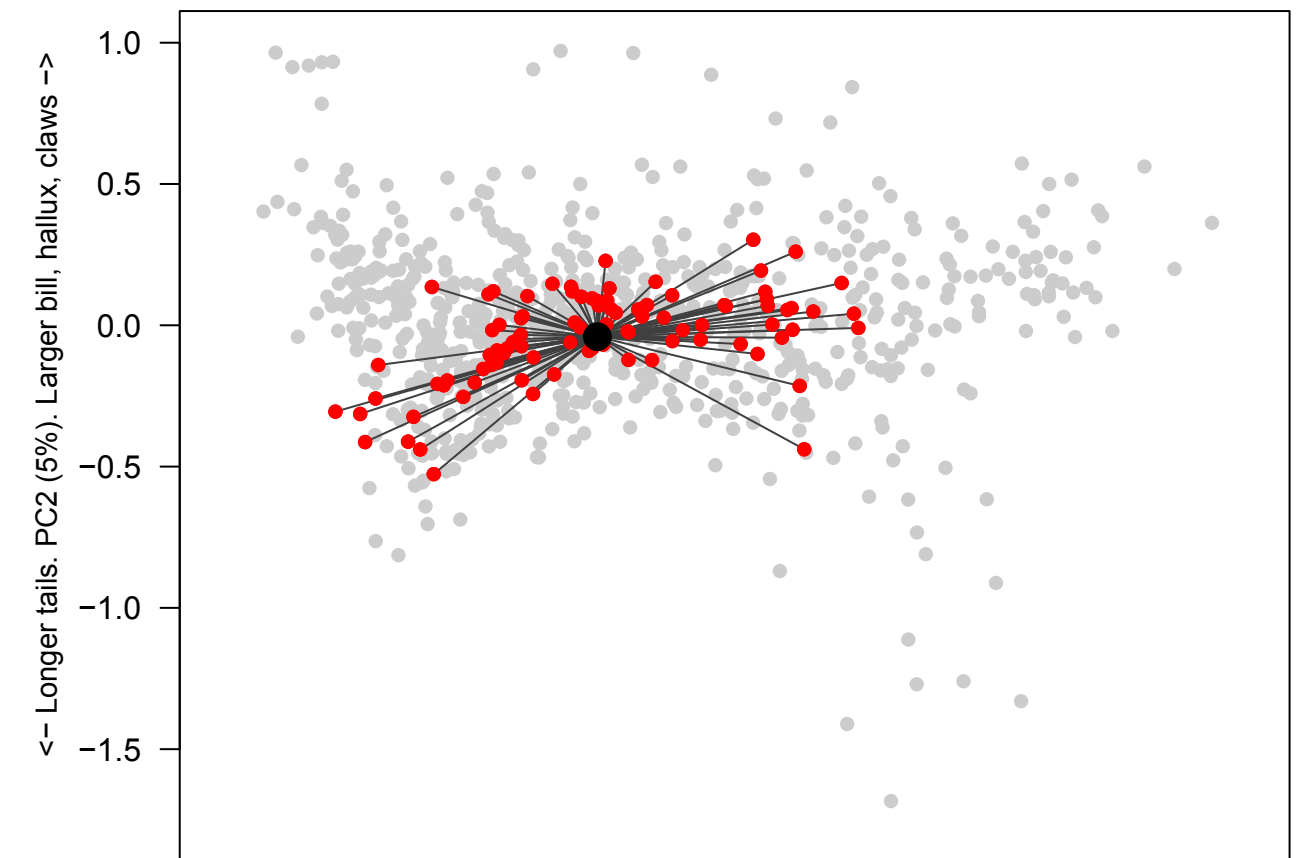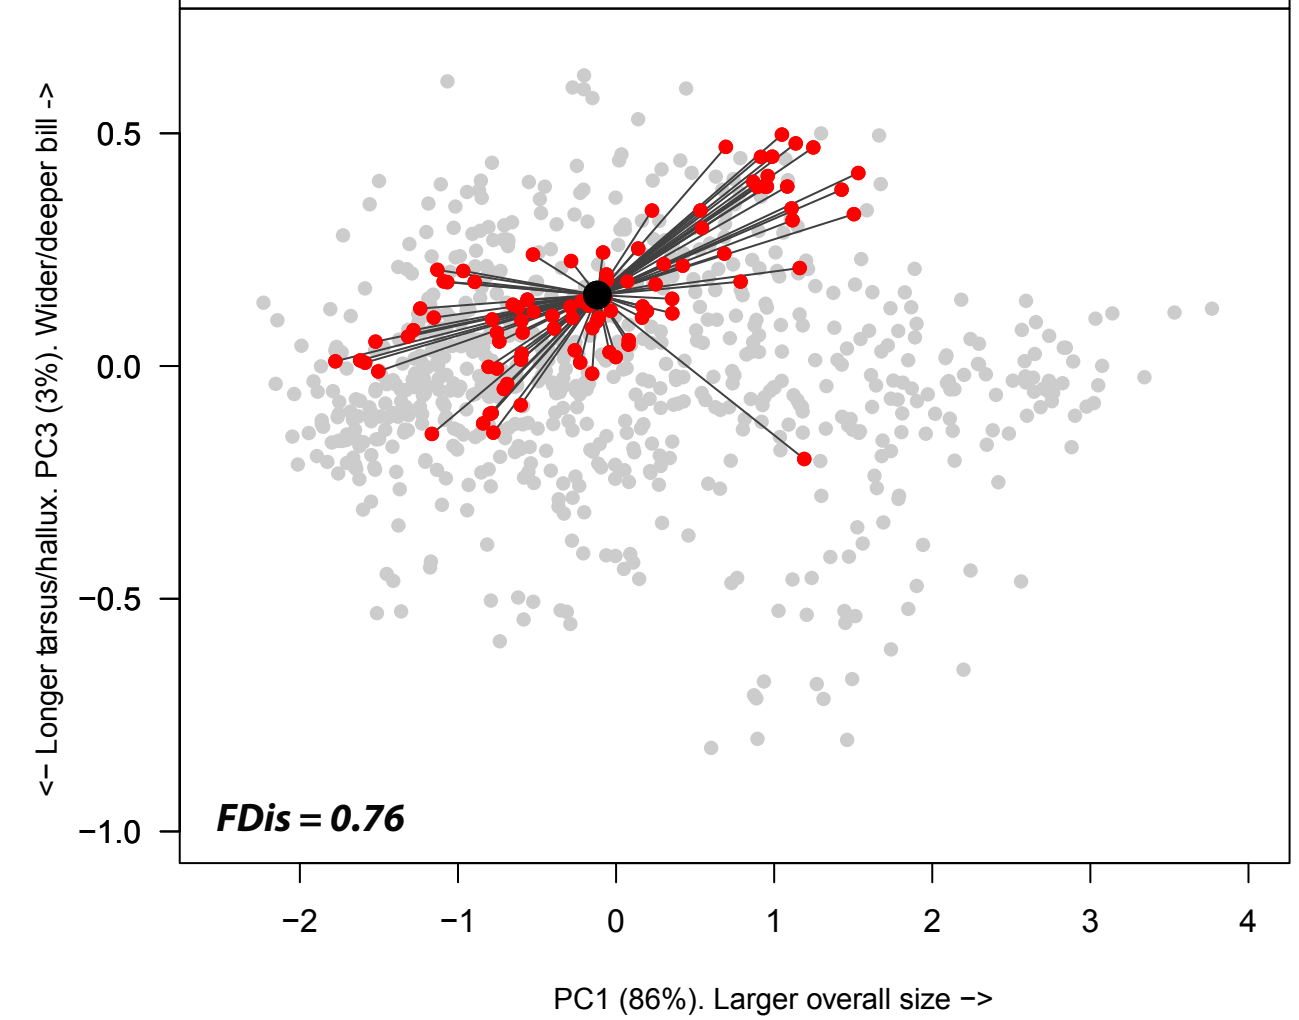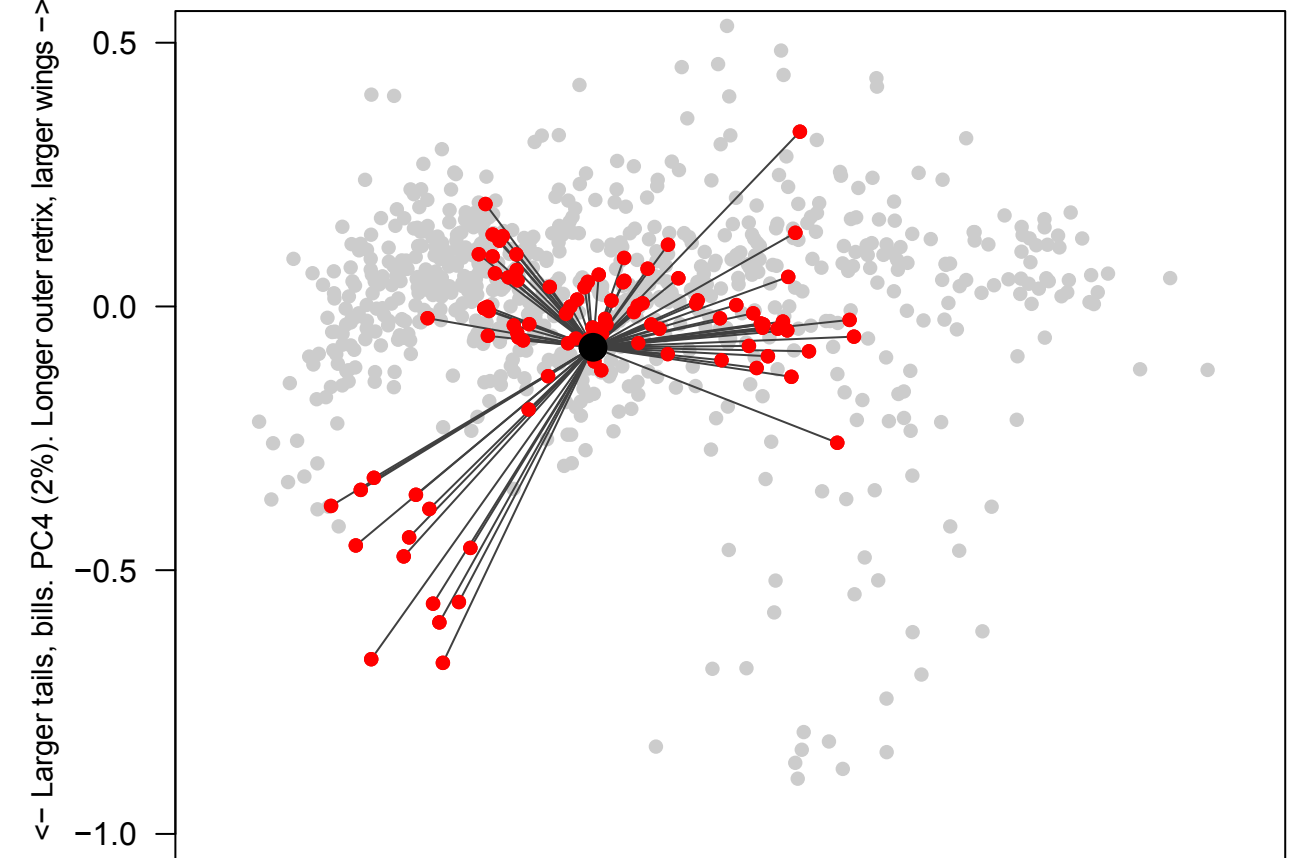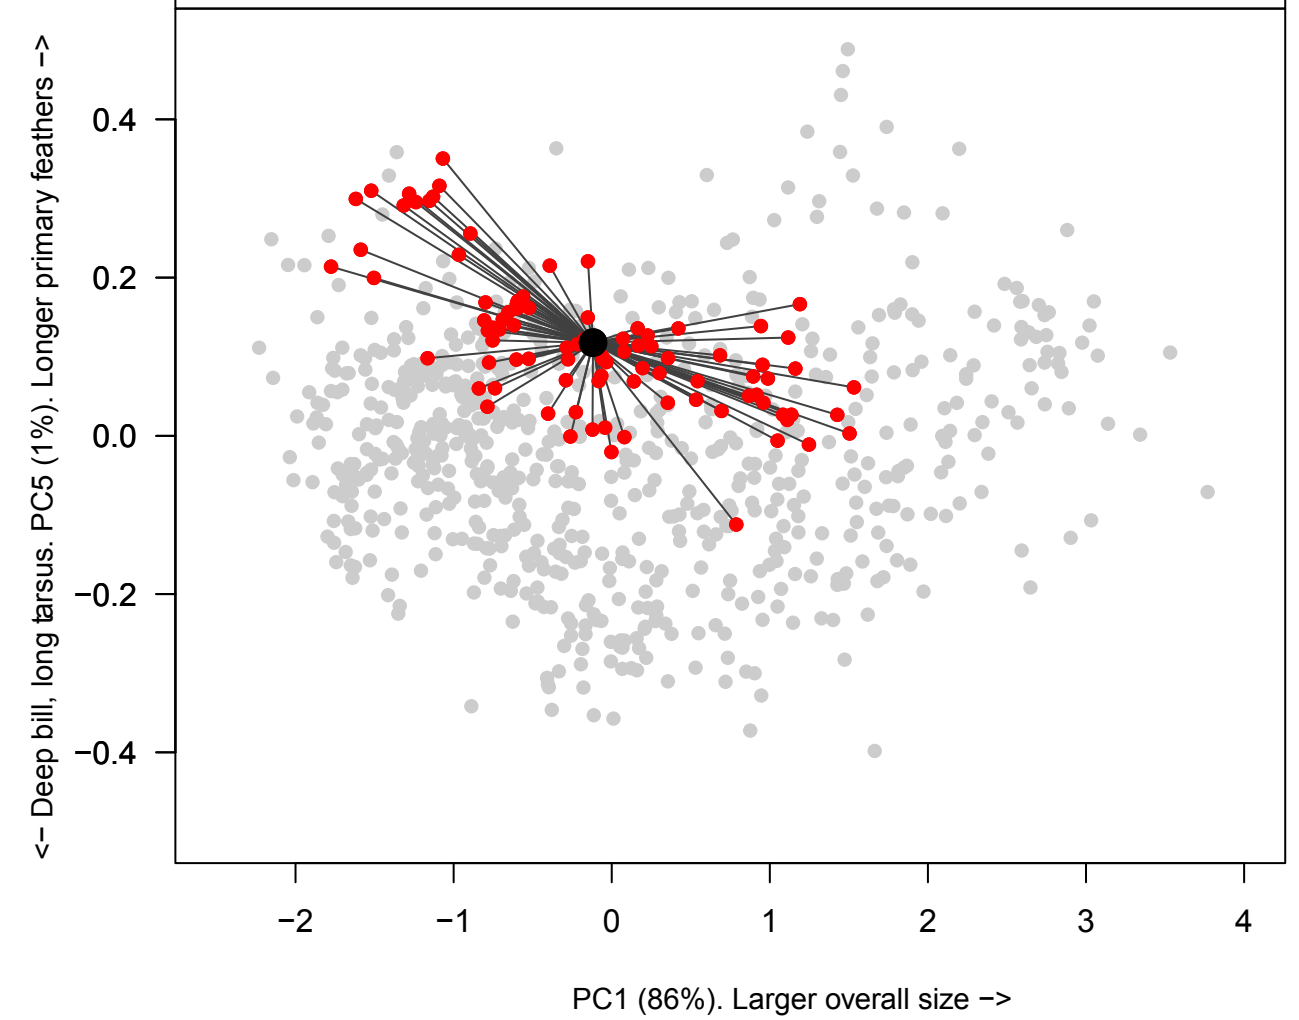

Supplement: rspb20182181supp9.pdf [file rspb20182181supp9.pdf]
